# Supplementary material for: Substituted spirooxindole derivatives as potent anticancer agents through inhibition of phosphodiesterase 1
Source: PubMed Central journal article supplement (PMC9079959; doi:10.1039/c8ra02358a), 2018-04-17
Supplement: RA-008-C8RA02358A-s001.pdf [file RA-008-C8RA02358A-s001.pdf]

*SUPPORTING INFORMATION*

**Table of contents**

1. General method for the synthesis of chalcone **1a-n**
2. Copies of NMR spectrum of **4a-n**

### 1. General method for the synthesis of chalcone **1a-n**

The 3-acetyl-indole (1.59 g, 10 mmol) was dissolved in ethanol 100 mL, in a 250 mL round bottom flask equipped with condenser and inert atmosphere. Aldehyde (2 eq) and KOH (2 eq) in 10 mL water were added to the reaction mixture. The resulting reaction mixture were heated to reflux for 24 hours. Then the solvent was removed under reduced pressure and the crude product were subjected to column chromatography using DCM as an eluent. Finally the products **1a-n** were further purified by ether washing.

#### (*E*)-1-(1-*H*-Indol-3-yl)-3-phenylprop-2-en-1-one (**1a**)

Yellow powder; m.p. 219-221 °C; <sup>1</sup>H-NMR (400 MHz, DMSO-*d*<sub>6</sub>) δ: 7.20-7.24 (m, 2H, Ar-H), 7.40-7.50 (m, 4H, Ar-H), 7.62 (d, 1H, *J* = 15.4 Hz, COCH=CH), 7.82-7.85 (t, 3H, *J* = 8.04 Hz, Ar-H & COCH=CH), 8.33 (d, 1H, *J* = 7.32 Hz, Ar-H), 8.74 (s, 1H, Ar-H), 12.10 (s, 1H, NH); <sup>13</sup>C-NMR (100 MHz, DMSO-*d*<sub>6</sub>) δ: 112.2, 117.7, 121.7, 121.8, 123.1, 124.6, 125.8, 128.4, 128.8, 129.7, 134.7, 135.2, 136.8, 139.5, 183.55; IR (KBr, cm<sup>-1</sup>) ν<sub>max</sub>= 3414(NH), 3135(C-H), 2924, 2864, 2590, 1639(C=O), 1513(C=C), 1442, 1150, 974, 745; [Anal. Calcd. for C<sub>17</sub>H<sub>13</sub>NO: C, 82.57; H, 5.30; N, 5.66; Found: C, 82.62; H, 5.28; N, 5.56]; LC/MS (ESI, *m/z*): 247.10 [M<sup>+</sup>] for 247.10 C<sub>17</sub>H<sub>13</sub>NO.

#### (*E*)-1-(1-*H*-Indol-3-yl)-3-(*p*-tolyl)prop-2-en-1-one (**1b**)

Yellow powder; m.p. 207-209 °C; <sup>1</sup>H-NMR (400 MHz, DMSO-*d*<sub>6</sub>) δ: 2.34 (s, 3H, CH<sub>3</sub>), 7.19 – 7.26 (m, 4H, Ar-H), 7.47 (d, 1H, *J* = 13.92 Hz, COCH=CH), 7.58 (d, 1H, *J* = 15.4 Hz, Ar-H), 7.65 – 7.79 (t, 3H, *J* = 8.08 Hz, Ar-H & COCH=CH), 8.31 (d, 1H, *J* = 6.60 Hz, Ar-H), 8.70 (s, 1H, Ar-H), 12.09 (s, 1H, NH); <sup>13</sup>C-NMR (100 MHz, DMSO-*d*<sub>6</sub>) δ: 112.2, 117.7, 121.7, 121.9, 123.2, 123.6, 125.9, 128.4, 129.5, 132.5, 134.5, 134.7, 136.8, 139.6, 183.7; IR (KBr, cm<sup>-1</sup>) ν<sub>max</sub>= 3157(NH), 2862(C-H), 2361, 1641(C=O), 1568(C=C), 1517, 1441, 1147, 973; [Anal. Calcd. for C<sub>18</sub>H<sub>15</sub>NO: C, 82.12; H, 5.79; N, 5.36; Found: C, 82.10; H, 5.91; N, 5.35]; LC/MS (ESI, *m/z*): 216.10 [M<sup>+</sup>] for 216.12 C<sub>18</sub>H<sub>15</sub>NO.

#### (*E*)-3-(4-Chlorophenyl)-1-(1-*H*-indol-3-yl)prop-2-en-1-one (**1c**)

Yellow powder; m.p: 237-239°C; <sup>1</sup>H-NMR (400 MHz, DMSO-*d*<sub>6</sub>) δ: 7.20 – 7.25 (m, 3H, Ar-H), 7.45 – 7.53 (m, 4H, Ar-H), 7.61 (d, 1H, *J* = 15.4 Hz, COCH=CH), 7.84-7.90 (m, 2H, Ar-H & COCH=CH), 8.33 (d, 1H, *J* = 8.08 Hz, Ar-H), 8.74 (s, 1H, Ar-H), 12.13 (s, 1H, NH); <sup>13</sup>C-NMR (100 MHz, DMSO-*d*<sub>6</sub>) δ: 112.2, 117.7, 121.7, 121.9, 123.2, 124.3, 125.4, 125.8, 128.8, 130.1, 134.2, 135.0, 136.9, 138.1, 183.4; IR (KBr, cm<sup>-1</sup>) ν<sub>max</sub>=

3144(NH), 2925(C-H), 2862, 2365, 1638(C=O), 1570(C=C), 1516, 1440, 1150, 976, 749; [Anal. Calcd. for C<sub>17</sub>H<sub>12</sub>ClNO: C, 72.47; H, 4.29; N, 4.97; Found: C, 72.38; H, 4.30; N, 4.87]; LC/MS (ESI, *m/z*): 281.10 [M<sup>+</sup>] for 281.06 C<sub>17</sub>H<sub>12</sub>ClNO.

*(E)*-3-(2,4-Dichlorophenyl)-1-(1-*H*-indol-3-yl)prop-2-en-1-one (**1d**)

Yellow powder; m.p: 244-247 °C; <sup>1</sup>H-NMR (400 MHz, DMSO-*d*<sub>6</sub>) δ: 7.19-7.30 (m, 2H, Ar-H), 7.51 (t, 2H, *J* = 8.84 Hz, Ar-H), 7.7 (s, 1H, Ar-H), 7.72 – 7.89 (m, 2H, Ar-H & COCH=CH), 8.21 (d, 1H, *J* = 8.08 Hz, COCH=CH), 8.31 (d, 1H, *J* = 7.36 Hz, Ar-H), 8.75 (s, 1H, Ar-H), 12.10 (s, 1H, NH); <sup>13</sup>C-NMR (100 MHz, DMSO-*d*<sub>6</sub>) δ: 112.42, 117.6, 121.6, 122.0, 123.3, 126.0, 127.8, 128.2, 129.4, 132.0, 133.0, 134.7, 134.8, 135.6, 135.7, 137.2, 182.8; IR (KBr, cm<sup>-1</sup>) ν<sub>max</sub>= 3435(NH), 2932(C-H), 2869, 2594, 1636(C=O), 1574(C=C), 1440, 1153, 1047, 968; [Anal. Calcd. for C<sub>17</sub>H<sub>11</sub>Cl<sub>2</sub>NO: C, 64.58; H, 3.51; N, 4.43; Found: C, 64.59; H, 3.53; N, 4.42]; LC/MS (ESI, *m/z*): 315.10 [M<sup>+</sup>] for 315.02 C<sub>17</sub>H<sub>11</sub>Cl<sub>2</sub>NO.

*(E)*-1-(1-*H*-Indol-3-yl)-3-(4-methoxyphenyl)prop-2-en-1-one (**1e**)

Yellow powder; m.p: 168-172 °C; <sup>1</sup>H-NMR (400 MHz, DMSO-*d*<sub>6</sub>) δ: 3.37 (s, 3H, OCH<sub>3</sub>), 7.01 (d, 2H, *J* = 8.8 Hz, Ar-H), 7.02 – 7.24 (m, 2H, Ar-H), 7.49 (d, 1H, *J* = 7.32 Hz, COCH=CH), 7.59 (d, 1H, *J* = 16.2 Hz, Ar-H), 7.70 (d, 1H, *J* = 15.4 Hz, COCH=CH), 7.80(d, 2H, *J* = 8.8 Hz, Ar-H), 8.33 (d, 1H, *J* = 6.6 Hz, Ar-H), 8.69 (s, 1H, Ar-H), 12.06 (s, 1H, NH); <sup>13</sup>C-NMR (100 MHz, DMSO-*d*<sub>6</sub>) δ: 55.3, 112.1, 114.3, 117.8, 121.8, 122.3, 123.0, 126, 127.8, 130.1, 134.4, 136.8, 139.4, 160.7, 183.7; IR (KBr, cm<sup>-1</sup>) ν<sub>max</sub>= 3100(NH), 2866(C-H), 2372, 1715(C=O), 1514(C=C), 1438, 1249, 1159, 976, 746; [Anal. Calcd. for C<sub>18</sub>H<sub>15</sub>NO<sub>2</sub>: C, 77.96; H, 5.45; N, 5.05; Found: C, 77.90; H, 5.41; N, 5.11]; LC/MS (ESI, *m/z*): 277.10 [M<sup>+</sup>] for 277.11 C<sub>18</sub>H<sub>15</sub>NO<sub>2</sub>.

*(E)*-3-(4-Bromophenyl)-1-(1-*H*-indol-3-yl)prop-2-en-1-one (**1f**)

Yellow powder; m.p: 235-238 °C; <sup>1</sup>H-NMR (400 MHz, DMSO-*d*<sub>6</sub>) δ: 7.22 – 7.25 (m, 2H, Ar-H), 7.50 (d, 1H, *J* = 8.04 Hz, Ar-H), 7.59 (d, 1H, *J* = 15.4 Hz, COCH=CH), 7.65 (d, 2H, *J* = 8.8 Hz, Ar-H), 7.81-7.89 (m, 3H, Ar-H & COCH=CH), 8.33 (d, 1H, *J* = 7.36 Hz, Ar-H), 8.75 (s, 1H, Ar-H), 12.13 (s, 1H, NH); <sup>13</sup>C-NMR (100 MHz, DMSO-*d*<sub>6</sub>) δ: 112.2, 117.7, 121.6, 121.8, 123.0, 125.5, 125.8, 130.2, 131.8, 134.5, 134.6, 135.1, 136.9, 138.2, 183.3; IR (KBr, cm<sup>-1</sup>) ν<sub>max</sub>= 3215(NH), 2929(C-H), 1643(C=O), 1576(C=C), 1517, 1443,

1144, 970, 734; [Anal.Calcd. for C<sub>17</sub>H<sub>12</sub>BrNO: C,62.60;H,3.71; N, 4.21; Found: C,62.65;H,3.81; N, 4.19]; LC/MS (ESI, *m/z*): 325.10[M<sup>+</sup>] for 325.01 C<sub>17</sub>H<sub>12</sub>BrNO.

*(E)*-3-(4-Fluorophenyl)-1-(1-*H*-indol-3-yl)prop-2-en-1-one (**1g**)

Yield (84%); Yellow powder; m.p: 204-206°C; <sup>1</sup>H-NMR (400 MHz, DMSO-*d*<sub>6</sub>) $\delta$ : 7.22 – 7.29 (m, 3H, Ar-H), 7.51(d, 1H, *J* = 8.8 Hz, Ar-H), 7.64 (t, 1H, *J* = 15 Hz, COCH=CH), 7.78 – 7.83 (m, 2H, Ar-H & COCH=CH), 7.91 – 7.94 (m 2H, Ar-H), 8.35 (d, 1H, *J* = 7.32 Hz, Ar-H), 8.74 (s, 1H, Ar-H), 12.13 (s, 1H, NH); <sup>13</sup>C-NMR (100 MHz, DMSO-*d*<sub>6</sub>)  $\delta$ : 112.2, 114.7, 115.7, 116.0, 117.7, 121.8, 121.9, 123.2, 124.6, 125.9, 130.6, 130.7, 131.9, 134.8, 136.9, 138.3, 161.5, 164.4, 183.6; IR (KBr, cm<sup>-1</sup>)  $\nu_{\max}$ = 3409(NH), 2867(C-H), 2979, 1641(C=O), 1514(C=C), 1439, 1237, 1009, 774, 507; [Anal. Calcd. for C<sub>17</sub>H<sub>12</sub>FNO: C, 76.97; H, 4.56; N, 5.28; Found: C, 76.98; H, 4.44; N, 5.32]; LC/MS (ESI, *m/z*): 265.09[M<sup>+</sup>] for 265.10 C<sub>17</sub>H<sub>12</sub>FNO.

*(E)*-3-(3-Fluorophenyl)-1-(1-*H*-indol-3-yl)prop-2-en-1-one (**1h**)

Yellow powder; m.p: 224-226°C; <sup>1</sup>H-NMR (400 MHz, DMSO-*d*<sub>6</sub>)  $\delta$ : 7.20 – 7.38 (m, 3H, Ar-H), 7.42 – 7.56 (m, 1H, COCH=CH), 7.60 – 7.72 (m, 3H, Ar-H & COCHCH), 7.81 (d, 1H, *J* = 3.2 Hz, Ar-H), 7.91 (d, 1H, *J* = 2.4 Hz, Ar-H), 8.35 (s, 1H, Ar-H), 8.75 (s, 1H, Ar-H), 12.15 (s, 1H, NH); <sup>13</sup>C-NMR (100 MHz, DMSO-*d*<sub>6</sub>)  $\delta$ : 112.2, 114.0, 114.2, 115.7, 115.9, 116.3, 116.5, 117.8, 121.8, 121.9, 123.2, 125.2, 125.8, 126.0, 130.7, 135.1, 136.9, 138.1, 161.4, 163.8, 183.3; IR (KBr, cm<sup>-1</sup>)  $\nu_{\max}$ = 3433(NH), 3047(C-H), 2866, 1933, 1642(C=O), 1562(C=C), 1440, 1153, 1008, 879; [Anal. Calcd. for C<sub>17</sub>H<sub>12</sub>FNO: C, 76.97; H, 4.56; N, 5.28; Found: C, 76.80; H, 4.09; N, 5.25]; LC/MS (ESI, *m/z*): 265.10[M<sup>+</sup>] for 265.01 C<sub>17</sub>H<sub>12</sub>FNO.

*(E)*-1-(1-*H*-Indol-3-yl)-3-(*m*-tolyl)prop-2-en-1-one (**1i**)

Yellow powder; m.p: 197-199 °C; <sup>1</sup>H-NMR (400 MHz, DMSO-*d*<sub>6</sub>)  $\delta$ : 2.35 (s, 3H, CH<sub>3</sub>), 7.18 – 7.25 (m, 2H, Ar-H), 7.31 (t, 1H, *J* = 8.04 Hz, Ar-H), 7.49 (d, 1H, *J* = 6.60 Hz, Ar-H), 7.57 (s, 1H, Ar-H), 7.61 (d, 2H, *J* = 5.8 Hz, Ar-H & COCH=CH), 7.67 (s, 1H, Ar-H), 7.81 (d, 1H, *J* = 15.4 Hz, COCH=CH), 8.33 (d, 1H, *J* = 8.8 Hz, Ar-H), 8.73 (d, 1H, *J* = 2.9 Hz, Ar-H), 12.10 (s, 1H, NH); <sup>13</sup>C-NMR (100 MHz, DMSO-*d*<sub>6</sub>)  $\delta$ : 20.9, 112.1, 117.7, 121.7, 121.8, 123.0, 124.4, 125.7, 125.8, 128.6, 128.7, 130.5, 134.7, 135.1, 136.8, 138.0, 139.6, 183.6; IR (KBr, cm<sup>-1</sup>)  $\nu_{\max}$ = 3411(NH), 2922(C-H), 1641(C=O), 1561(C=C),

1439, 1154, 1006, 746; [Anal. Calcd. for C<sub>18</sub>H<sub>15</sub>NO: C, 82.73; H, 5.79; N, 5.36; Found: C, 82.75; H, 5.91; N, 5.49]; LC/MS (ESI, *m/z*): 261.30[M<sup>+</sup>] for 261.32 C<sub>18</sub>H<sub>15</sub>NO.

*(E)*-3-(3-Bromophenyl)-1-(1-*H*-indol-3-yl)prop-2-en-1-one (**1j**)

Yellow powder; m.p: 228-230°C; <sup>1</sup>H-NMR (400 MHz, DMSO-*d*<sub>6</sub>) δ: 7.19 – 7.26 (m, 2H, Ar-H), 7.39 (t, 1H, *J* = 8.08 Hz, Ar-H), 7.50 (d, 1H, *J* = 8.08 Hz, Ar-H), 7.57 – 7.60 (m, 2H, Ar-H & COCH=CH), 7.80 (d, 1H, *J* = 8.08 Hz, Ar-H), 7.89 (d, 1H, *J* = 15.4 Hz, COCH=CH), 8.16 (s, 1H, Ar-H), 8.31 (d, 1H, *J* = 6.60 Hz, Ar-H), 8.78 (s, 1H, Ar-H), 12.14 (s, 1H, NH); <sup>13</sup>C-NMR (100 MHz, DMSO-*d*<sub>6</sub>) δ: 112.2, 117.7, 121.7, 121.9, 122.3, 123.1, 125.8, 126.1, 127.8, 130.2, 130.8, 132.2, 135.1, 136.8, 137.7, 137.8, 183.2; IR (KBr, cm<sup>-1</sup>) ν<sub>max</sub>= 3386(NH), 3248(C-H), 2958, 2867, 1716, 1618(C=O), 1520(C=C), 1470, 1422, 1243, 1137, 1153, 748, 698; [Anal. Calcd. for C<sub>17</sub>H<sub>12</sub>BrNO: C, 62.60; H, 3.71; N, 4.29; Found: C, 62.53; H, 3.70; N, 4.30]; LC/MS (ESI, *m/z*): 325.1[M<sup>+</sup>] for 325.01 C<sub>17</sub>H<sub>12</sub>BrNO.

*(E)*-1-(1-*H*-Indol-3-yl)-3-(4-(trifluoromethyl)phenyl)prop-2-en-1-one (**1k**)

Yellow powder; m.p: 240-242 °C; <sup>1</sup>H-NMR (400 MHz, DMSO-*d*<sub>6</sub>)δ: 7.23 (t, 2H, *J* = 5.88 Hz, Ar-H), 7.50 (d, 1H, *J* = 6.6 Hz, Ar-H), 6.68 (d, 1H, *J* = 15.4 Hz, COCH=CH), 7.7 (d, 2H, *J* = 8.04 Hz, Ar-H), 7.97 (d, 1H, *J* = 15.4 Hz, COCH=CH), 8.06 (d, 2H, *J* = 7.36 Hz, Ar-H), 8.33 (d, 1H, *J* = 6.96 Hz, Ar-H), 8.78 (s, 1H, Ar-H), 12.16 (s, 1H, NH); <sup>13</sup>C-NMR (100 MHz, DMSO-*d*<sub>6</sub>) δ: 112.2, 117.7, 121.7, 121.9, 123.2, 125.5, 125.8, 127.3, 128.9, 129.6, 135.2, 136.9, 137.6, 139.5, 183.1; IR (KBr, cm<sup>-1</sup>) ν<sub>max</sub>= 3128(NH), 3044(C-H), 2870, 1644(C=O), 1519(C=C), 1439, 1336, 1154, 794, 753; [Anal. Calcd. for C<sub>18</sub>H<sub>12</sub>F<sub>3</sub>NO: C, 68.57; H, 3.84; N, 4.44; Found: C, 68.75; H, 3.91; N, 4.49]; LC/MS (ESI, *m/z*): 315.10 [M<sup>+</sup>] for 315.0 C<sub>18</sub>H<sub>12</sub>F<sub>3</sub>NO.

*(E)*-1-(1-*H*-Indol-3-yl)-3-(thiophen-2-yl)prop-2-en-1-one (**1l**)

Yellow powder; m.p: 209-211°C; <sup>1</sup>H-NMR (400 MHz, DMSO-*d*<sub>6</sub>) δ: 7.14 – 7.25 (t, 1H, *J* = 4.40 Hz, Ar-H), 7.18 – 7.25 (m, 2H, Ar-H), 7.47 – 7.51 (m, 2H, Ar-H & COCH=CH), 7.58 (d, 1H, *J* = 3.64 Hz, Ar-H), 7.69 (d, 1H, *J* = 5.12 Hz, Ar-H), 7.79 (d, 1H, *J* = 15.4 Hz, COCH=CH), 8.32 (d, 1H, *J* = 6.6 Hz, Ar-H), 8.65 (s, 1H, Ar-H), 12.09 (s, 1H, NH); <sup>13</sup>C-NMR (100 MHz, DMSO-*d*<sub>6</sub>) δ: 112.1, 117.4, 121.7, 121.8, 123.0, 123.2, 125.8, 128.4, 128.8, 131.1, 132.4, 134.5, 136.8, 140.2, 183.1; IR (KBr, cm<sup>-1</sup>) ν<sub>max</sub>= 3432(NH), 3094(C-H), 2921, 1632(C=O), 1581(C=C), 1491, 1198, 428; [Anal. Calcd. for C<sub>15</sub>H<sub>11</sub>NOS: C, 78.57; H, 4.76; N, 5.67; S, 6.00; Found: C, 78.57; H, 4.76; N, 5.67; S, 6.00].

71.12; H, 4.38; N, 5.53; Found: C, 71.21; H, 4.43; N, 5.49]; LC/MS (ESI,  $m/z$ ): 253.10 [M<sup>+</sup>] for 253.06 C<sub>15</sub>H<sub>11</sub>NOS.

(*E*)-3-(Furan-2-yl)-1-(1-*H*-indol-3-yl)prop-2-en-1-one (**1m**)

Yellow powder; m.p: 157-159 °C; <sup>1</sup>H-NMR (400 MHz, DMSO-*d*<sub>6</sub>)  $\delta$ : 6.64 (t, 1H,  $J = 5.12$  Hz, Ar-H), 6.97 (d, 1H,  $J = 3.64$  Hz, Ar-H), 7.18 – 7.23 (m, 2H, Ar-H), 7.44 – 7.53 (m, 3H, Ar-H & COCH=CH), 7.84 (s, 1H, Ar-H), 8.32 (d, 1H,  $J = 16.12$  Hz, COCH=CH), 8.61 (d, 1H,  $J = 2.96$  Hz, Ar-H), 12.08 (s, 1H, NH); <sup>13</sup>C-NMR (100 MHz, DMSO-*d*<sub>6</sub>)  $\delta$ : 112.1, 112.7, 114.8, 117.5, 121.7, 121.75, 121.8, 123.1, 125.8, 126.6, 134.3, 136.8, 145.1, 151.5, 183.1; IR (KBr, cm<sup>-1</sup>)  $\nu_{\max} = 3434$ (NH), 3041(C-H), 2917, 1621(C=O), 1548(C=C), 1428, 1155, 771, 452; [Anal. Calcd. for C<sub>15</sub>H<sub>11</sub>NO<sub>2</sub>: C, 75.94; H, 4.67; N, 5.96; Found: C, 75.90; H, 4.91; N, 5.49]; LC/MS (ESI,  $m/z$ ): 237.10[M<sup>+</sup>] for 237.08 C<sub>15</sub>H<sub>11</sub>NO<sub>2</sub>.

(*E*)-1-(1-*H*-Indol-3-yl)-3-(3,4,5-trimethoxyphenyl)prop-2-en-1-one (**1n**)

Yellow powder; m.p: 217-219 °C; <sup>1</sup>H-NMR (400 MHz, DMSO-*d*<sub>6</sub>)  $\delta$ : 3.68 (s, 3H, OCH<sub>3</sub>), 3.87 (s, 6H, 2xOCH<sub>3</sub>), 7.17 (s, 3H, Ar-H), 7.22 (t, 1H,  $J = 7.32$  Hz, Ar-H), 7.50 (d, 1H,  $J = 7.32$  Hz, Ar-H), 7.58 (d, 1H,  $J = 15.4$  Hz, COCH=CH), 7.74 (d, 1H,  $J = 15.4$  Hz, COCH=CH), 8.34 (d, 1H,  $J = 7.32$  Hz, Ar-H), 8.73 (s, 1H, Ar-H), 12.10 (s, 1H, NH); <sup>13</sup>C-NMR (100 MHz, DMSO-*d*<sub>6</sub>)  $\delta$ : 56.1, 60.1, 106.0, 112.2, 121.7, 121.7, 123.0, 123.8, 125.8, 130.7, 134.6, 139.0, 139.9, 153.0, 183.2; IR (KBr, cm<sup>-1</sup>)  $\nu_{\max} = 3214$ (NH), 3115(C-H), 2830, 1641(C=O), 1582(C=C), 1506, 1421, 1266, 1185, 1128, 969, 575; [Anal. Calcd. for C<sub>20</sub>H<sub>19</sub>NO<sub>4</sub>: C, 71.20; H, 5.68; N, 4.15; Found: C, 71.77; H, 5.51; N, 4.44]; LC/MS (ESI,  $m/z$ ): 337.10[M<sup>+</sup>] for 337.13 C<sub>20</sub>H<sub>19</sub>NO<sub>4</sub>.

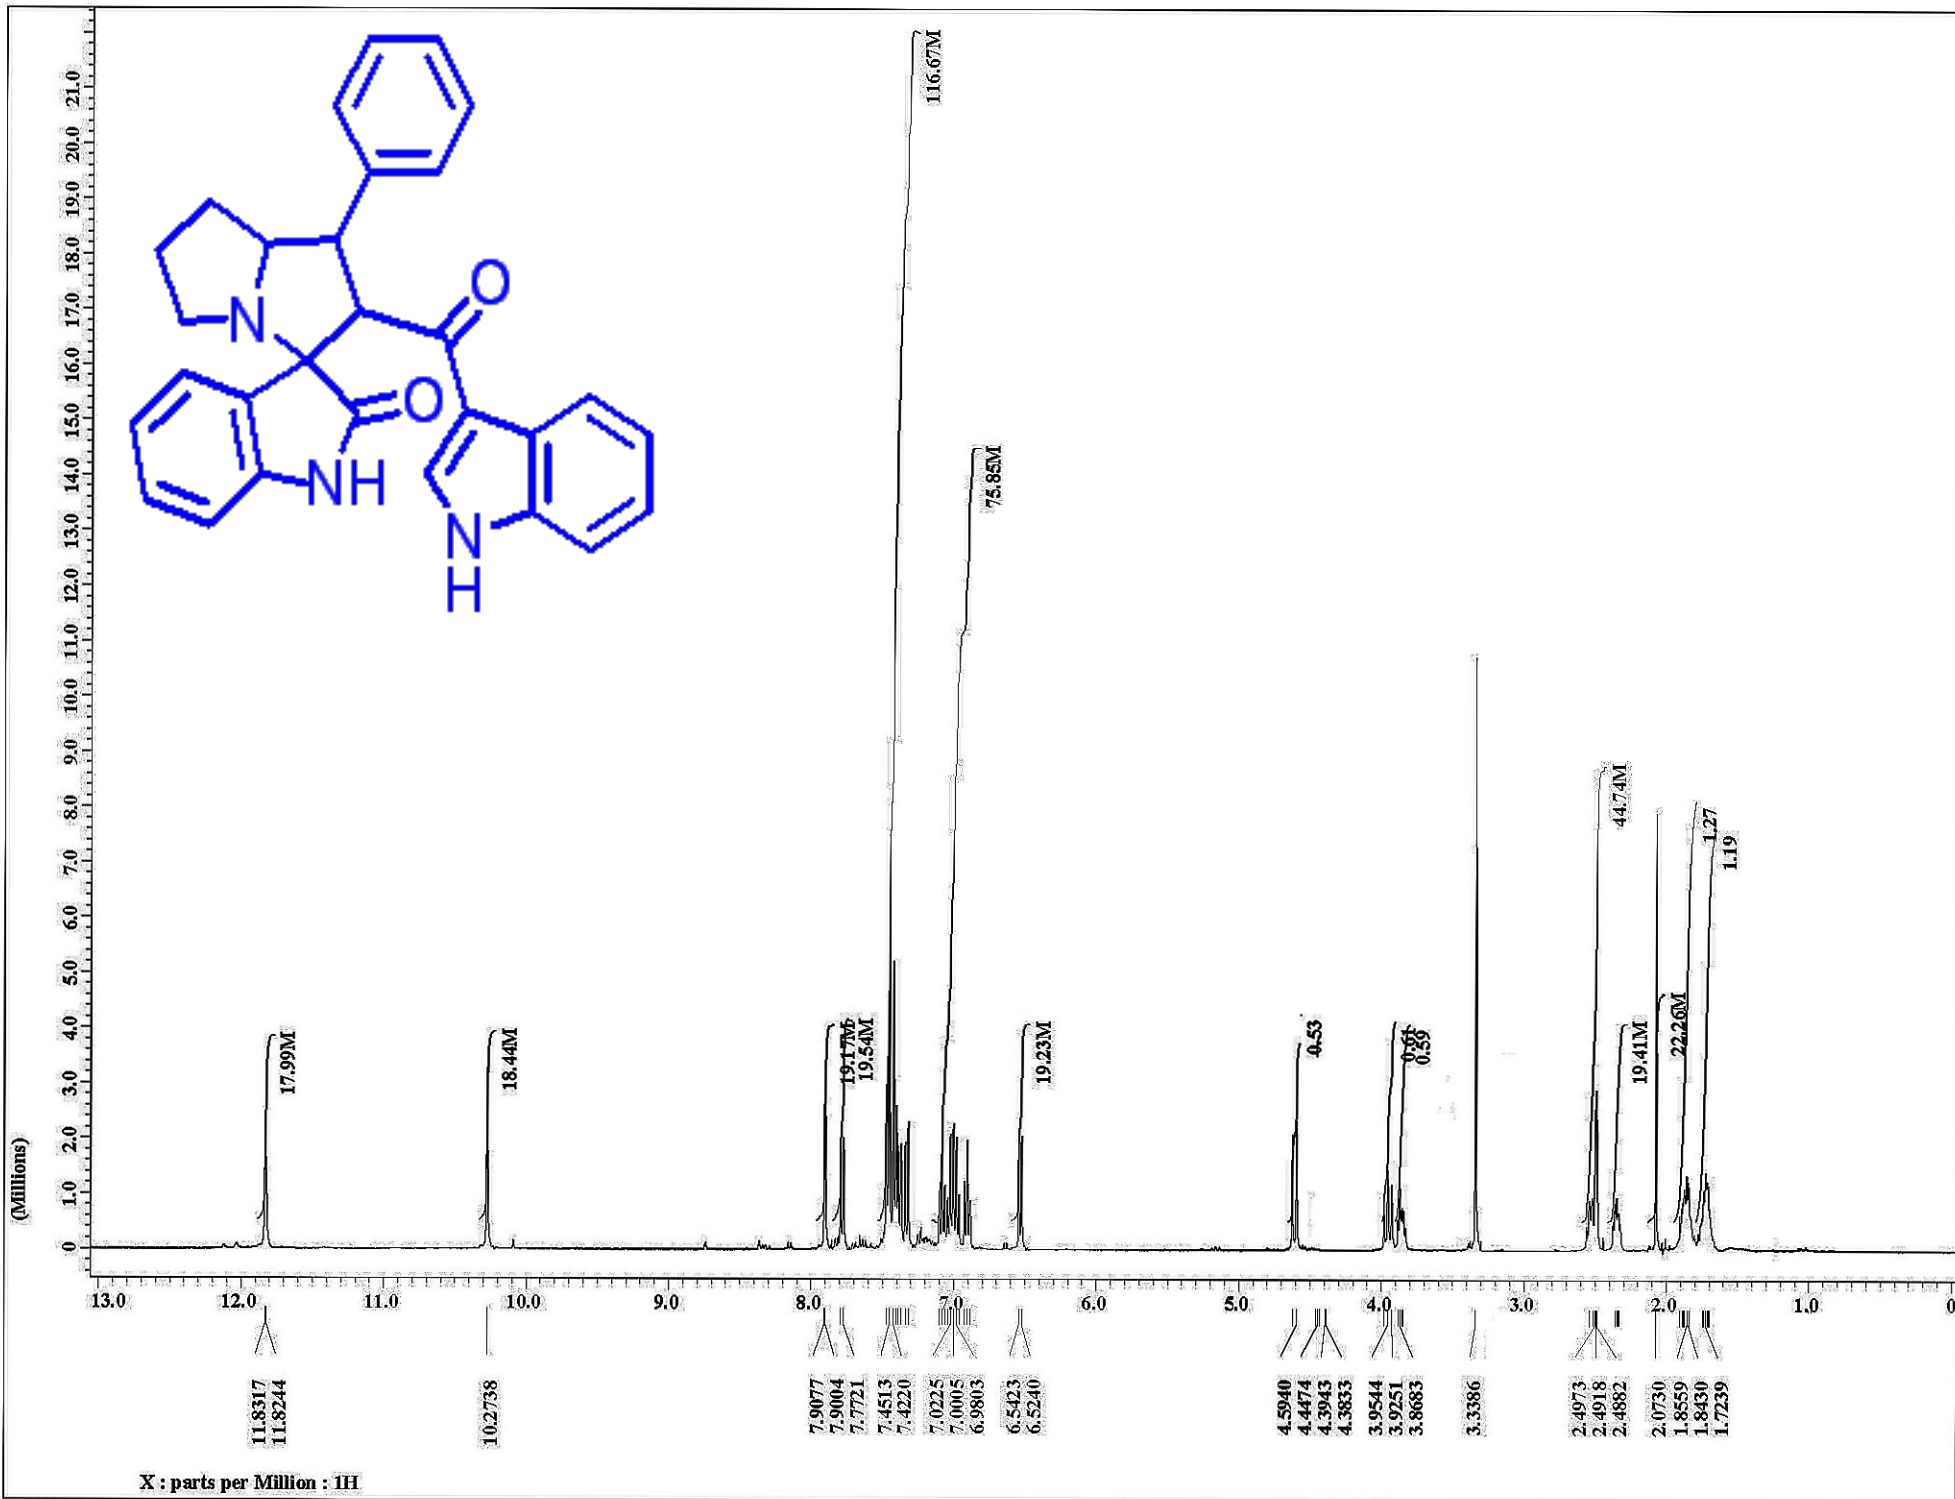

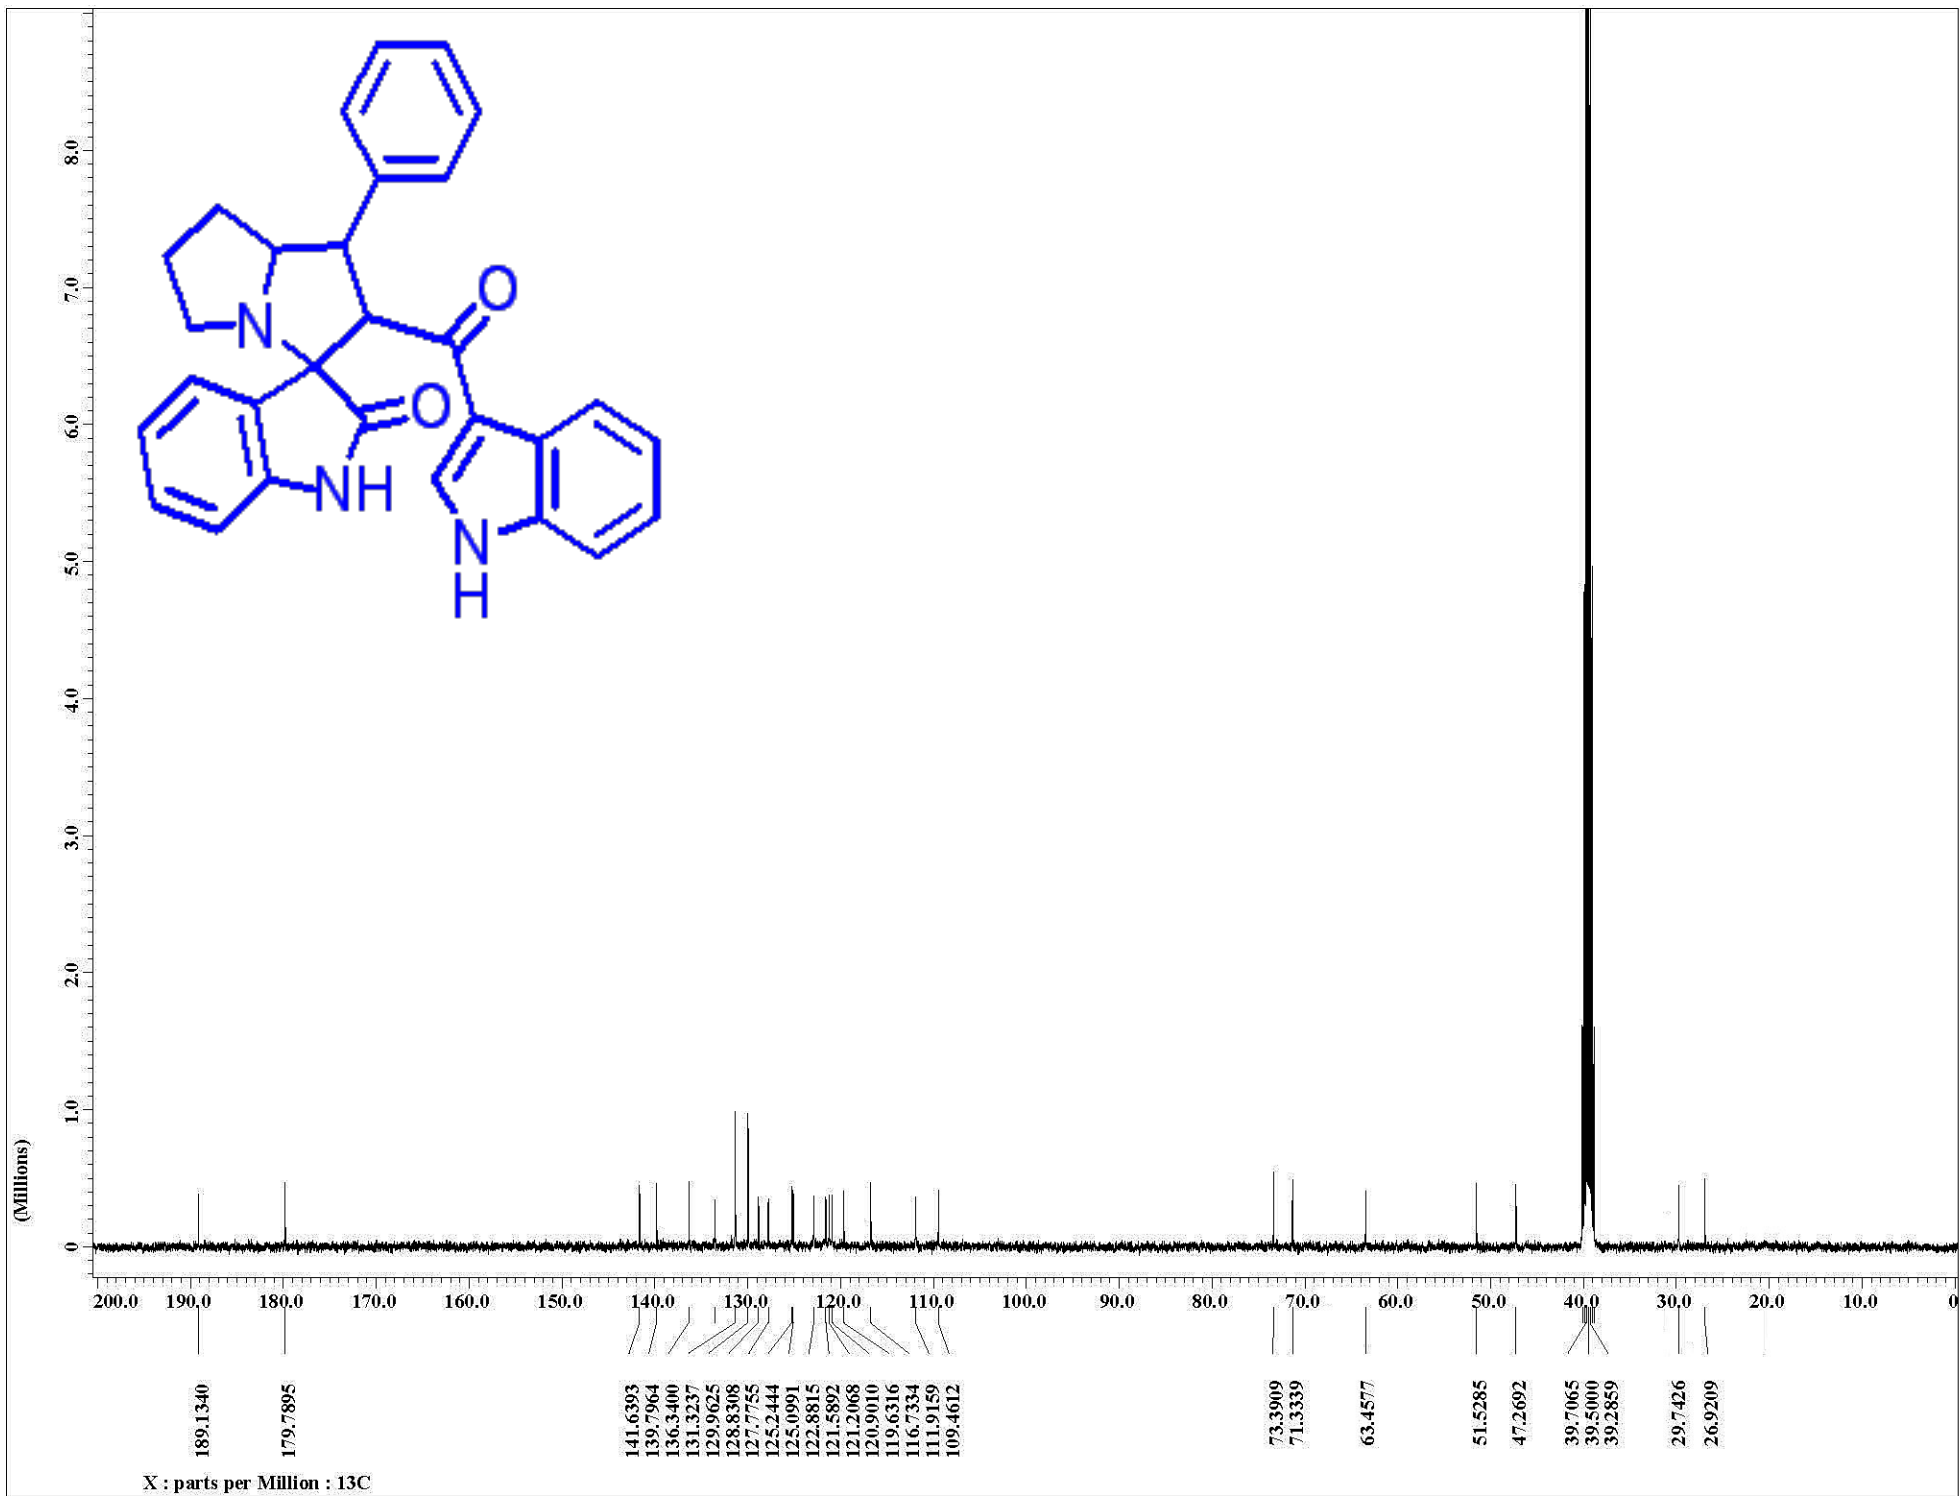



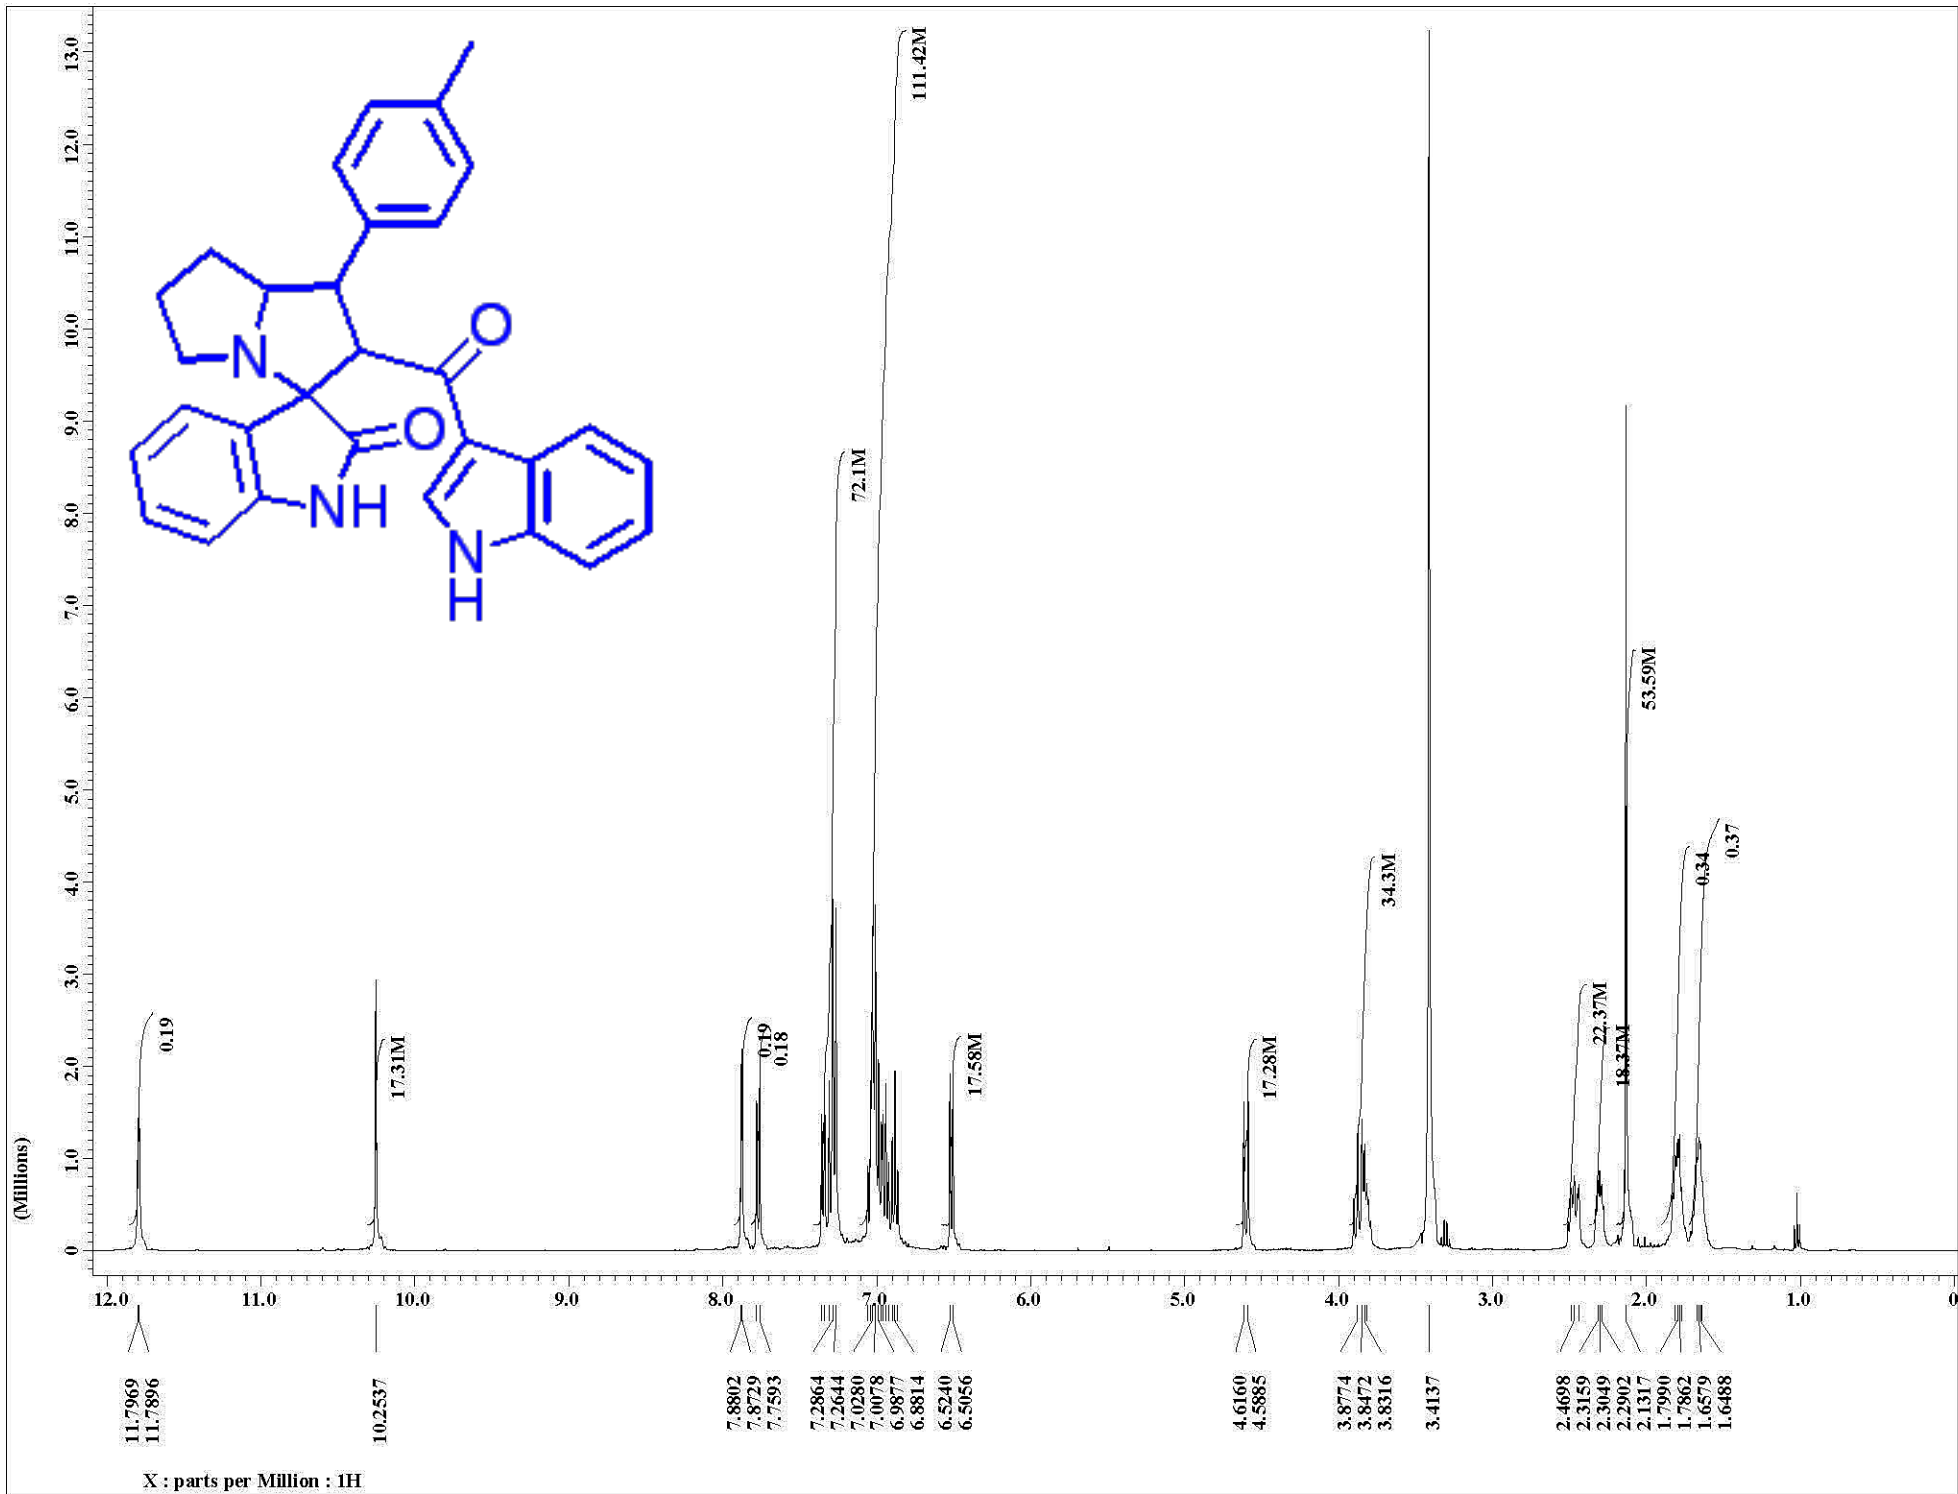

X : parts per Million : 1H

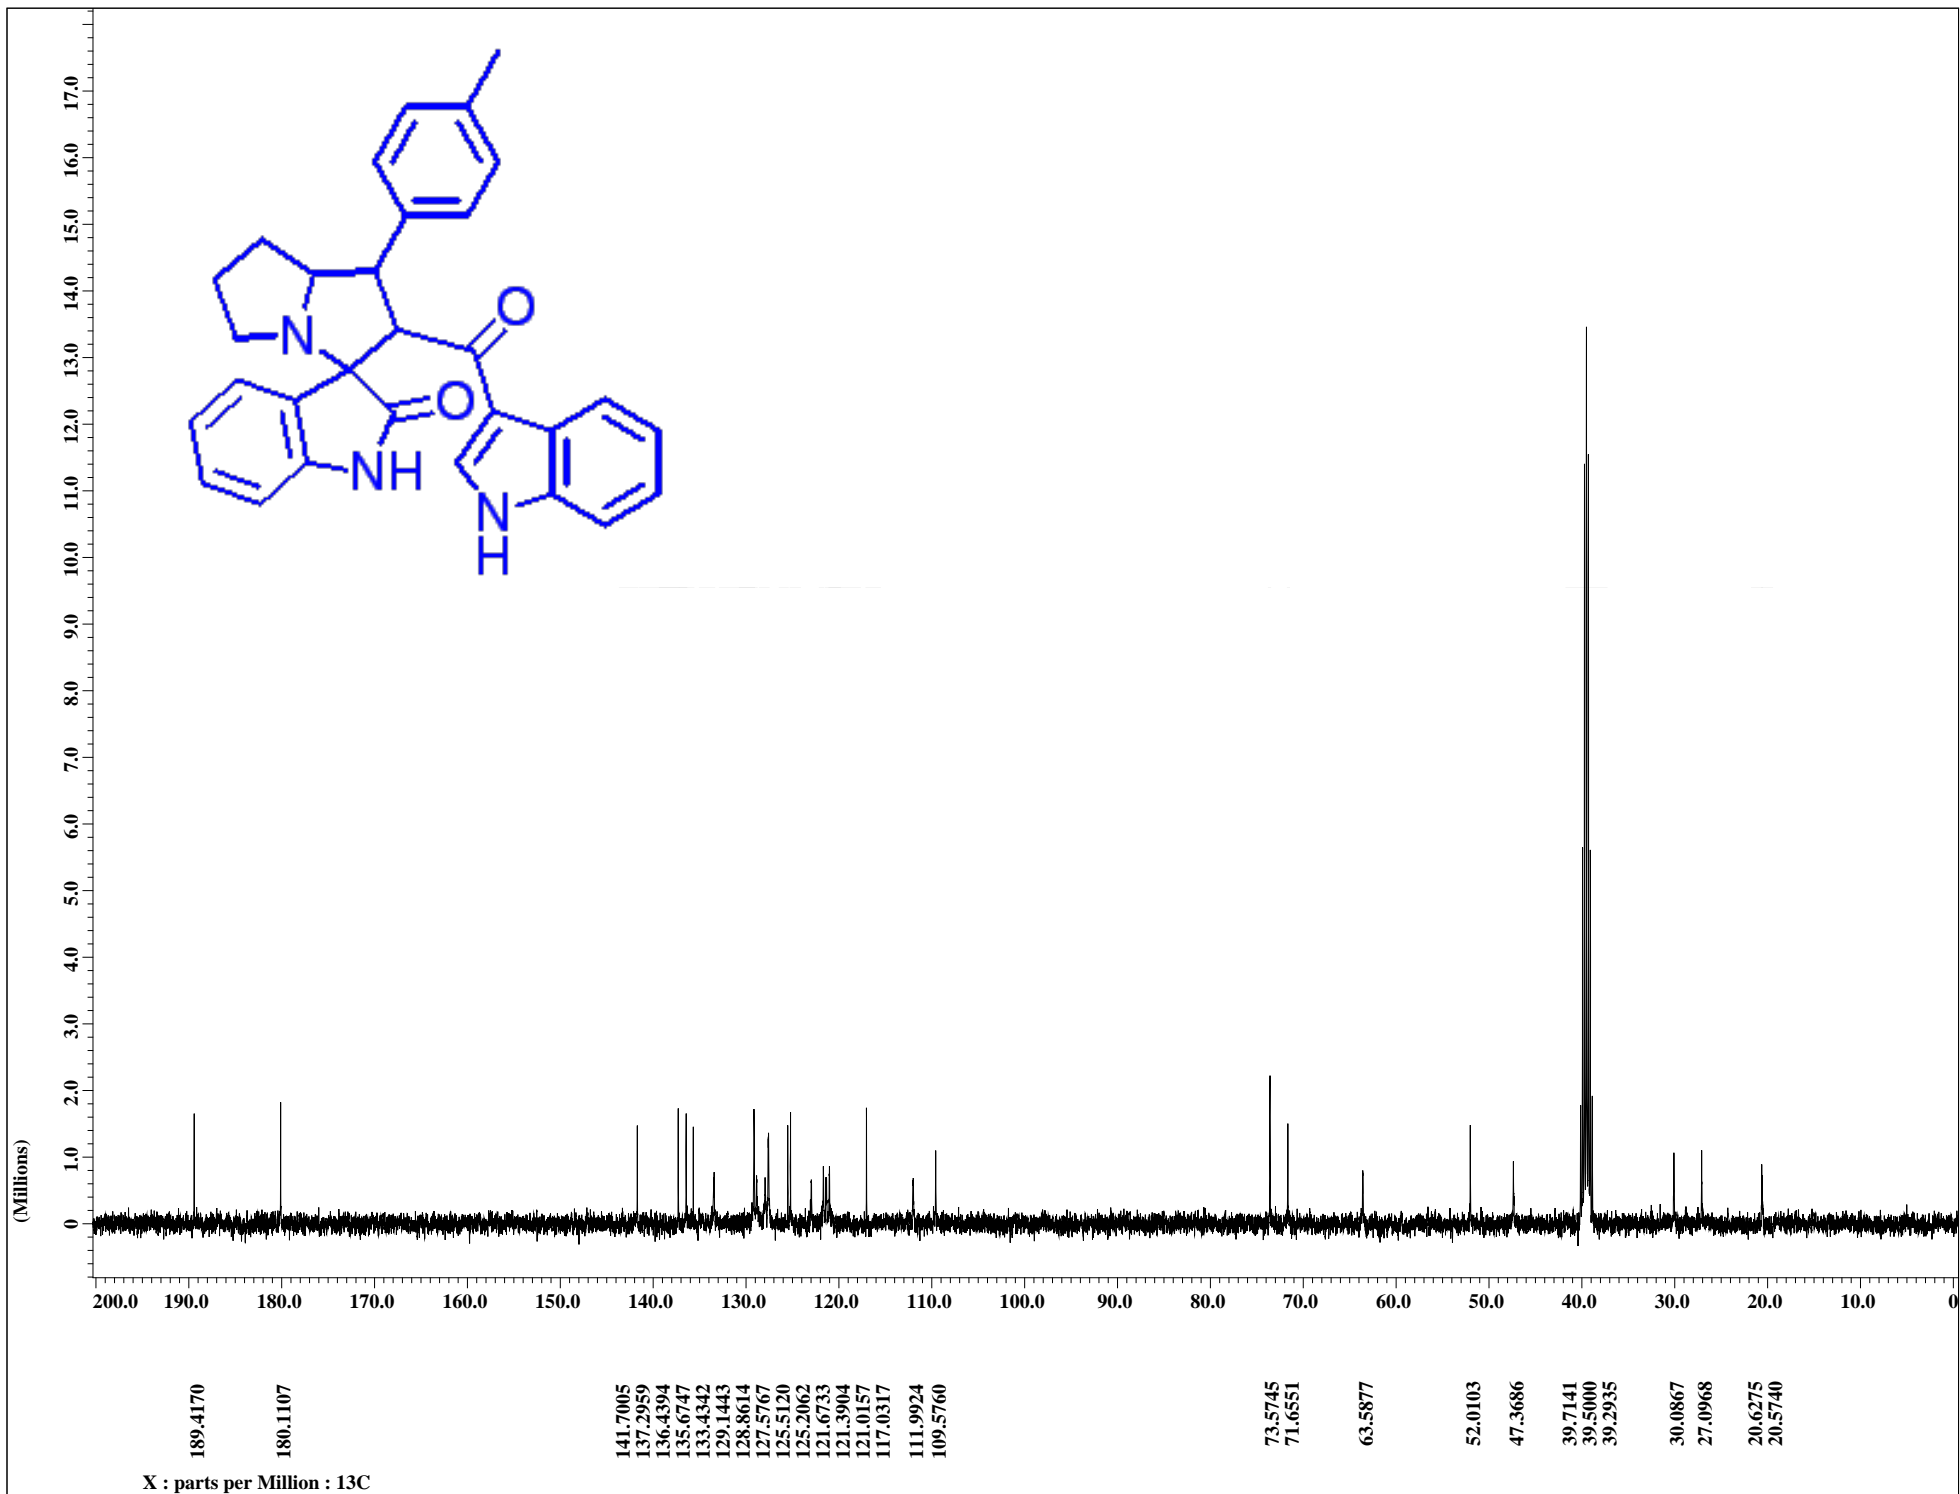

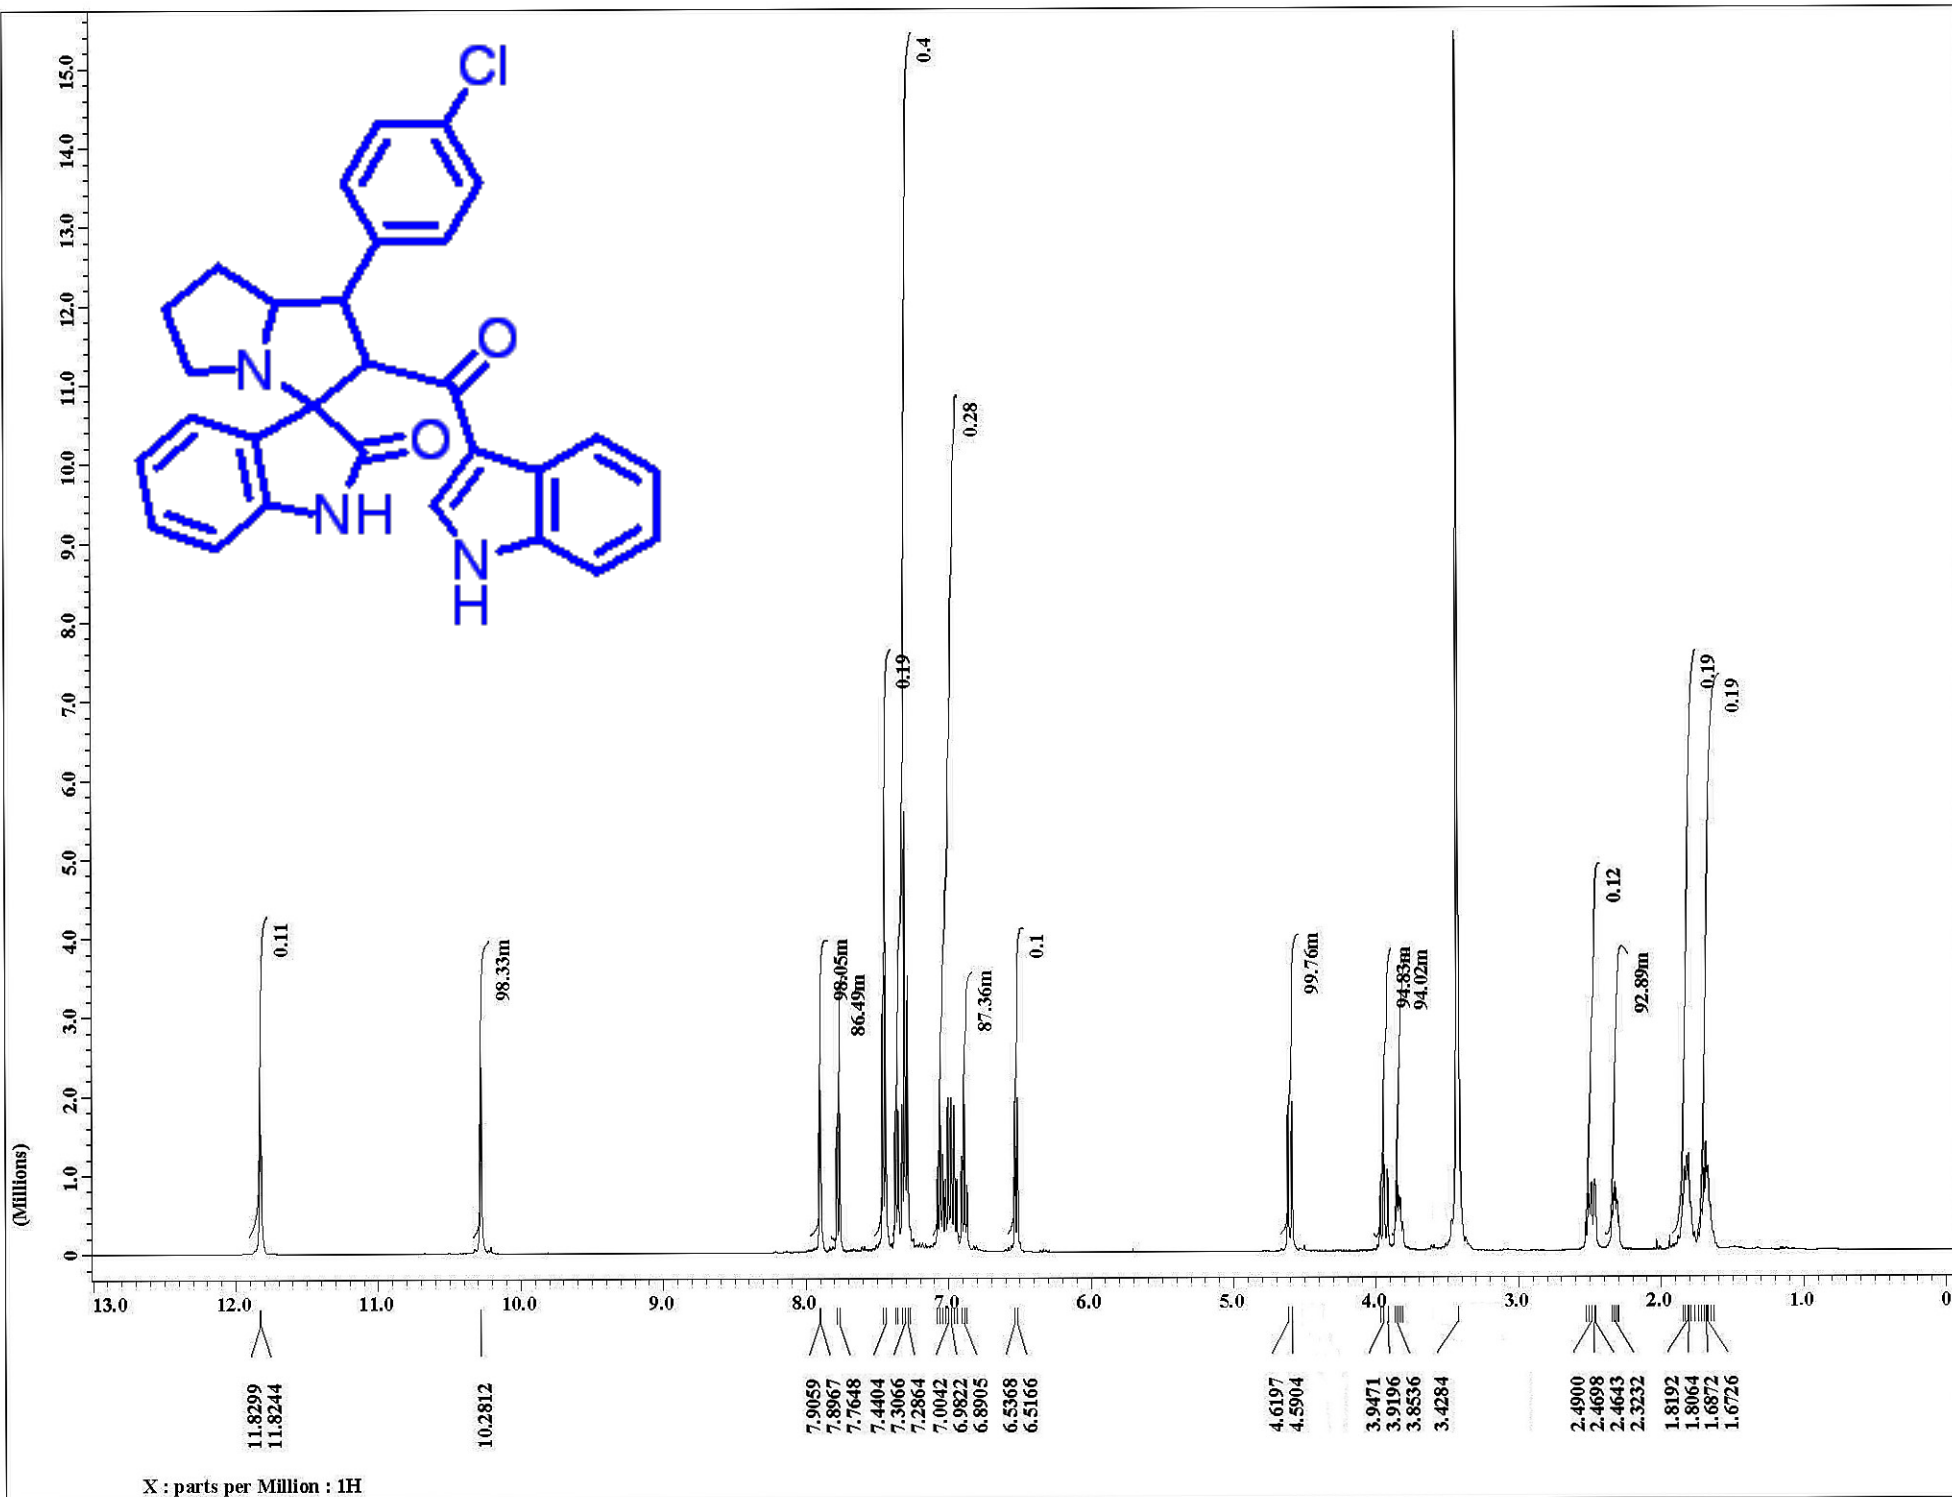

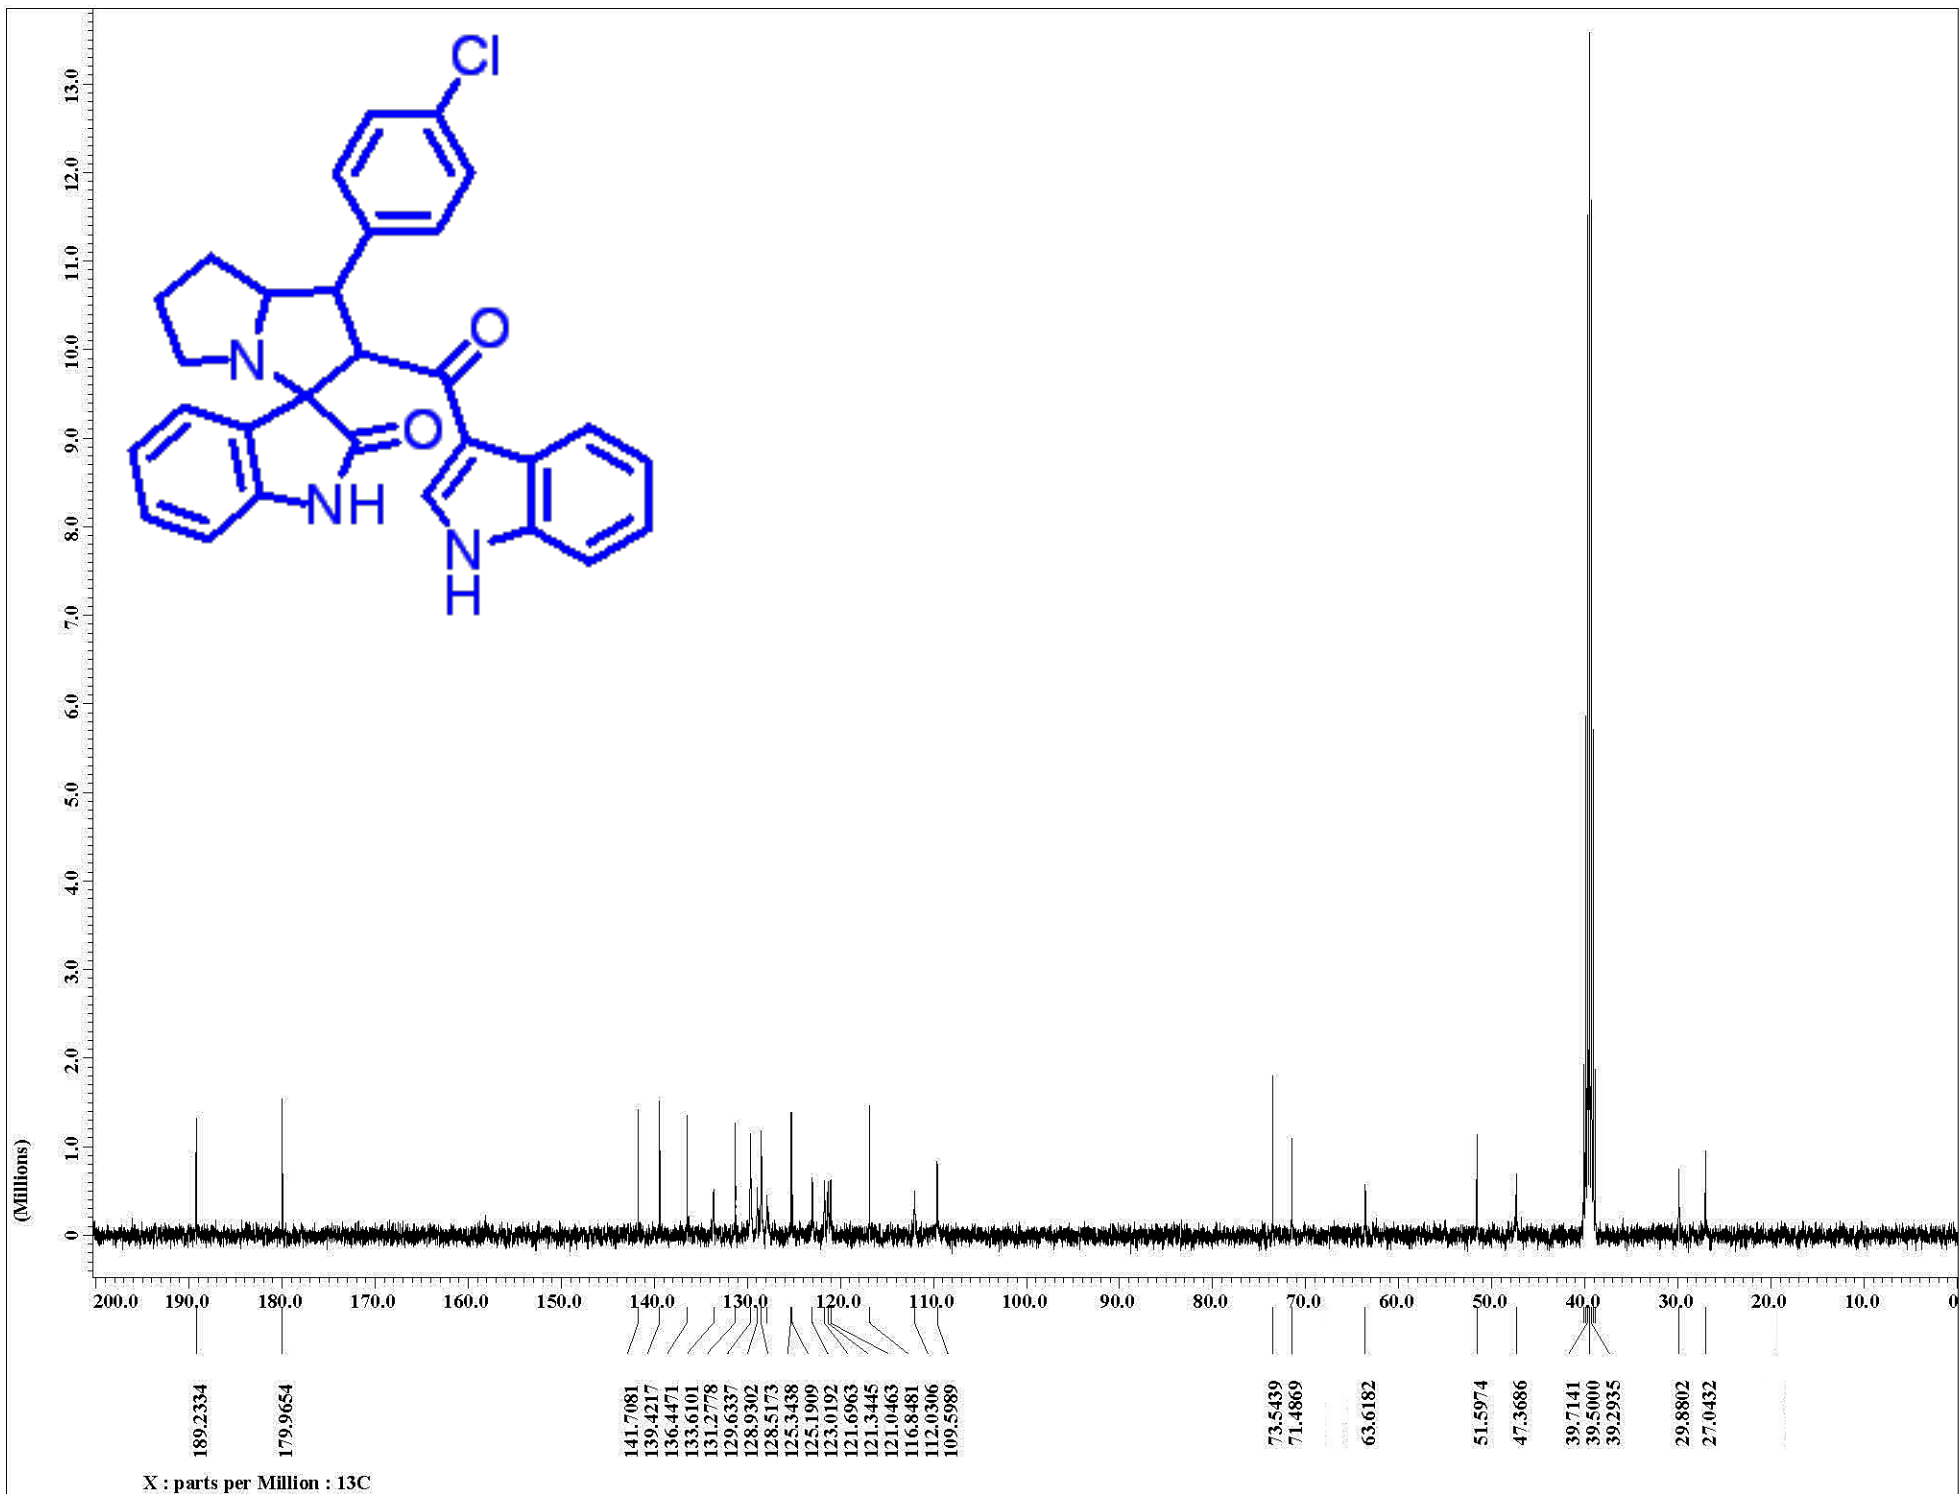

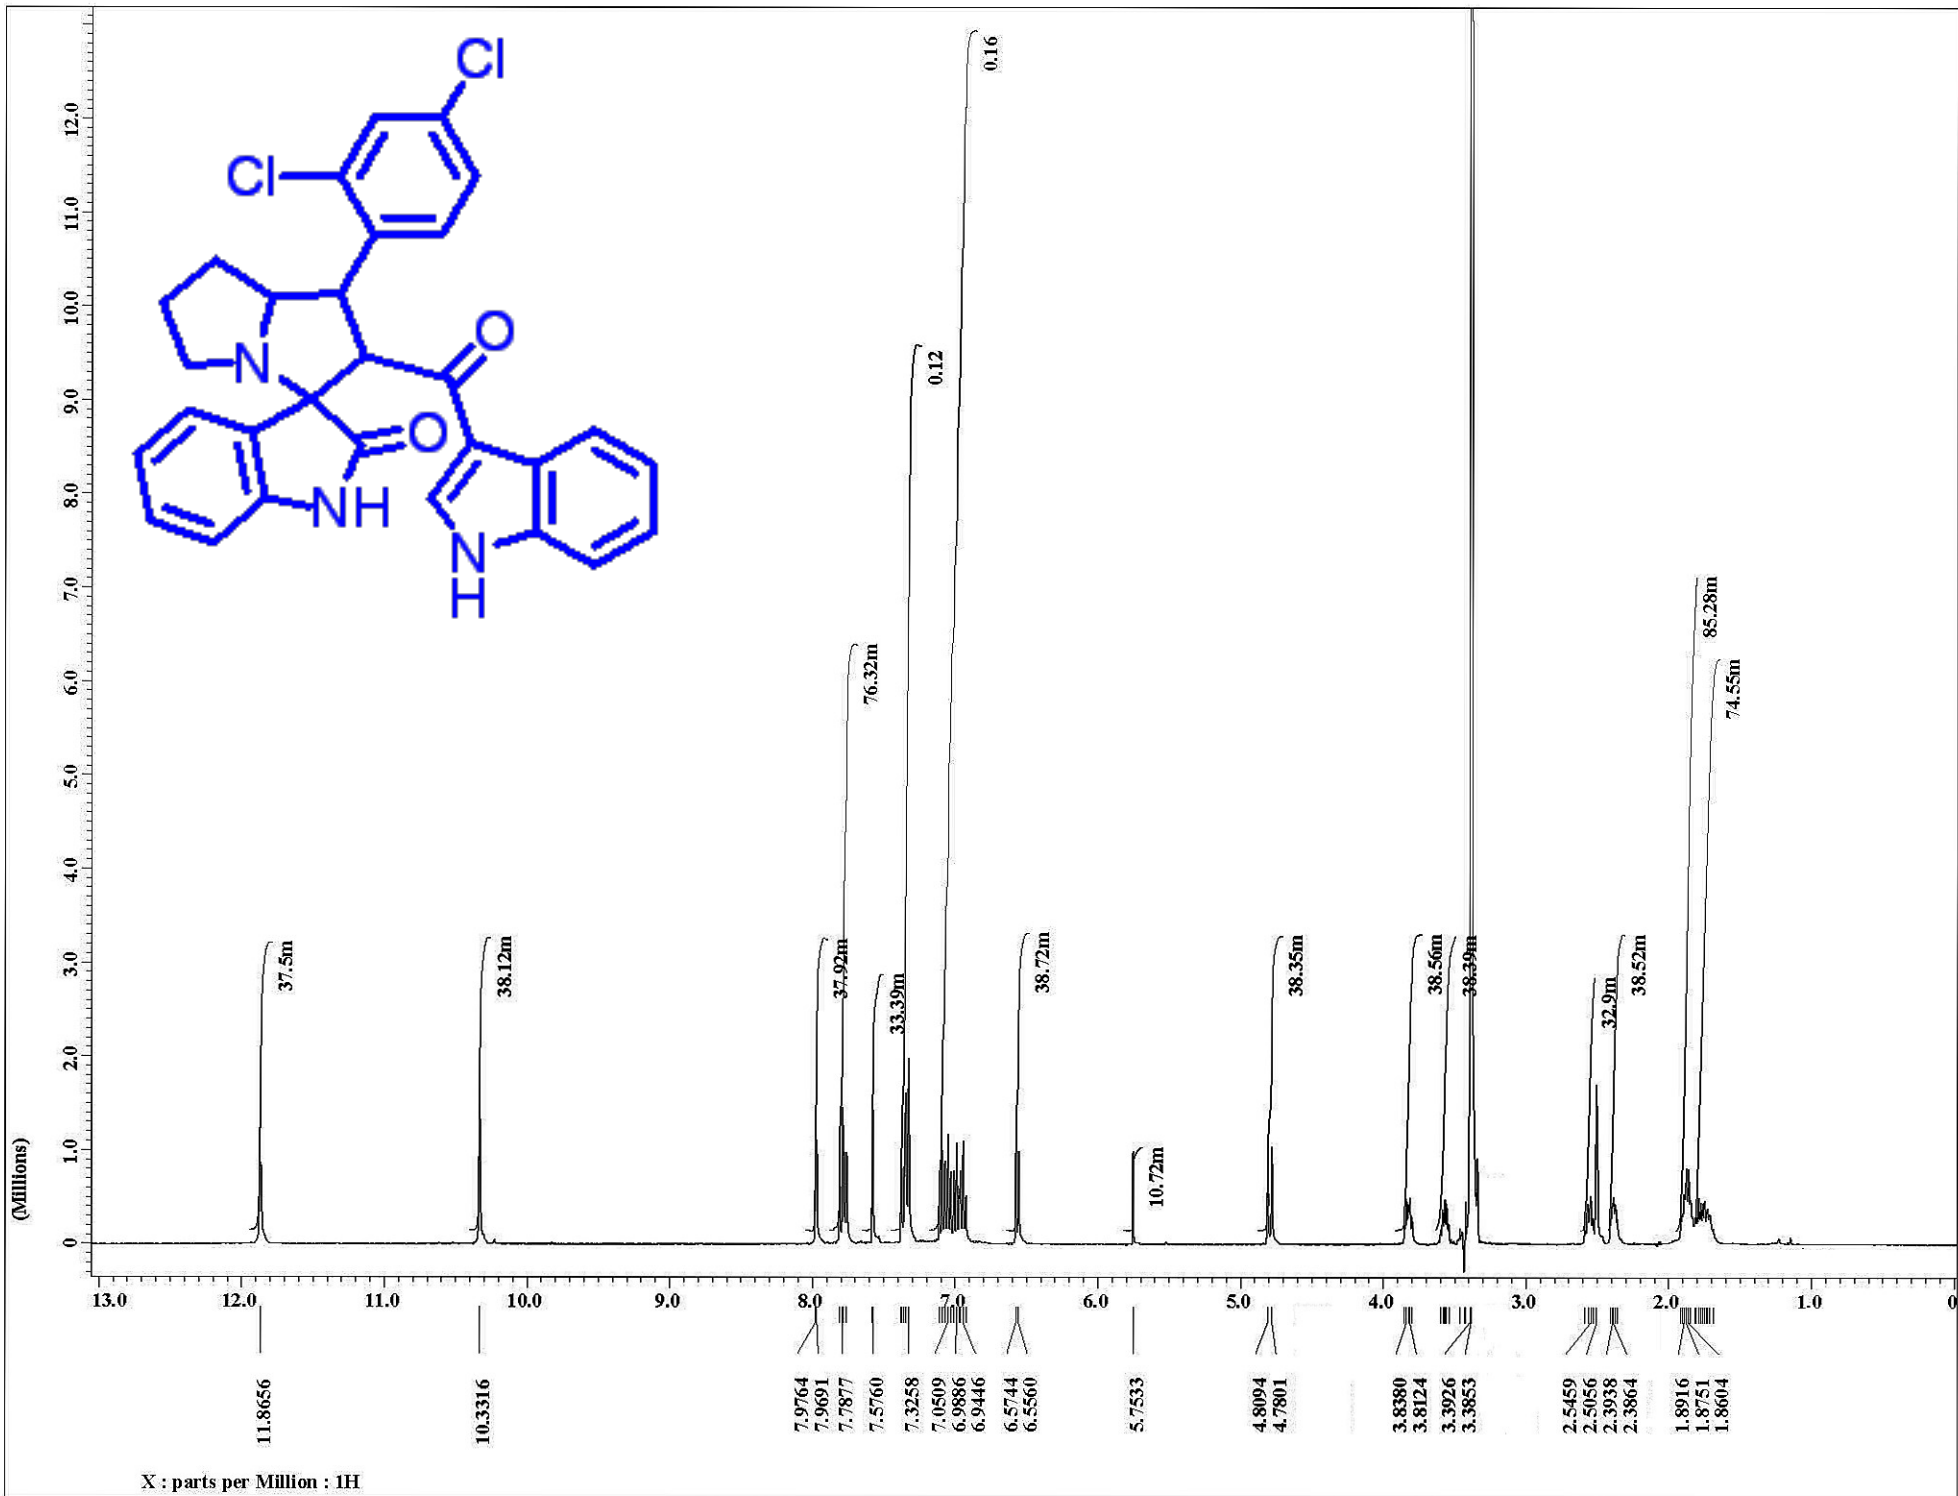

X : parts per Million : 1H

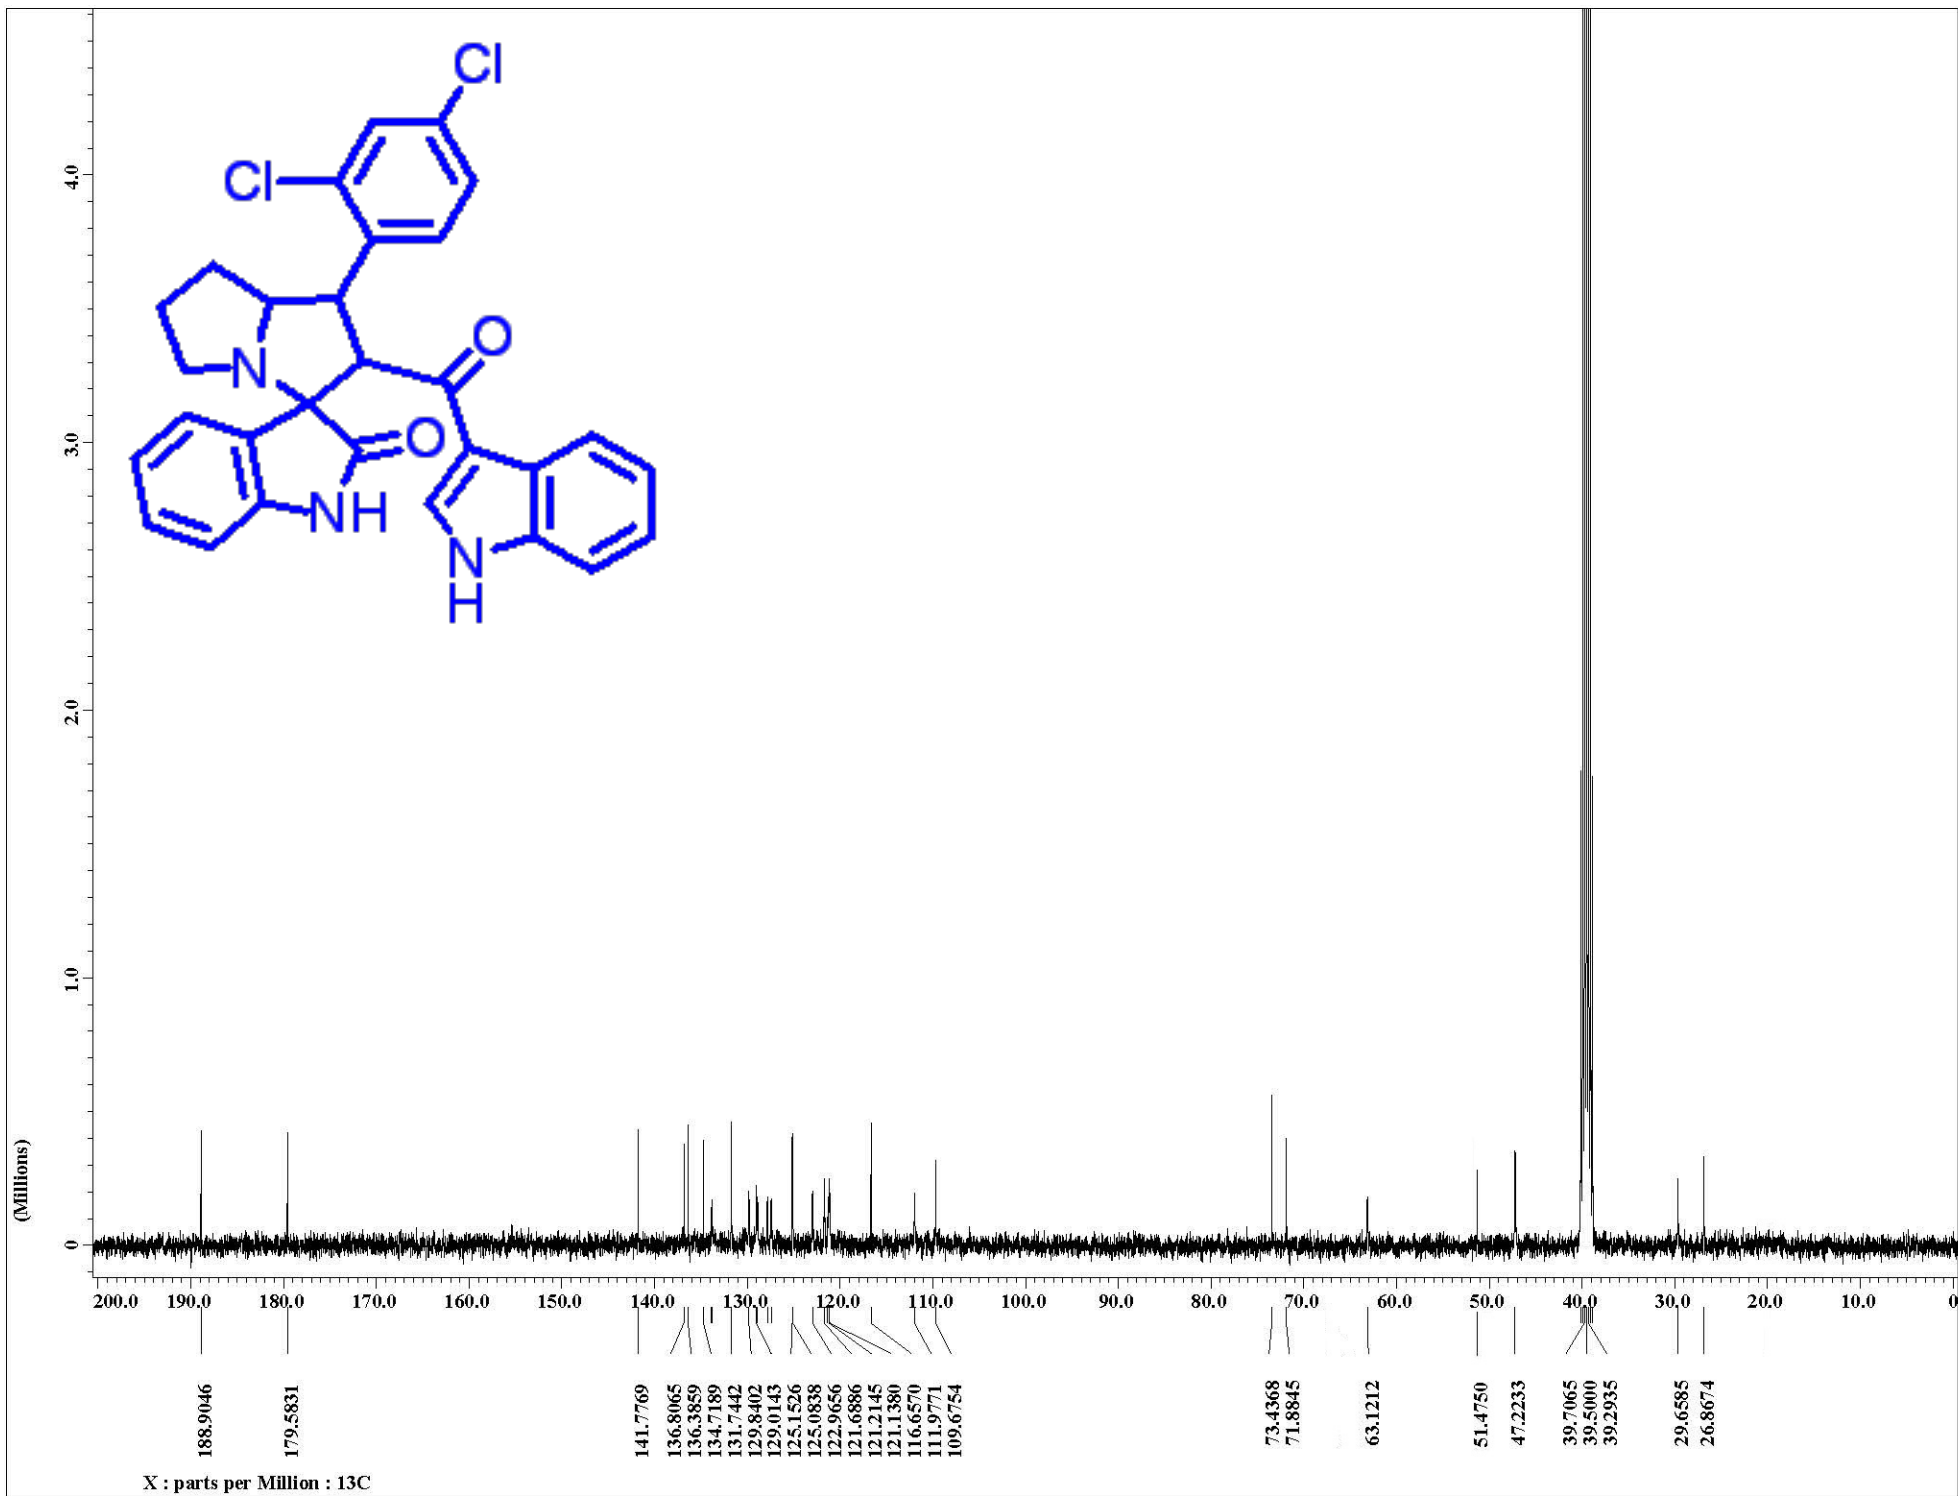

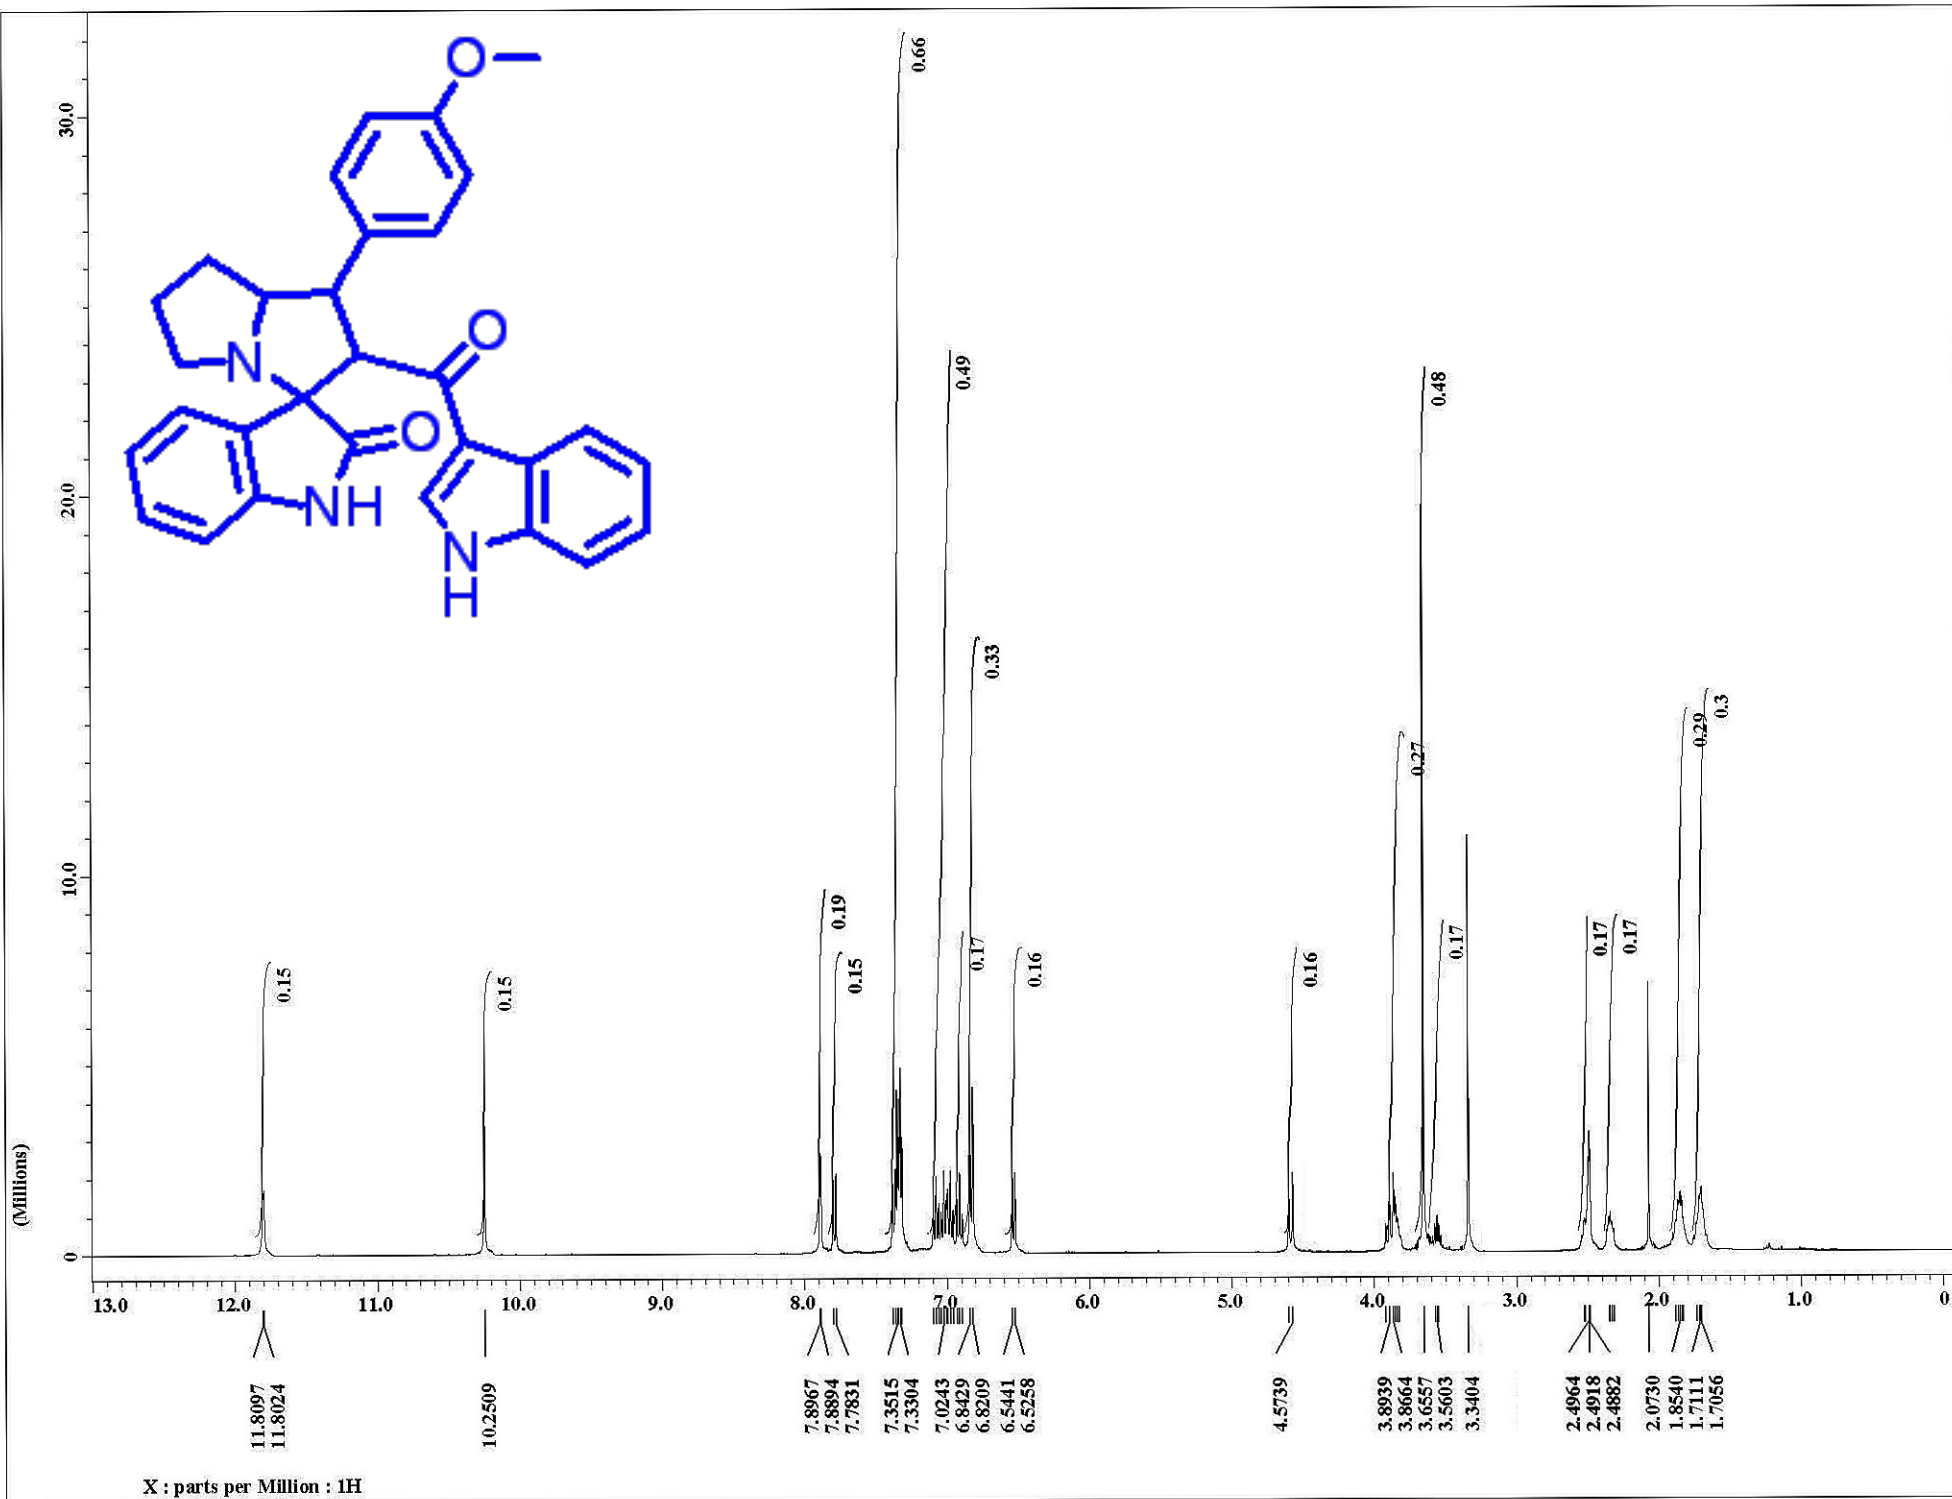

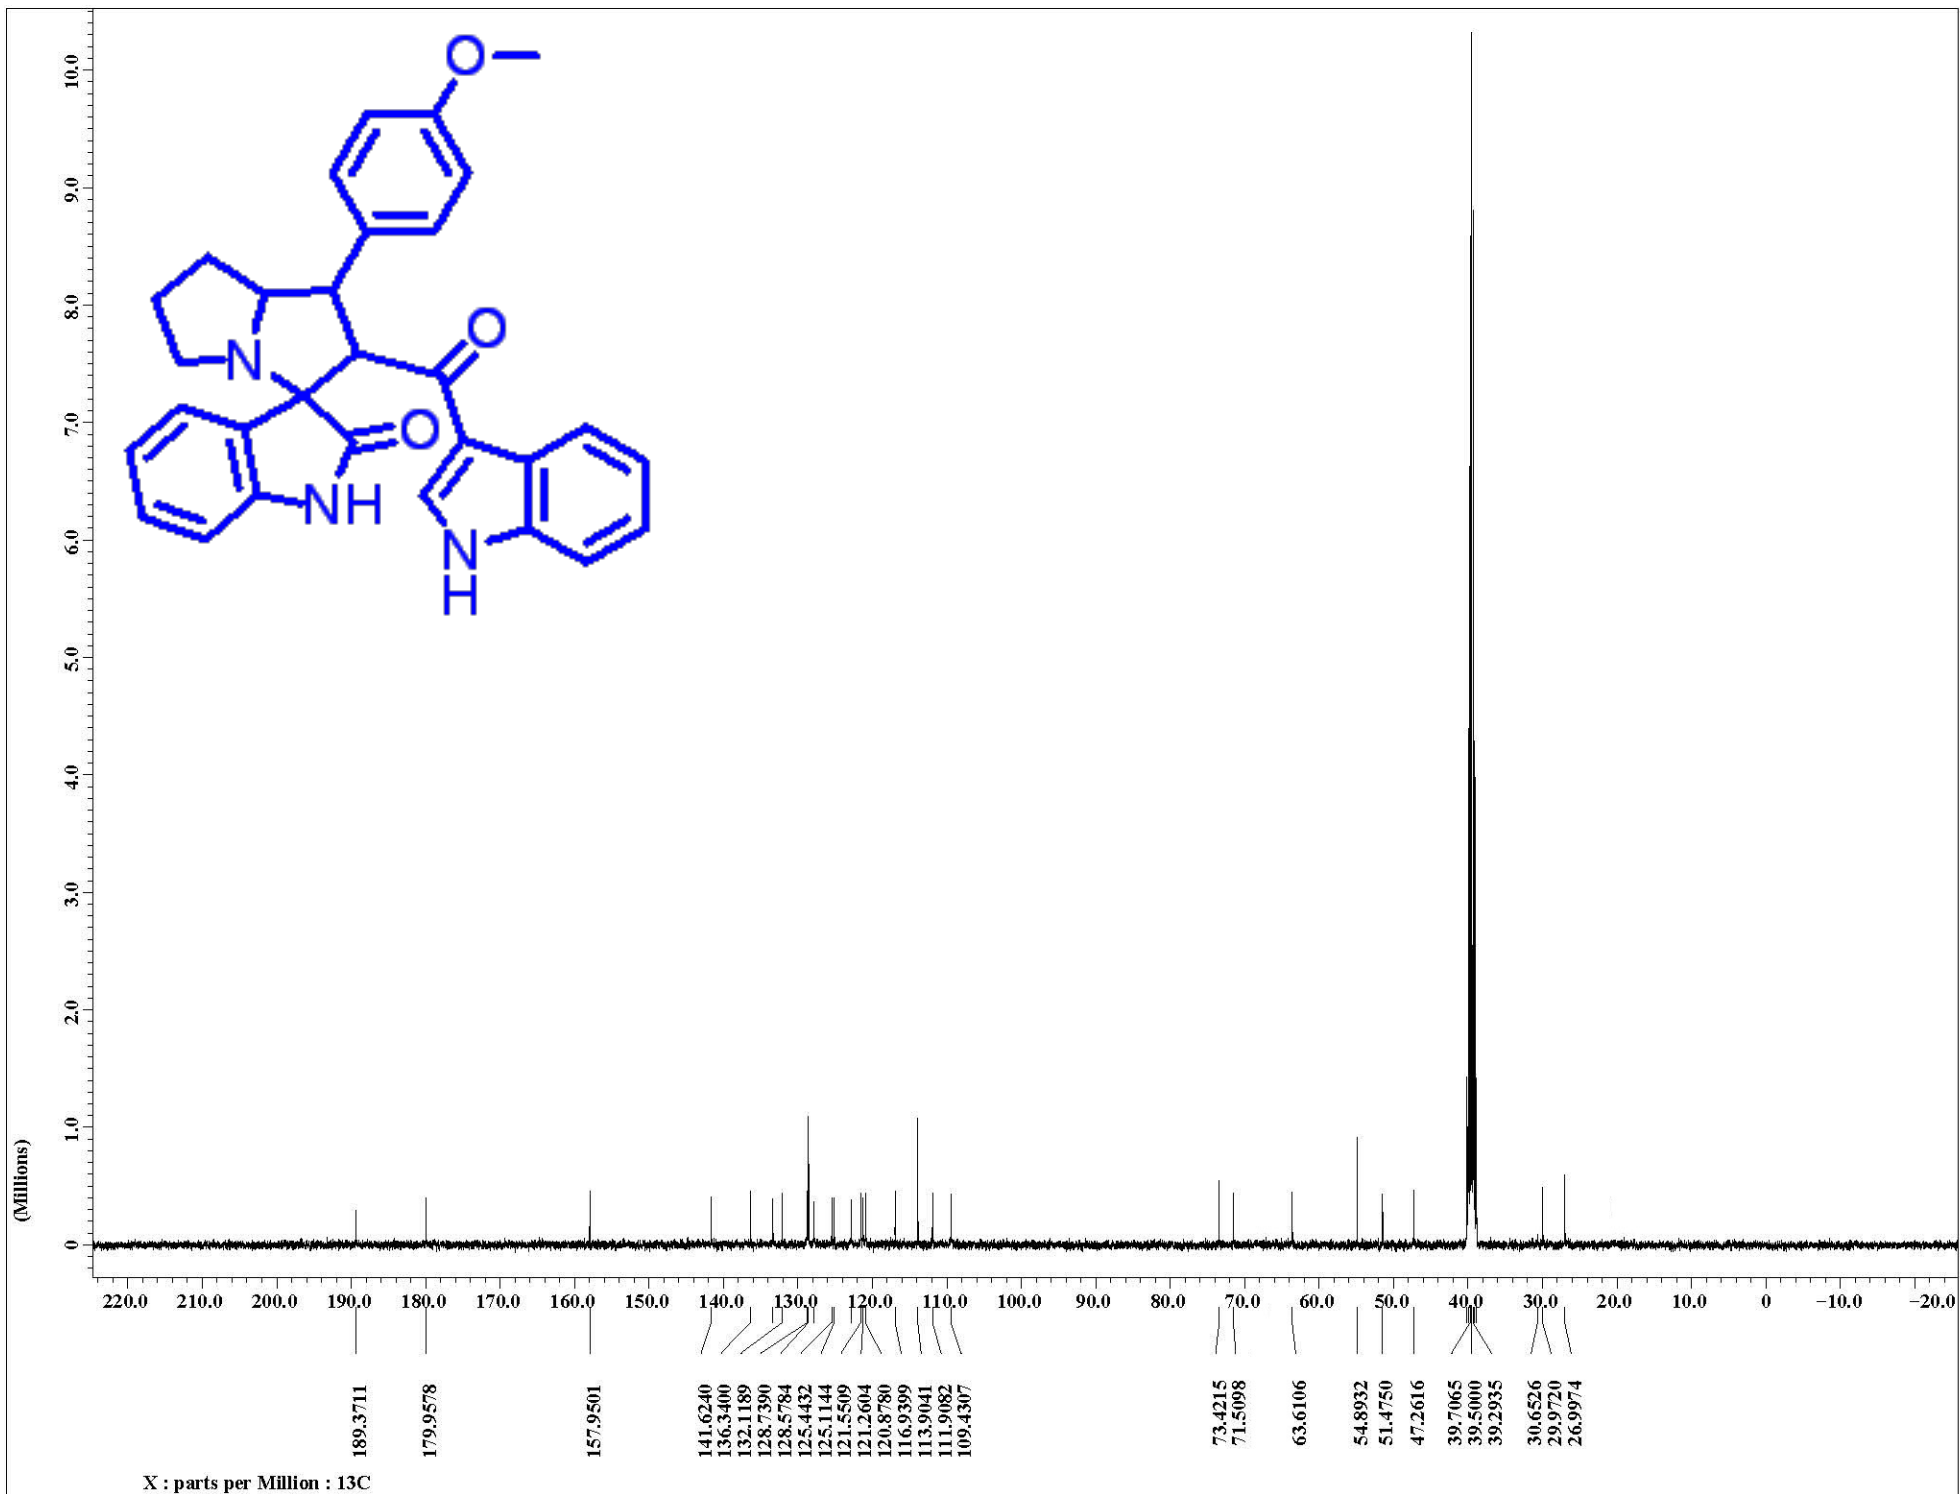



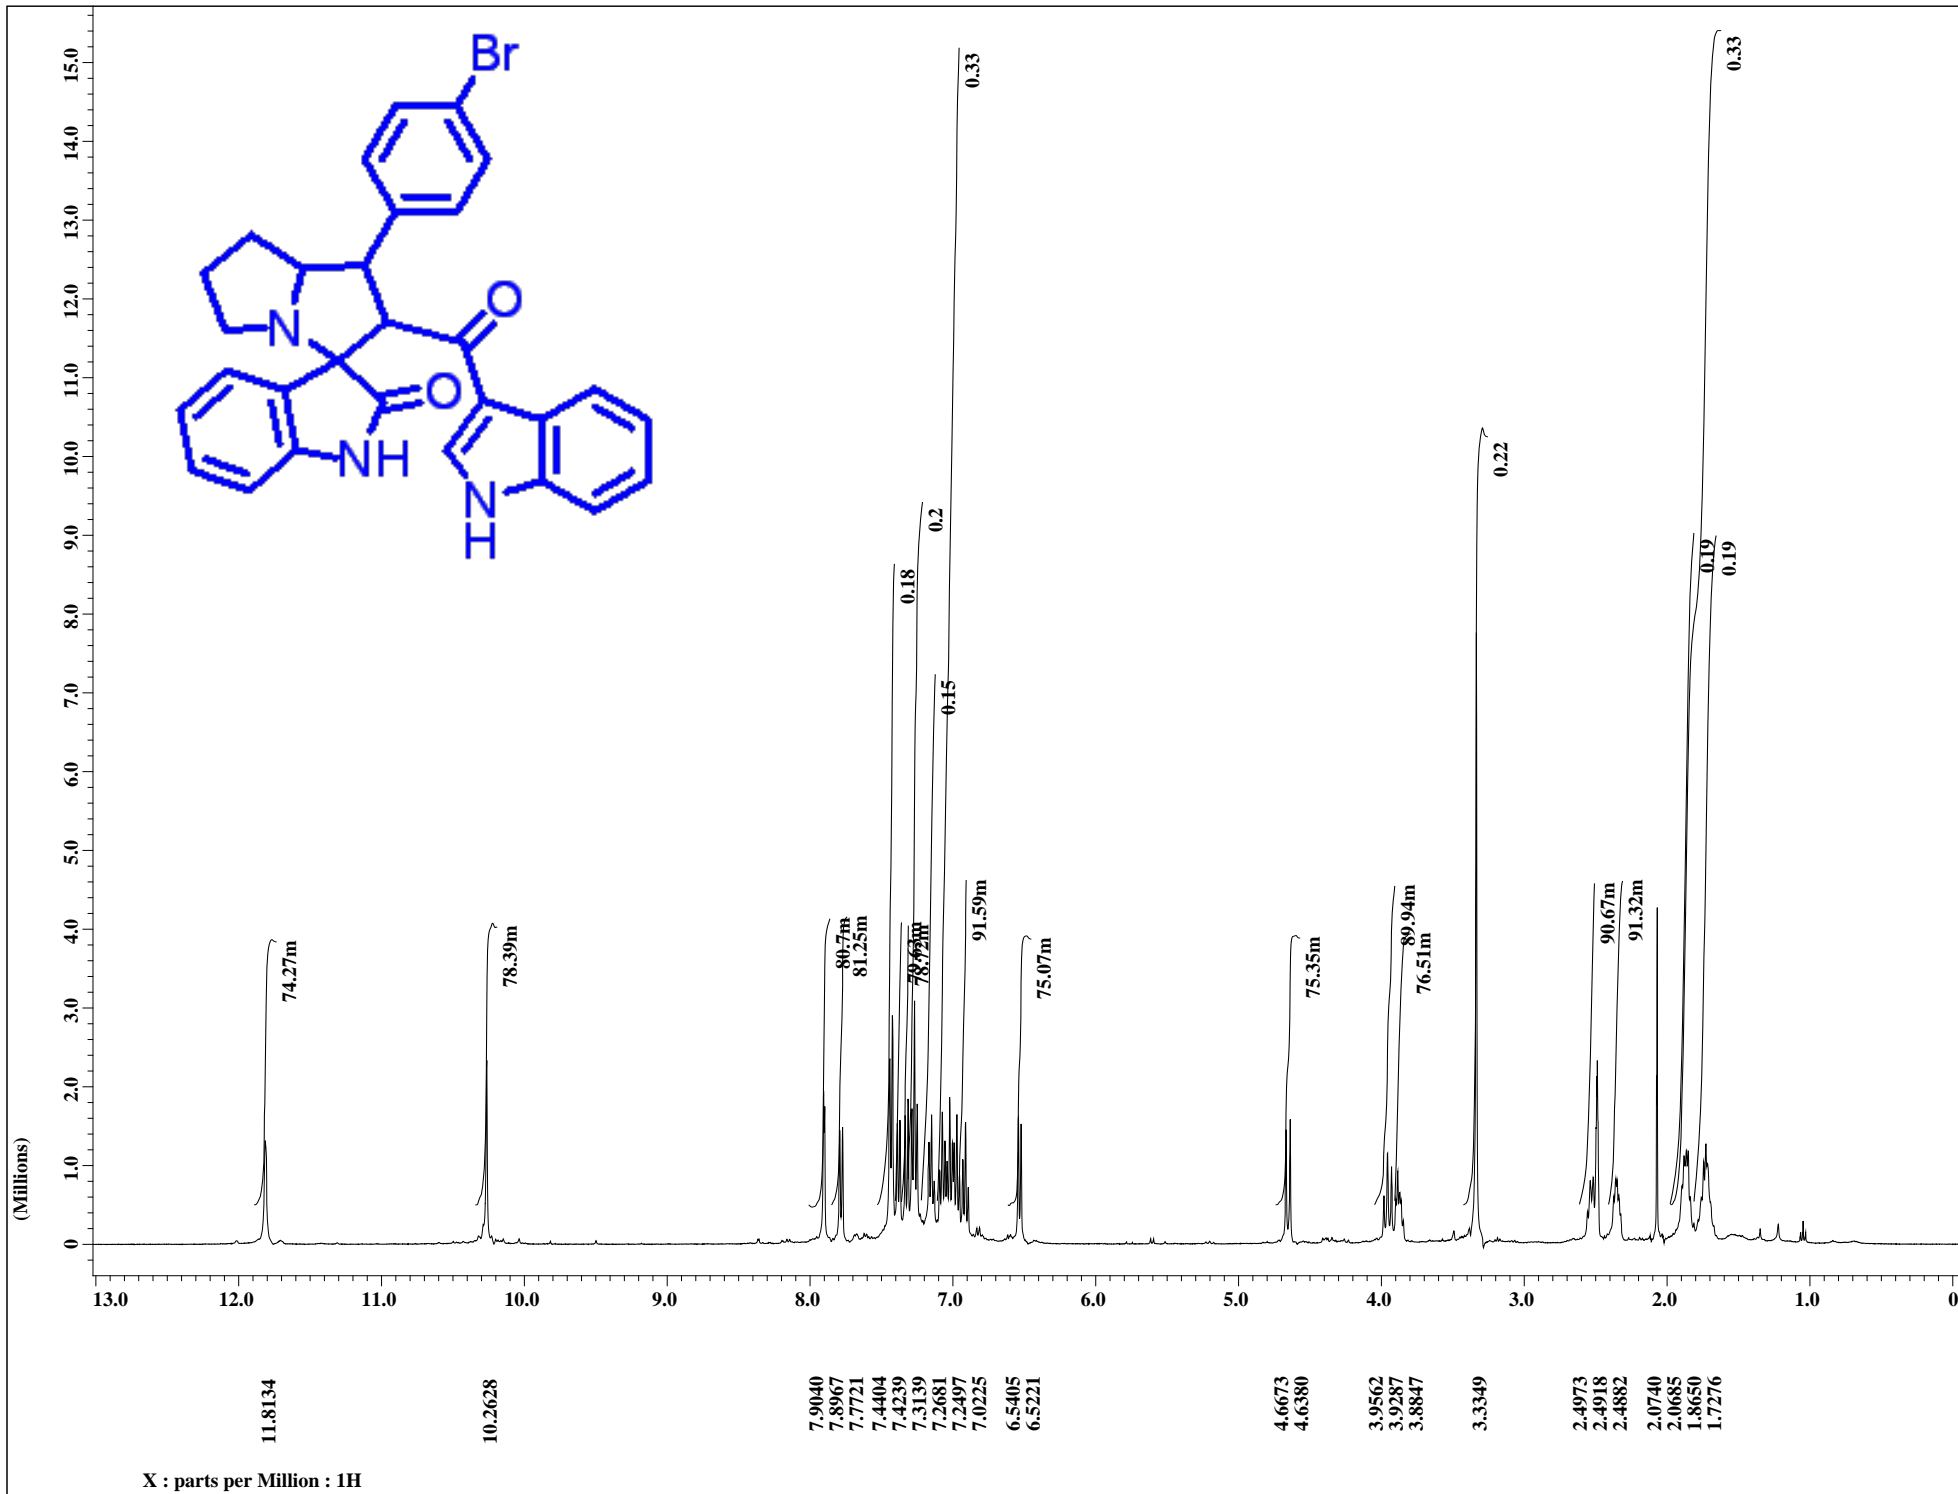

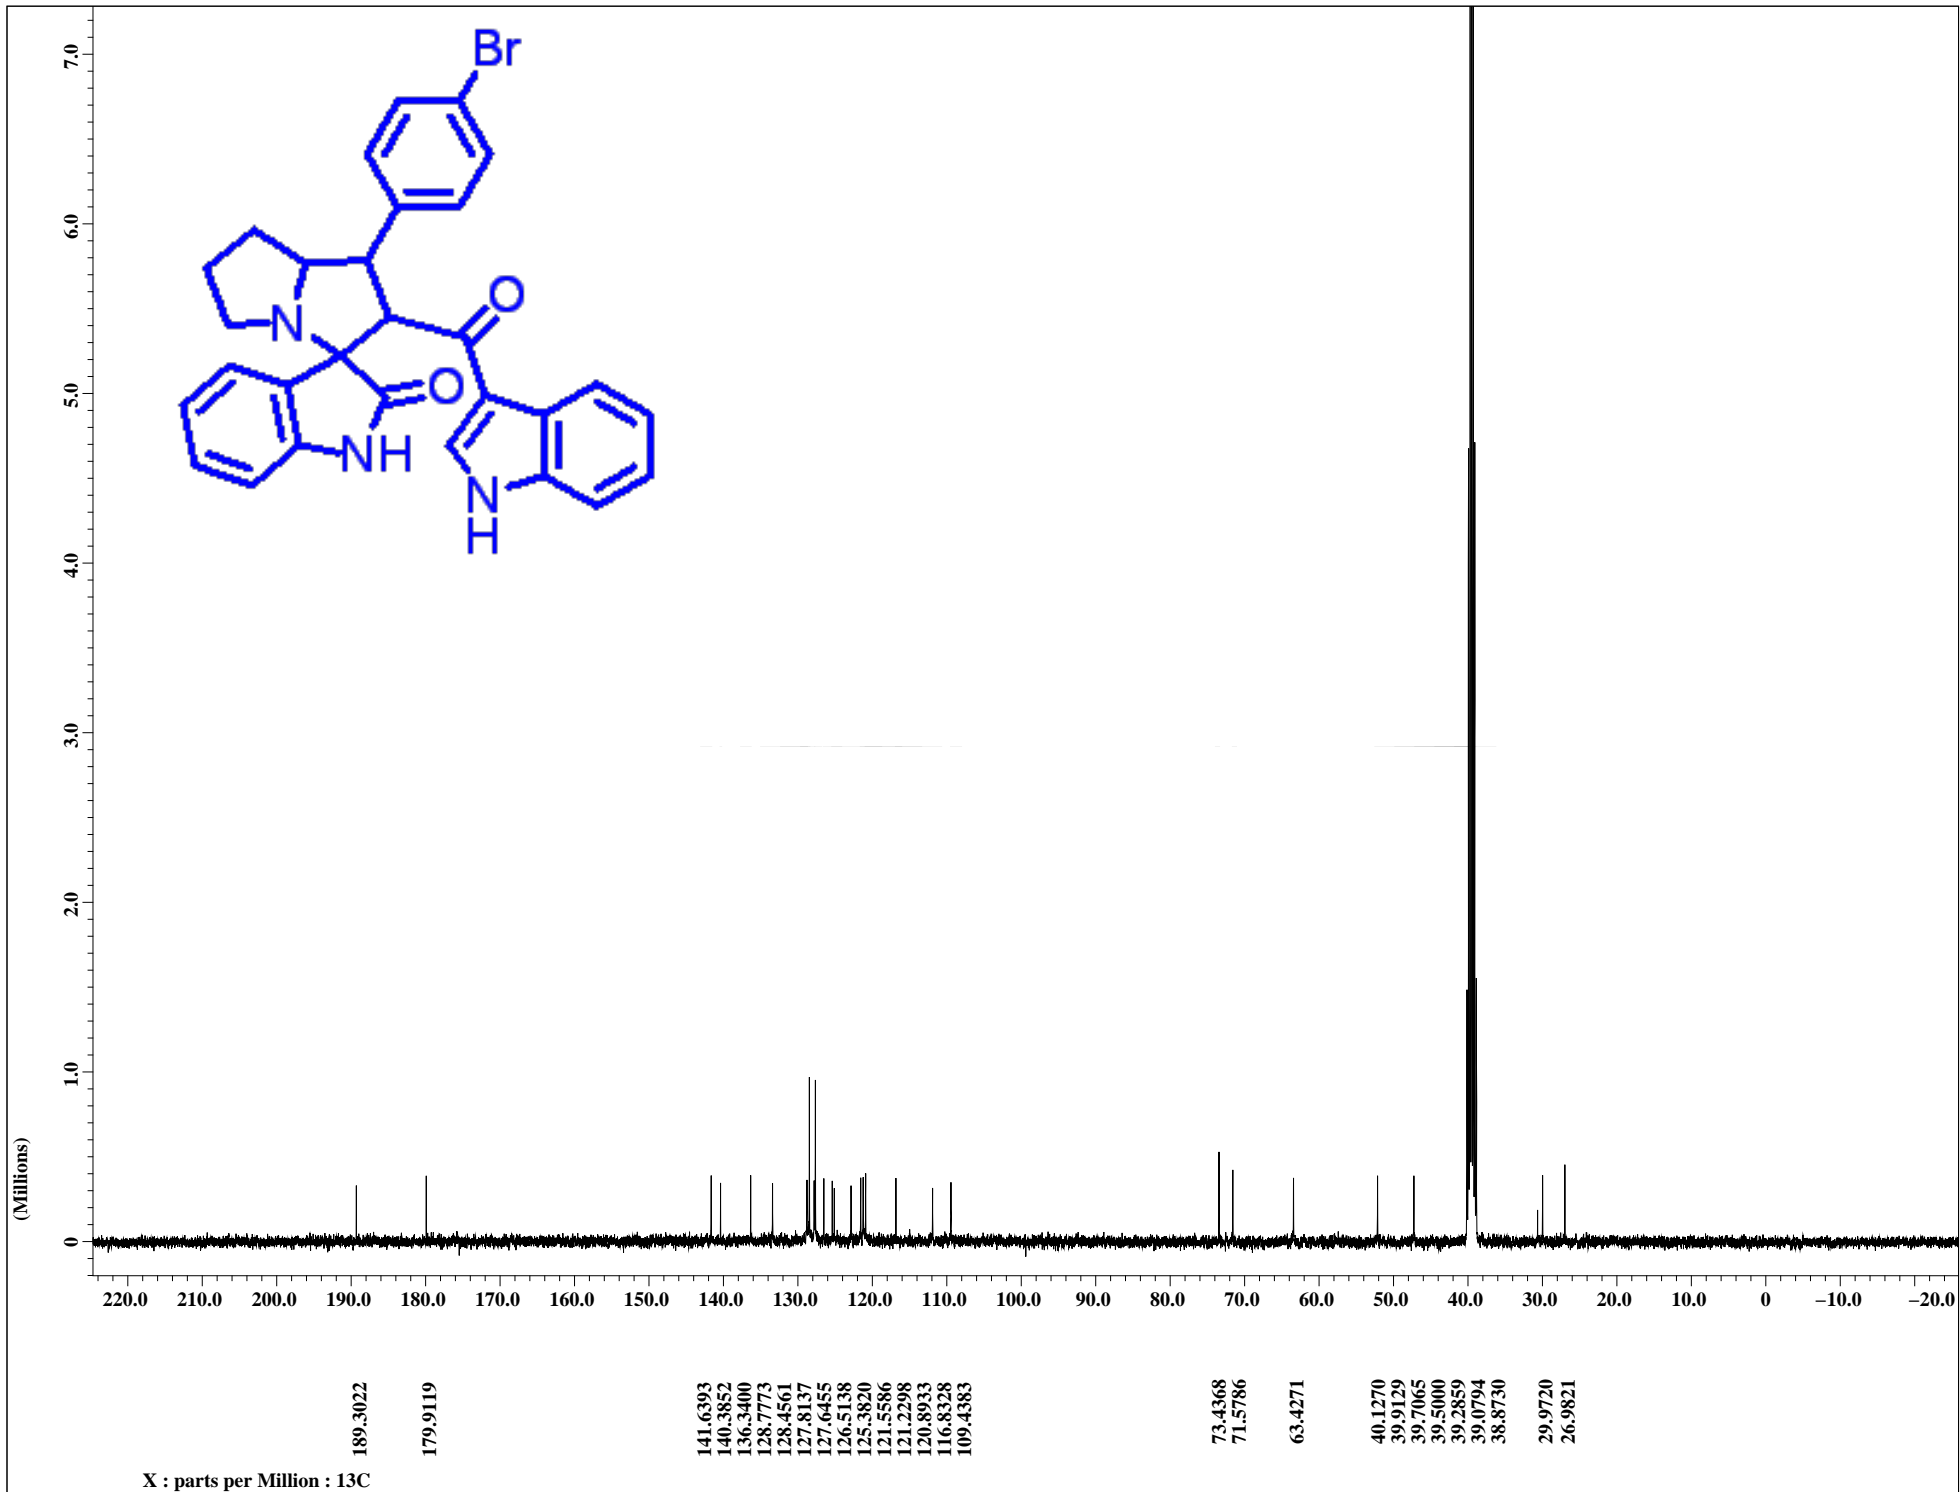

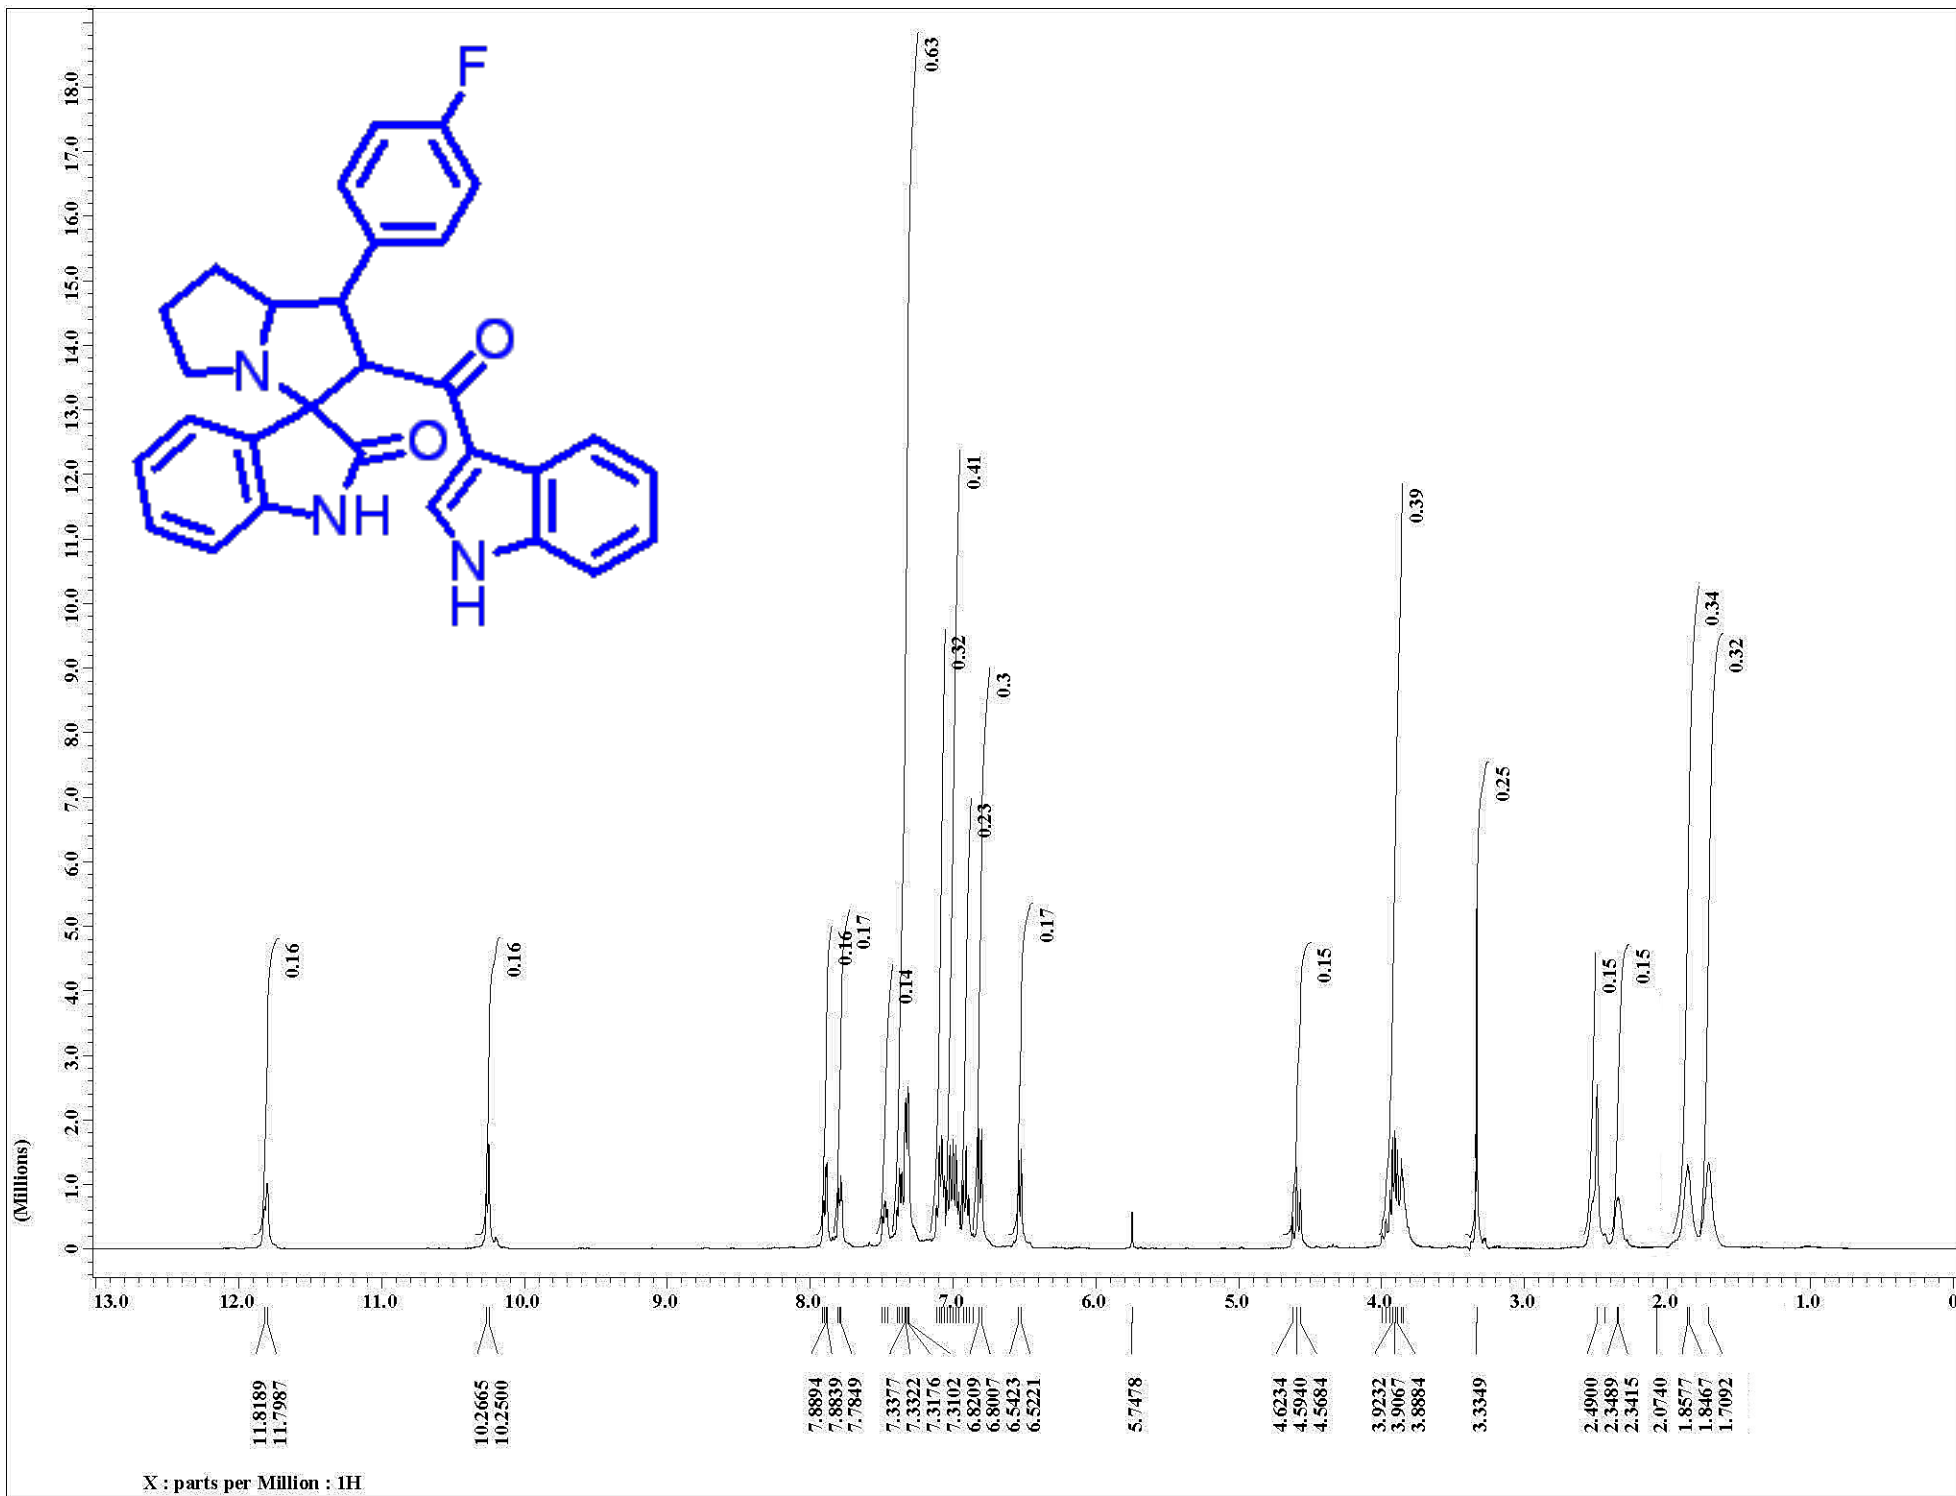

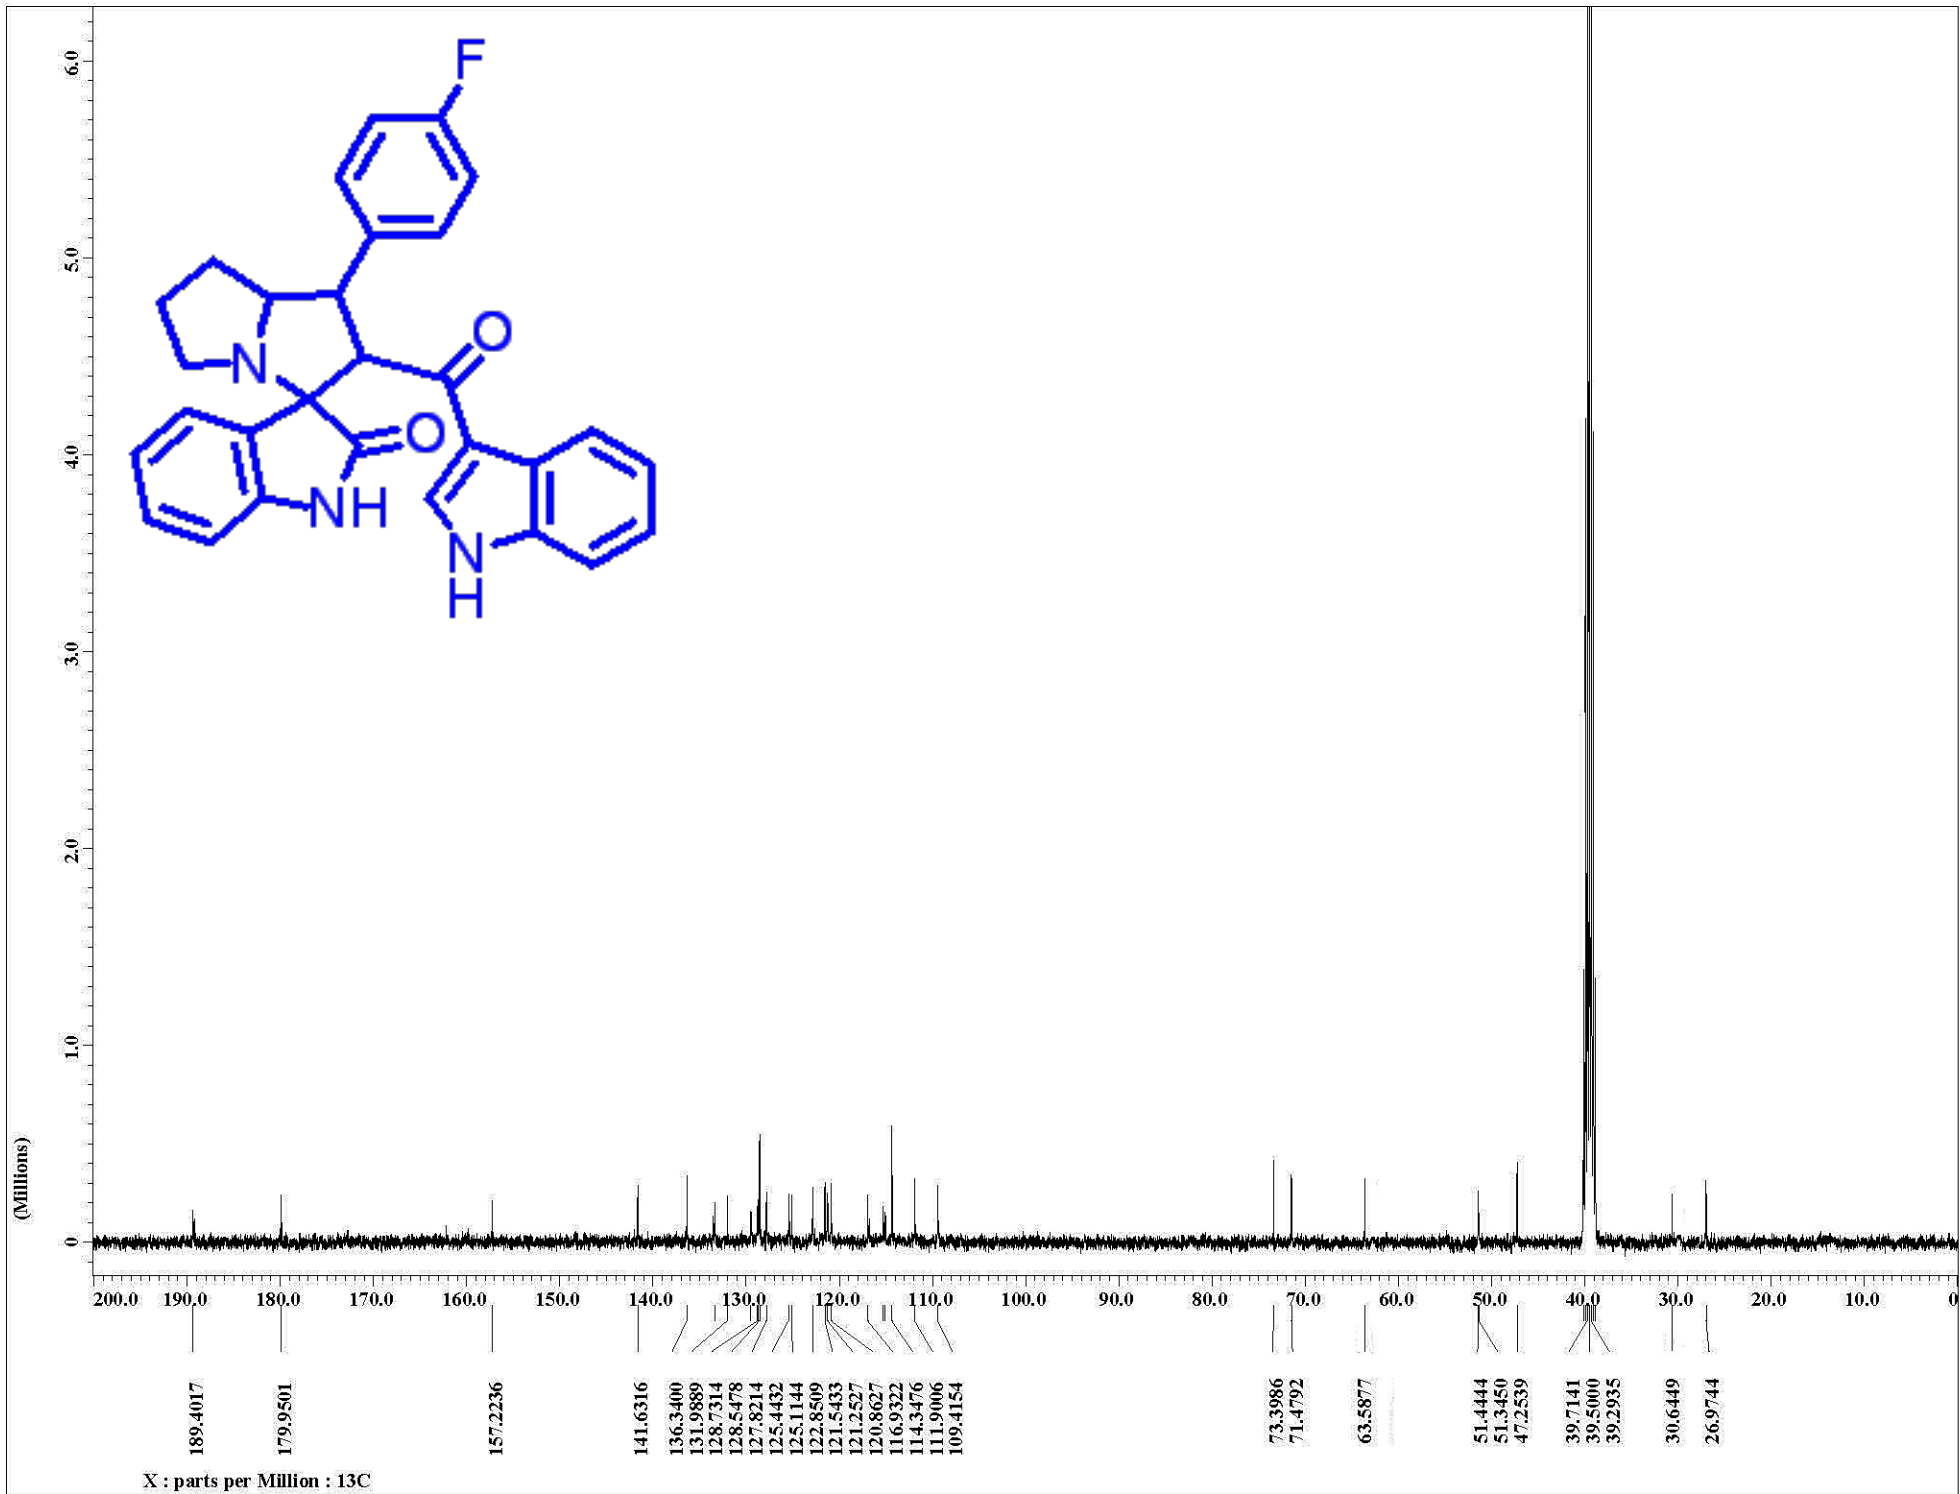

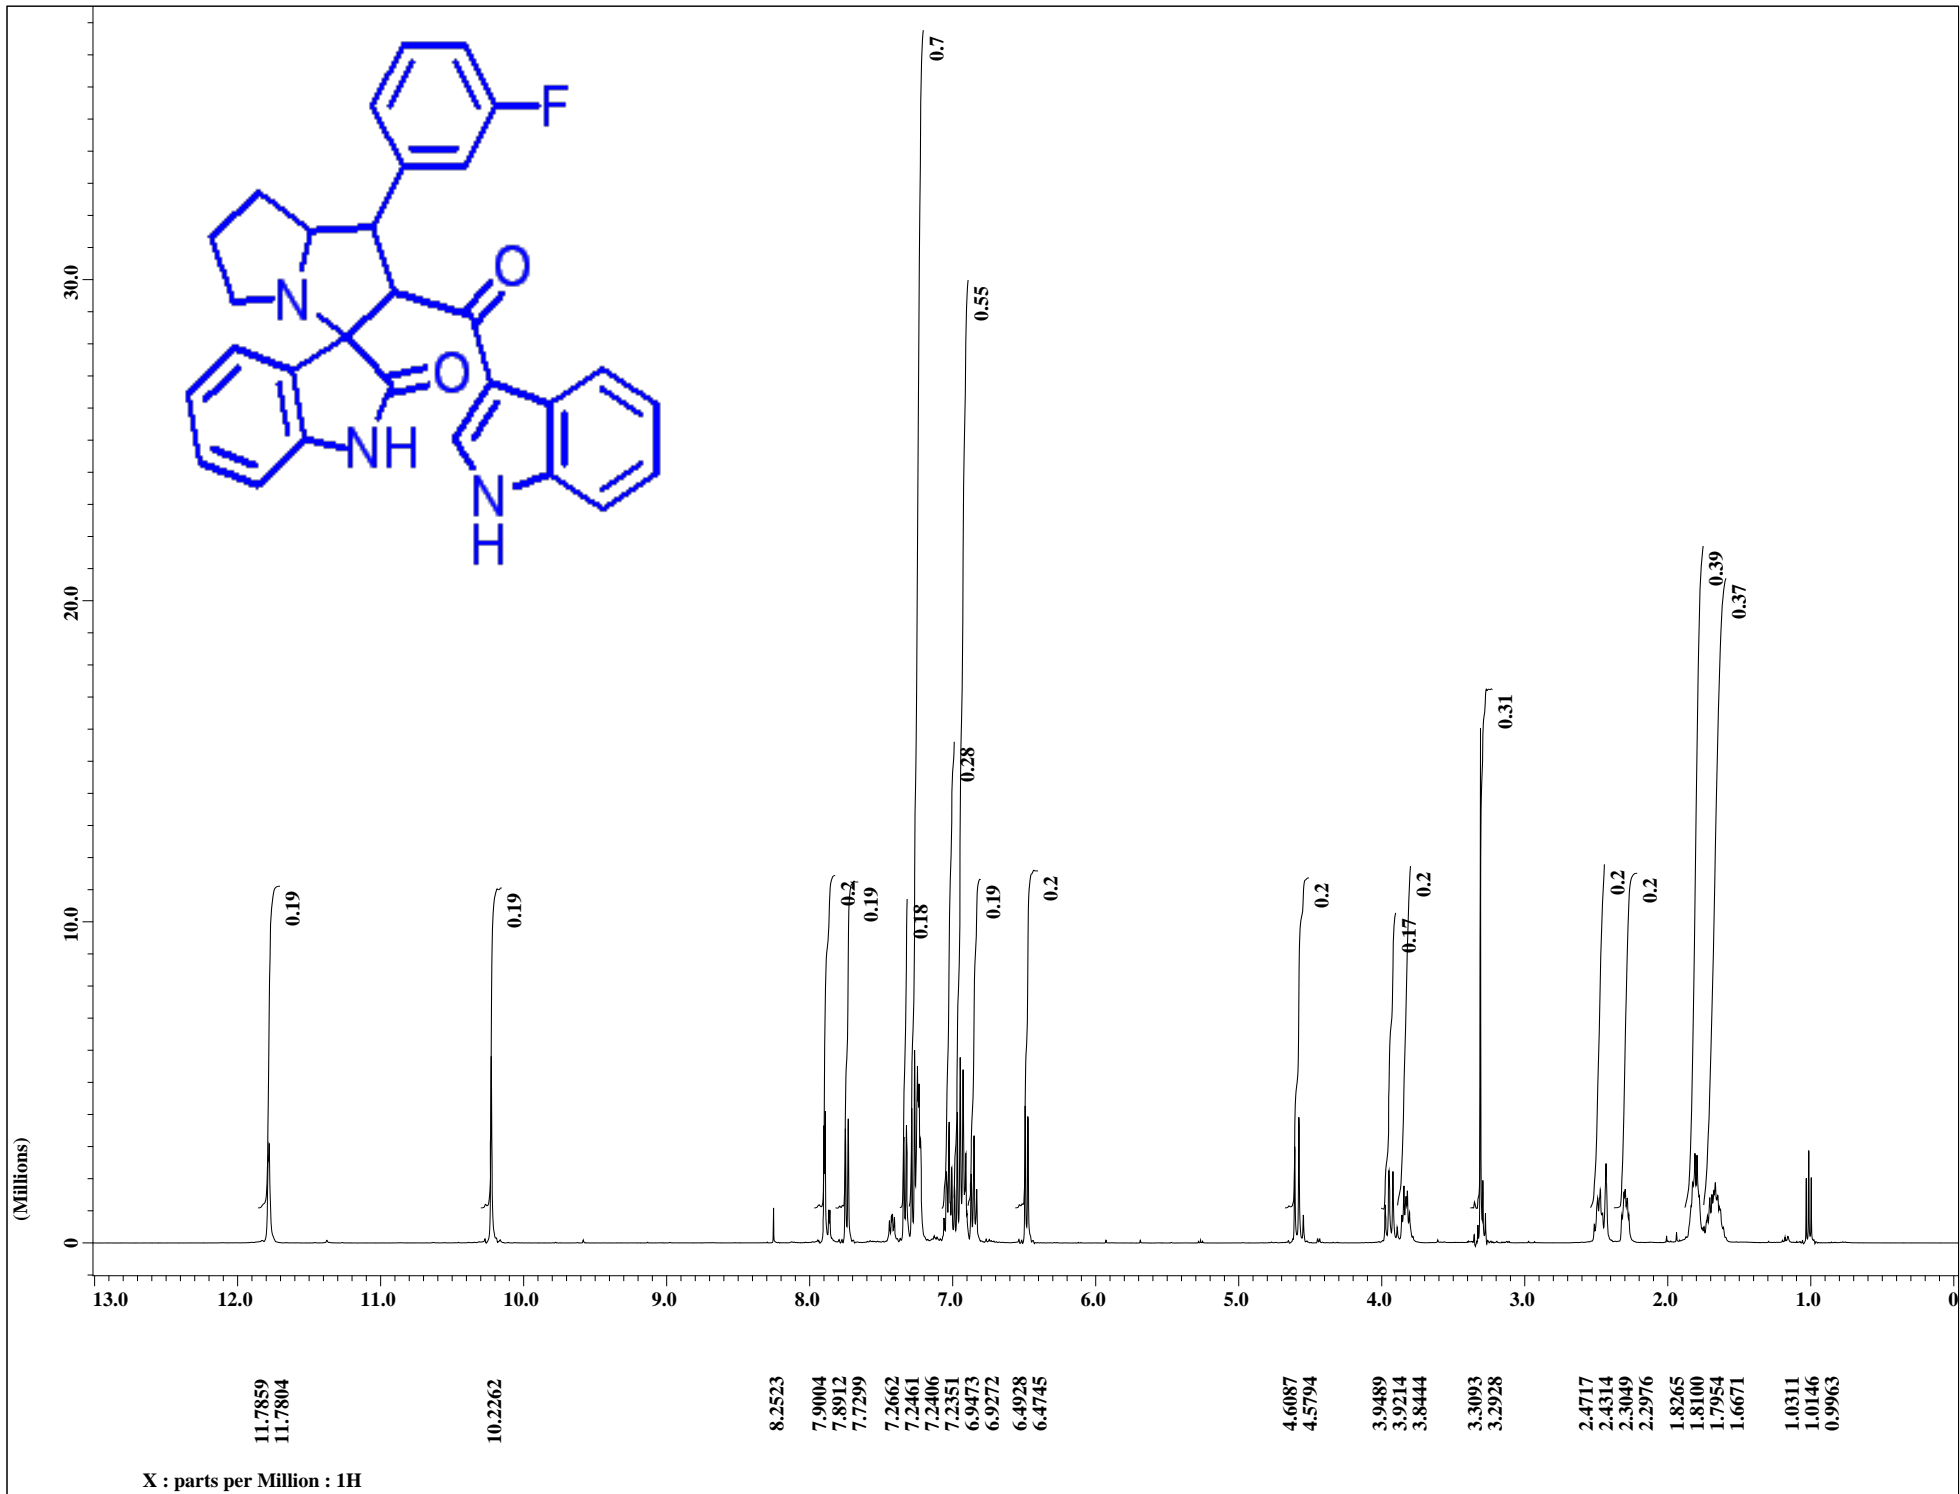

X : parts per Million : 1H

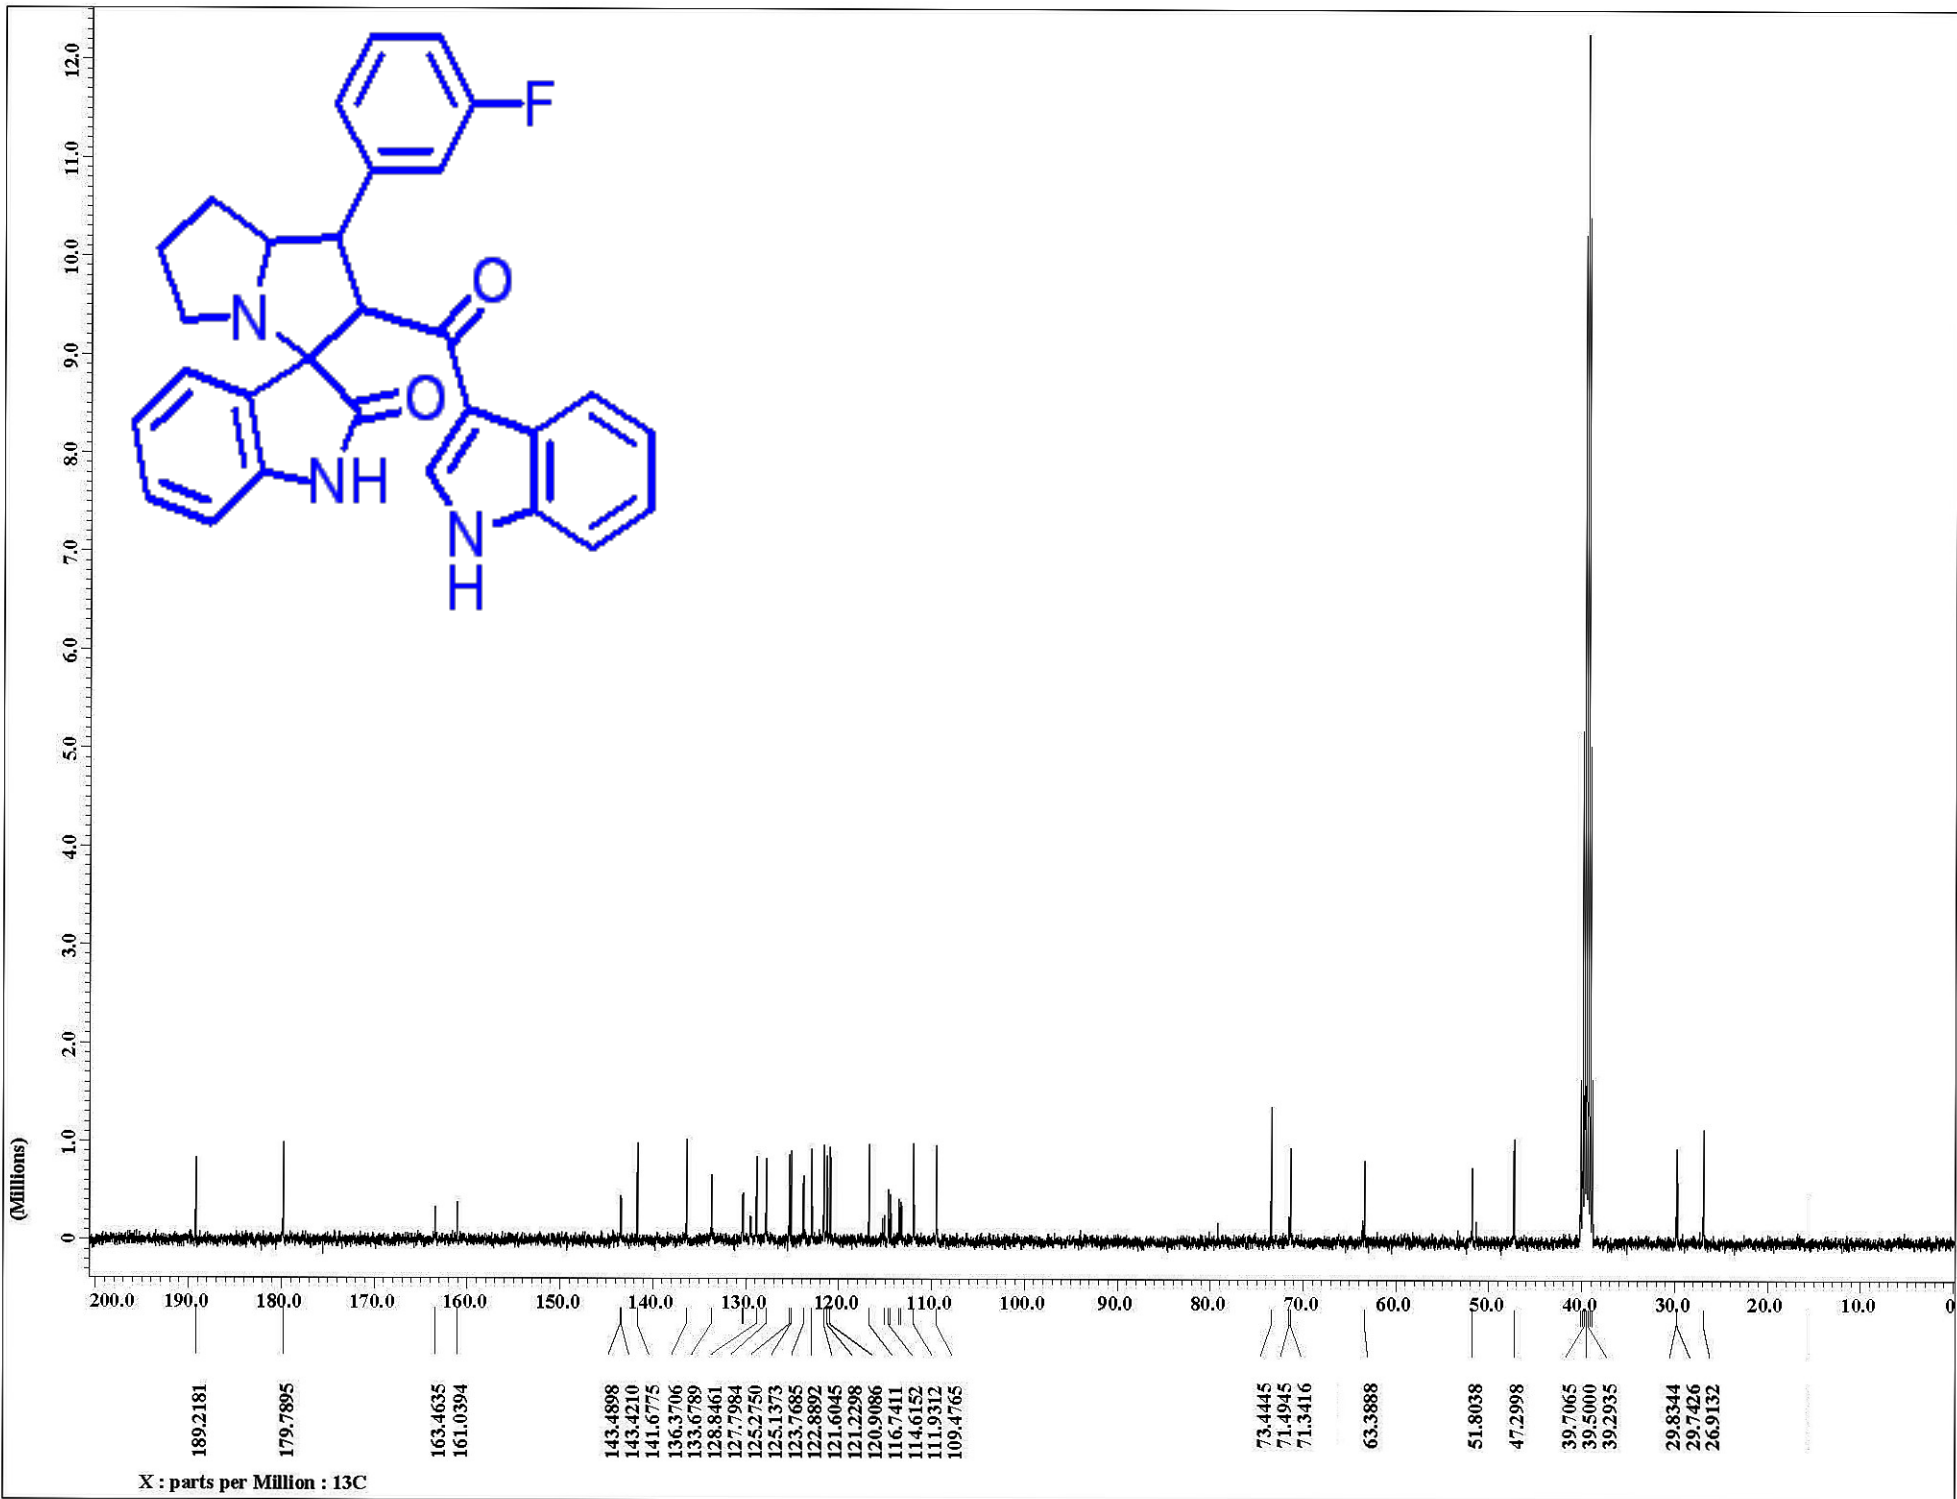

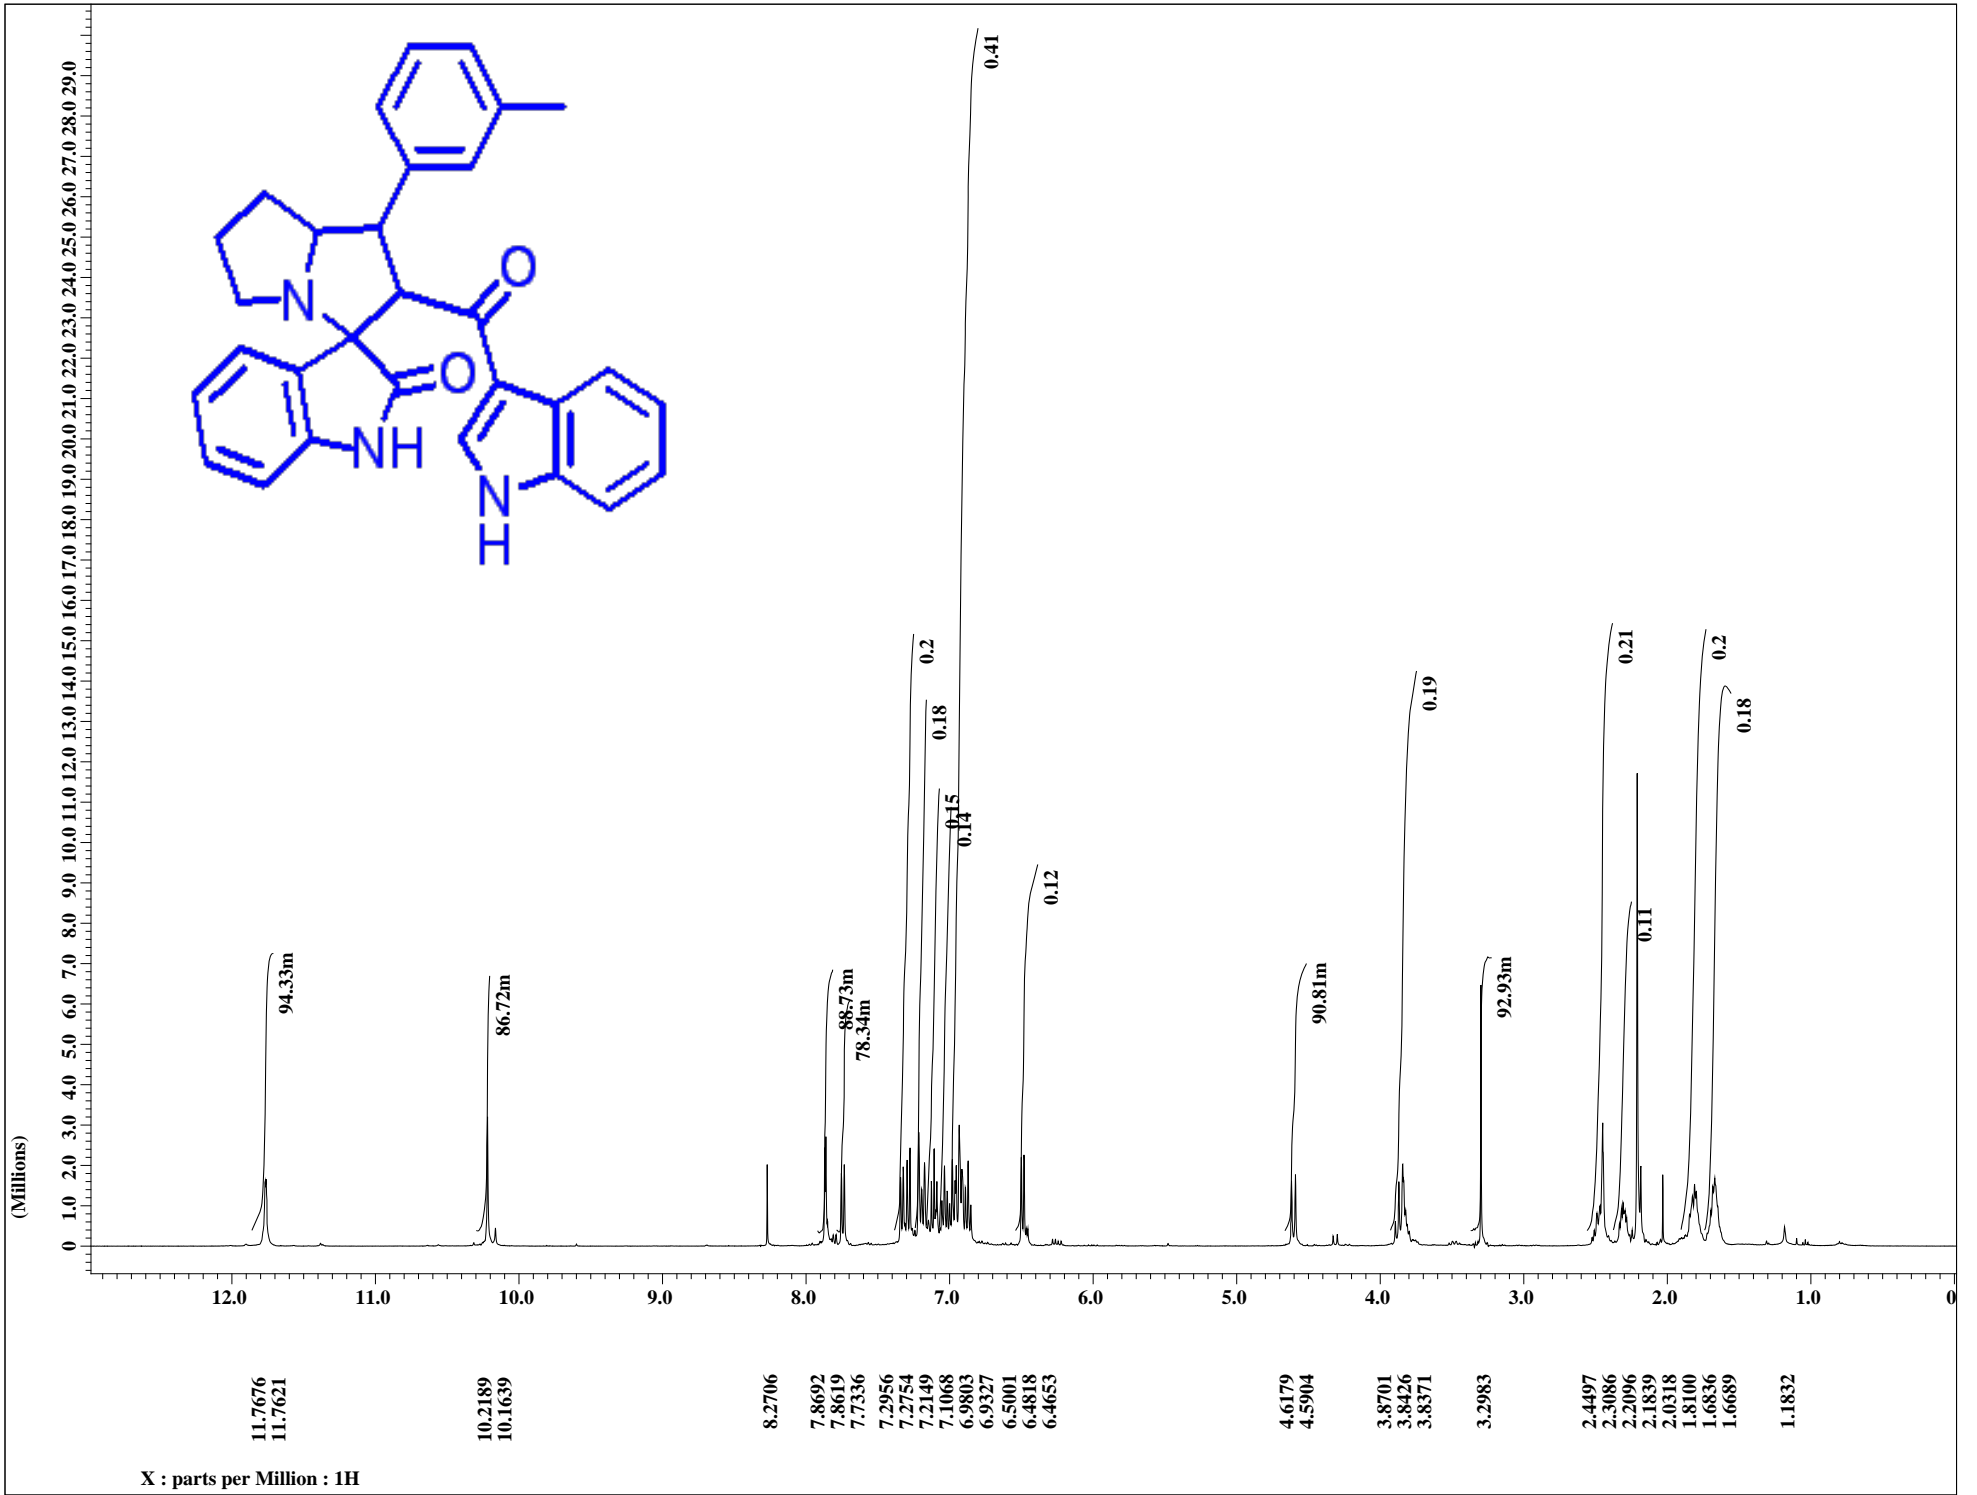

X : parts per Million : 1H

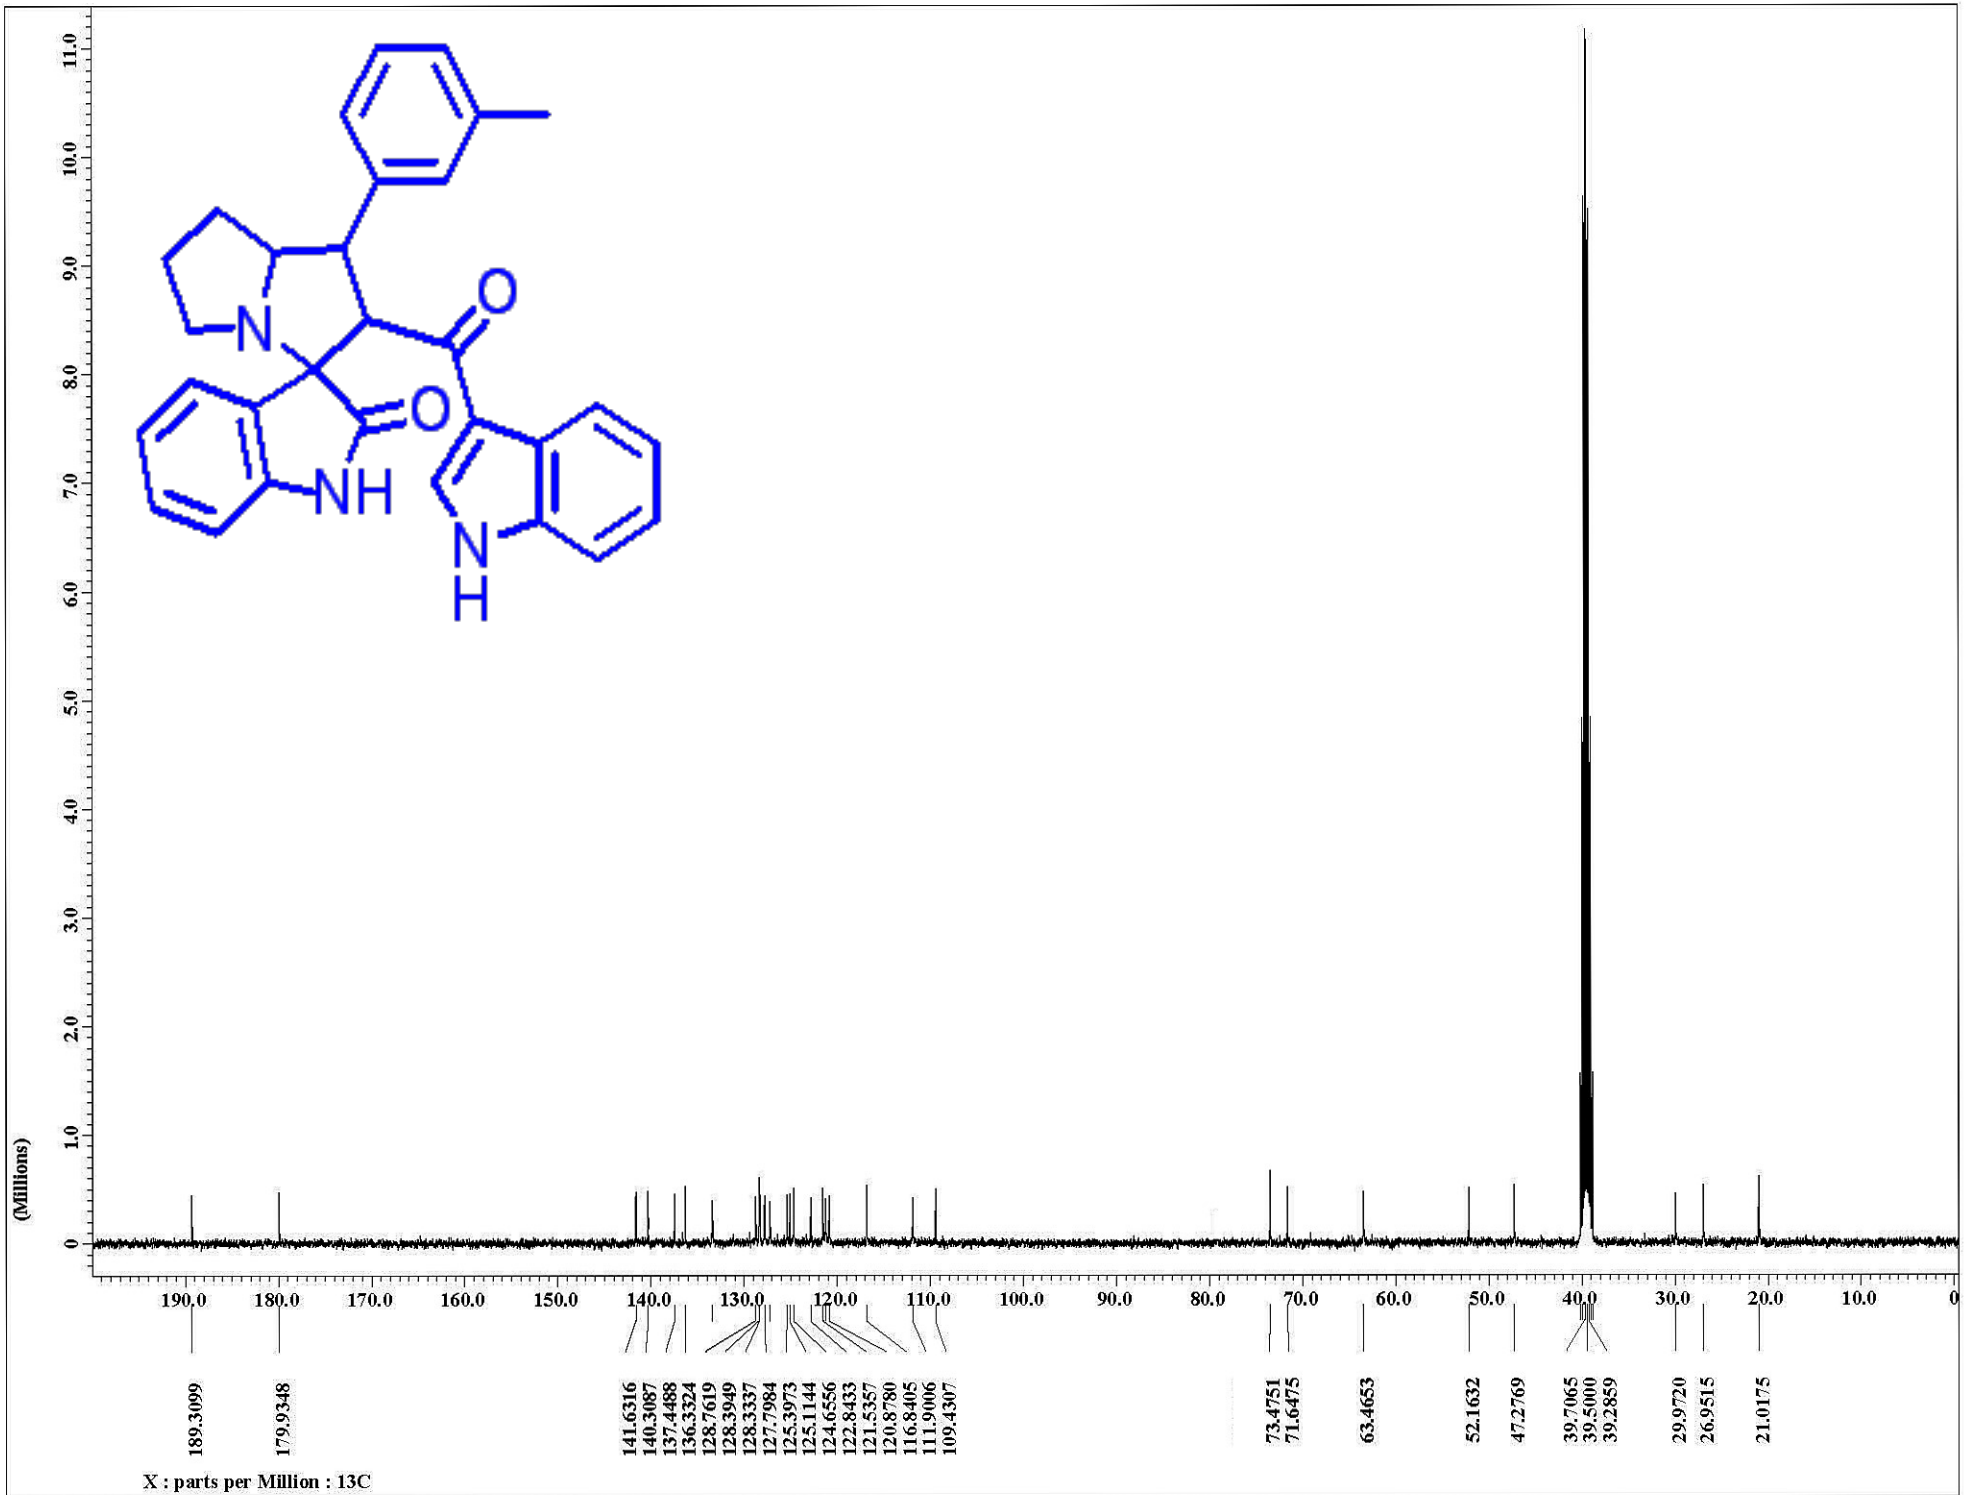

X : parts per Million : 13C



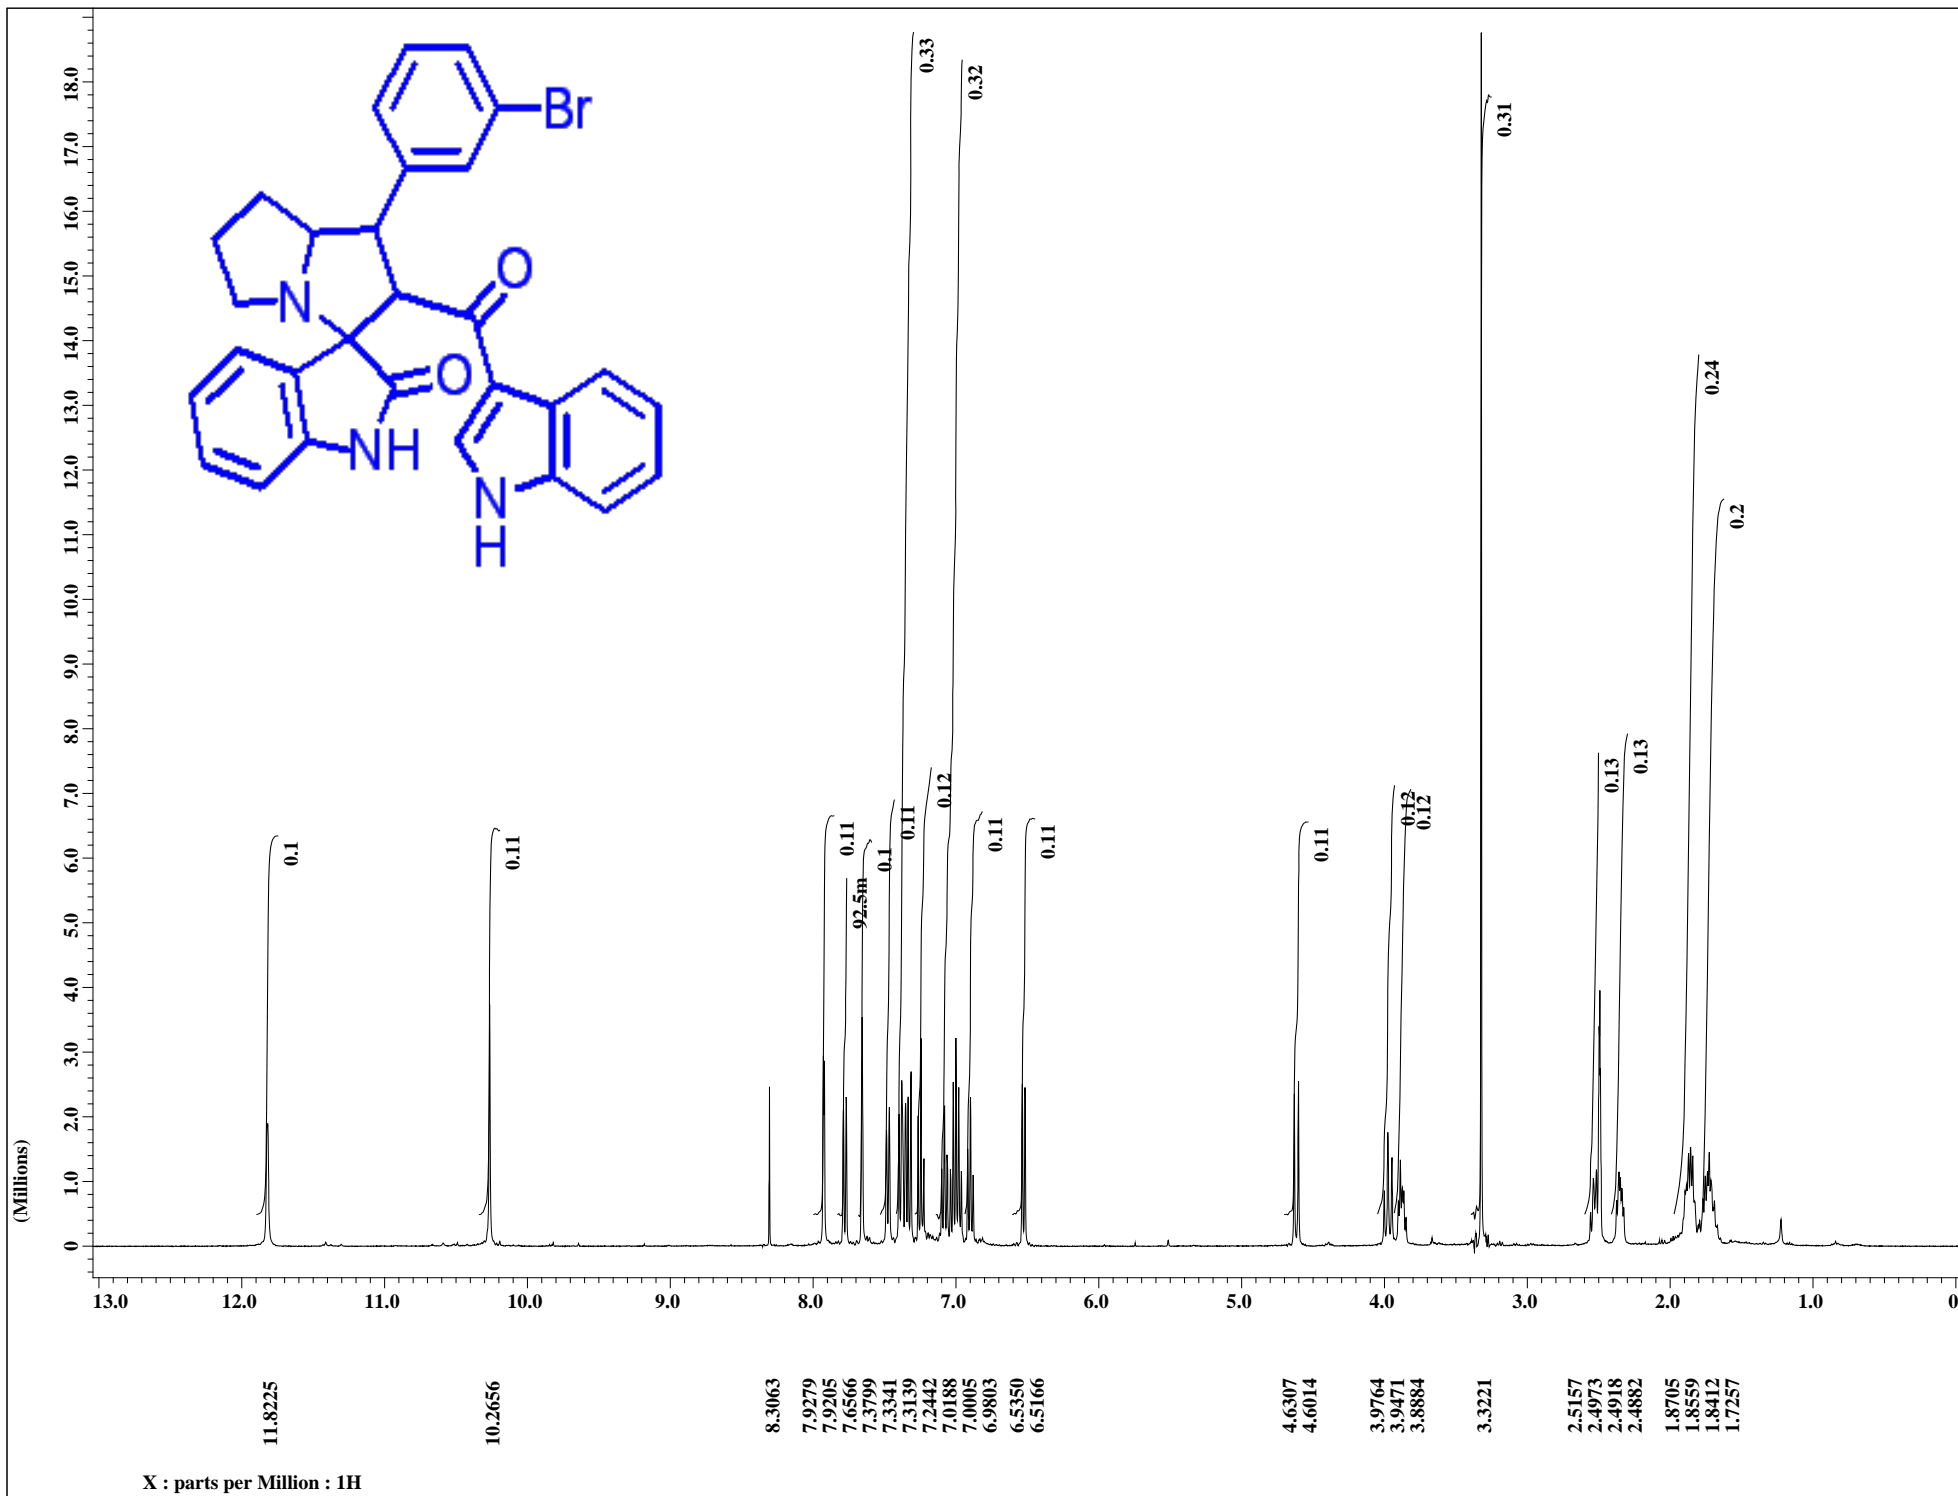

X : parts per Million : 1H

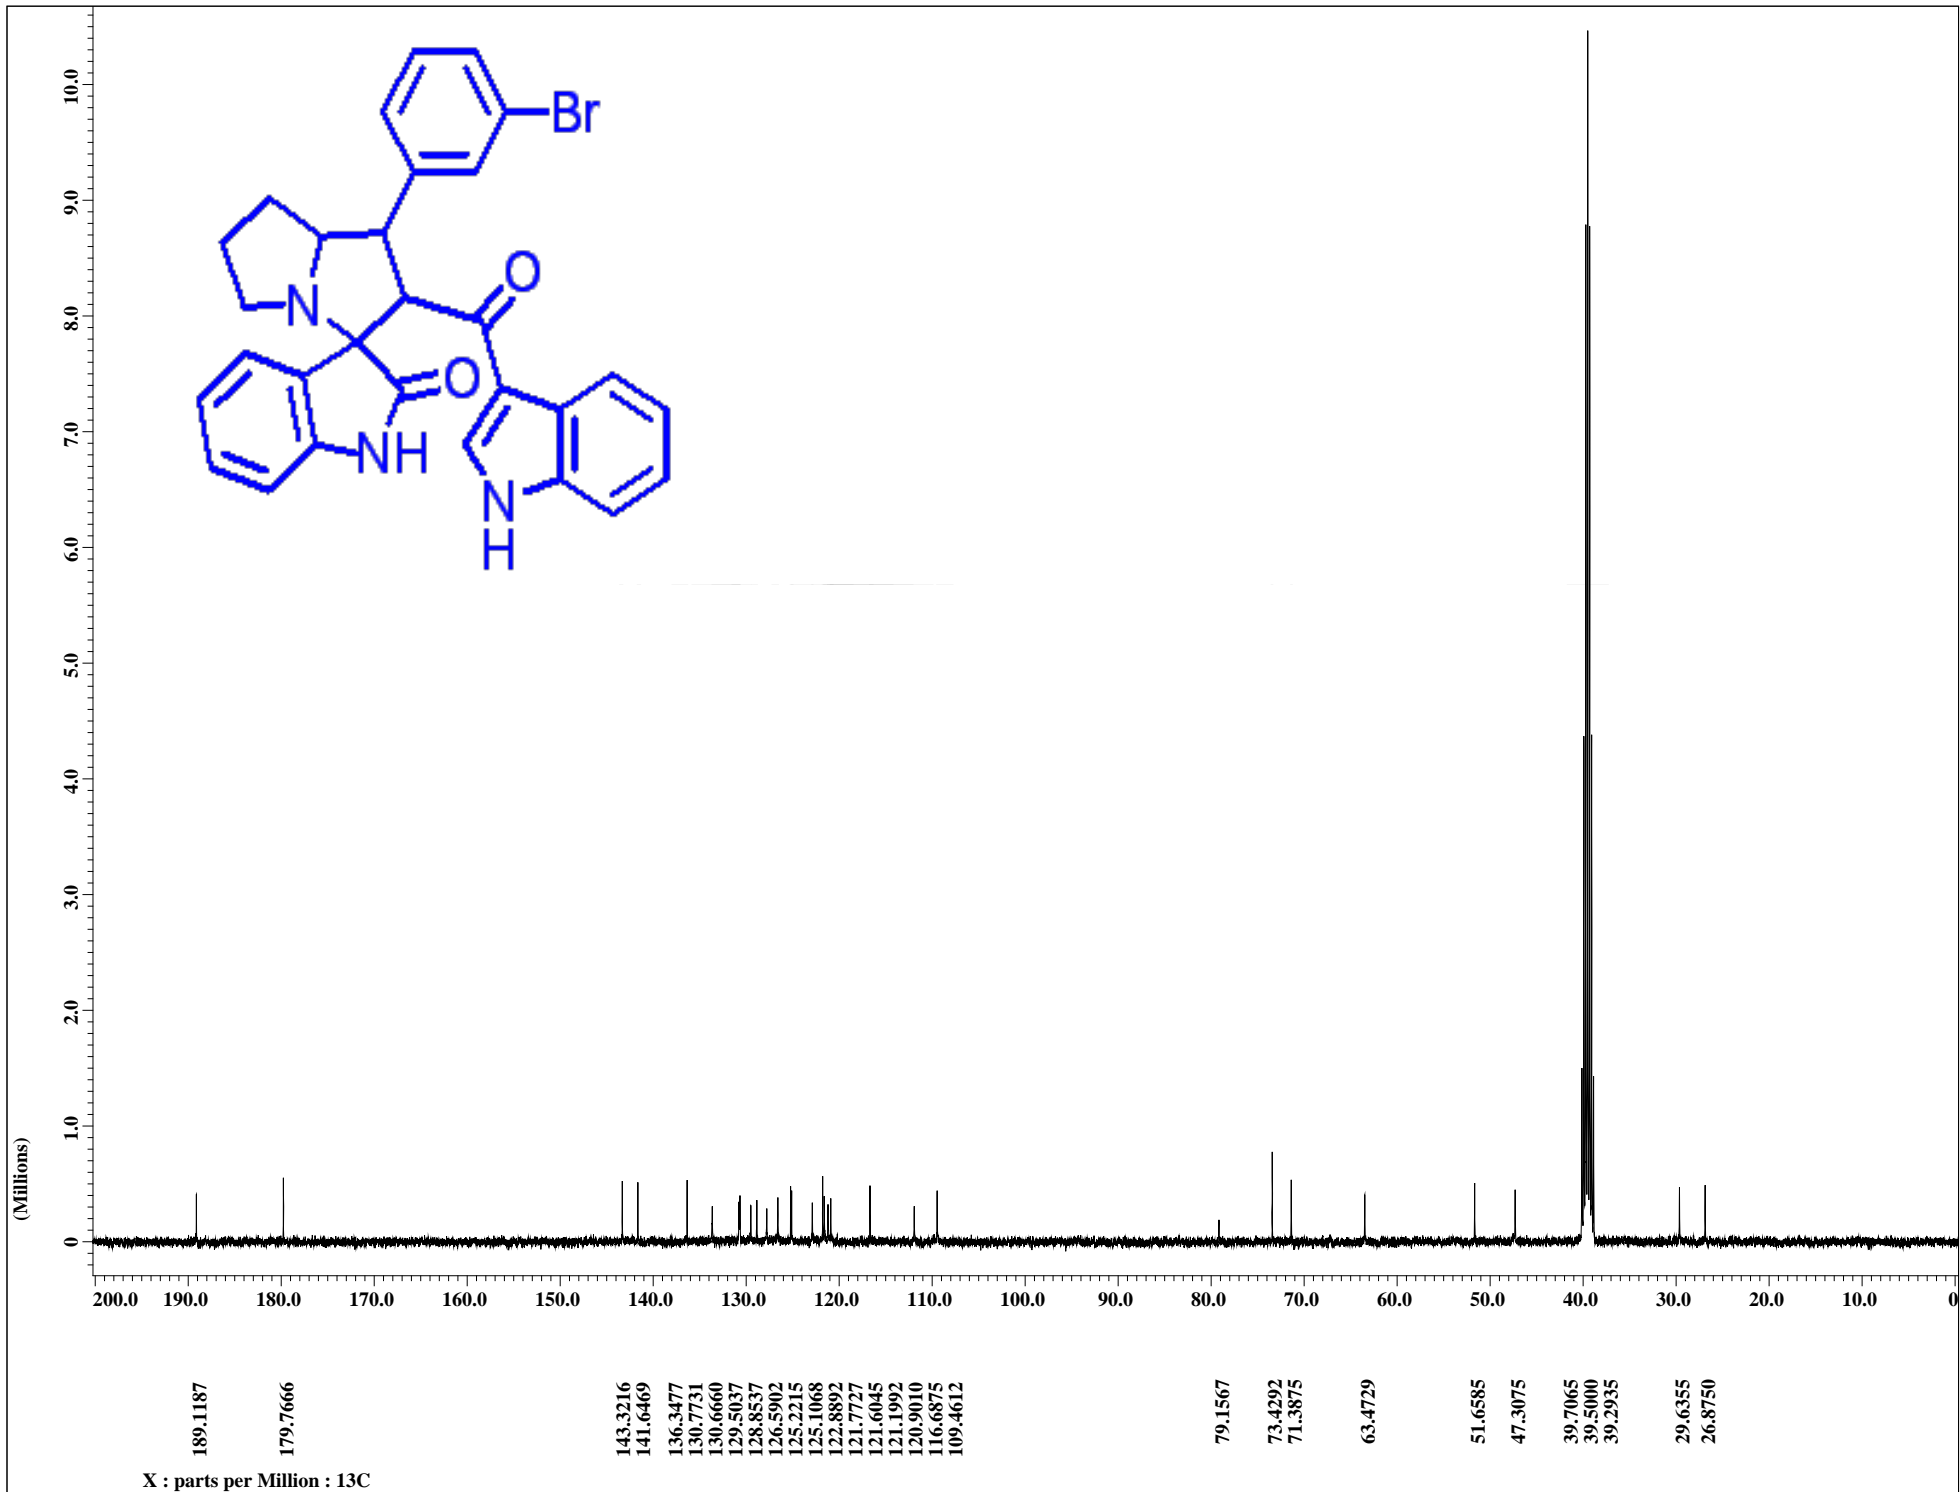

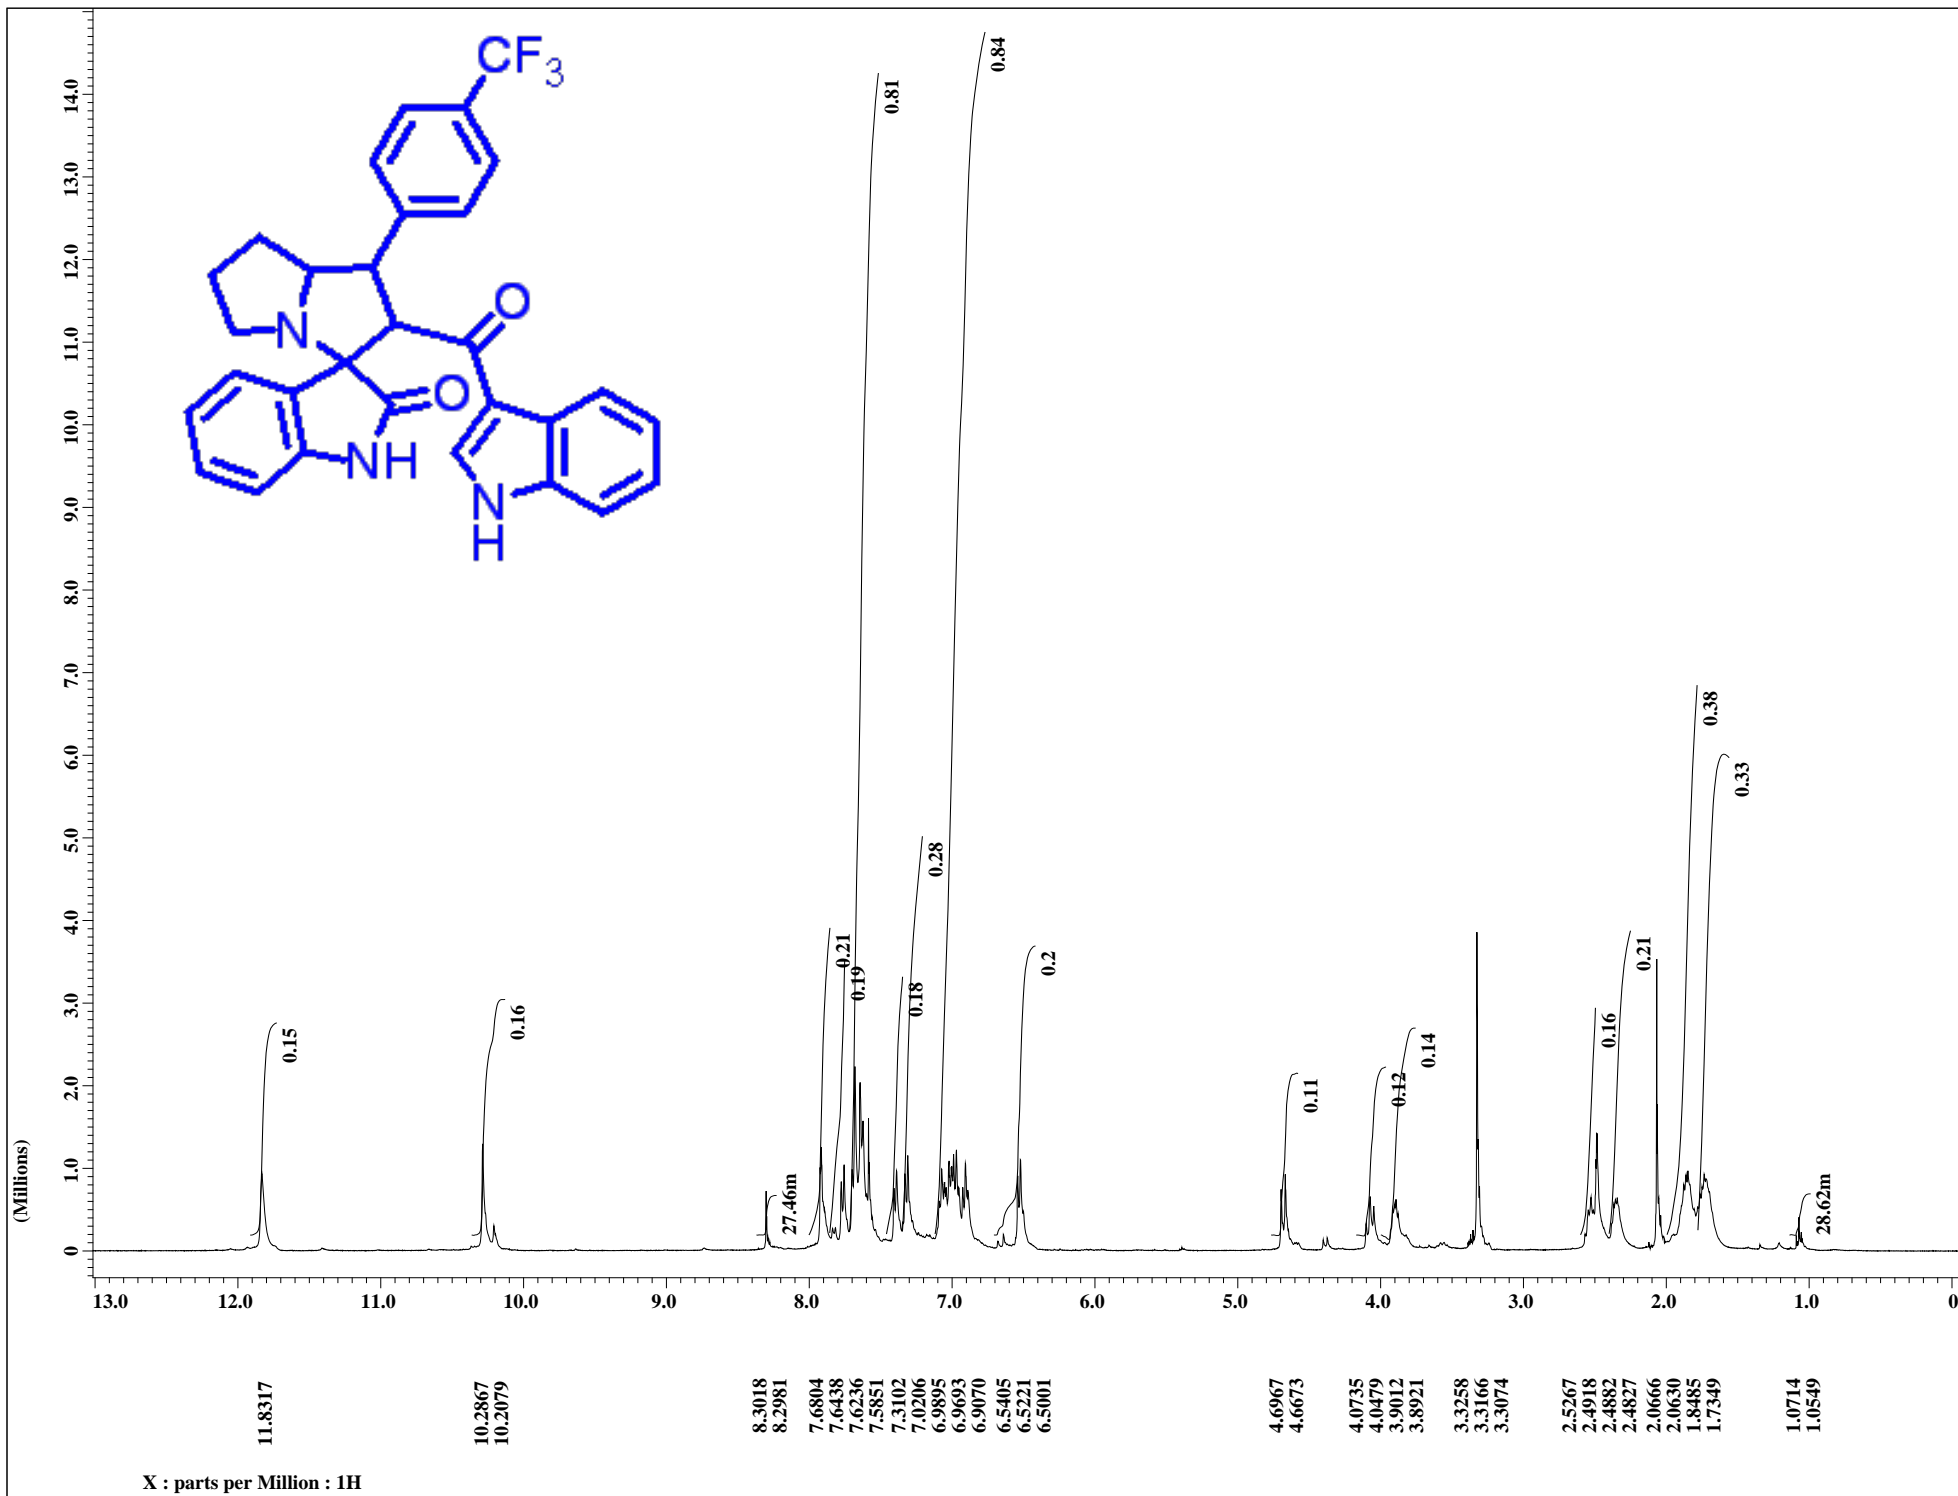

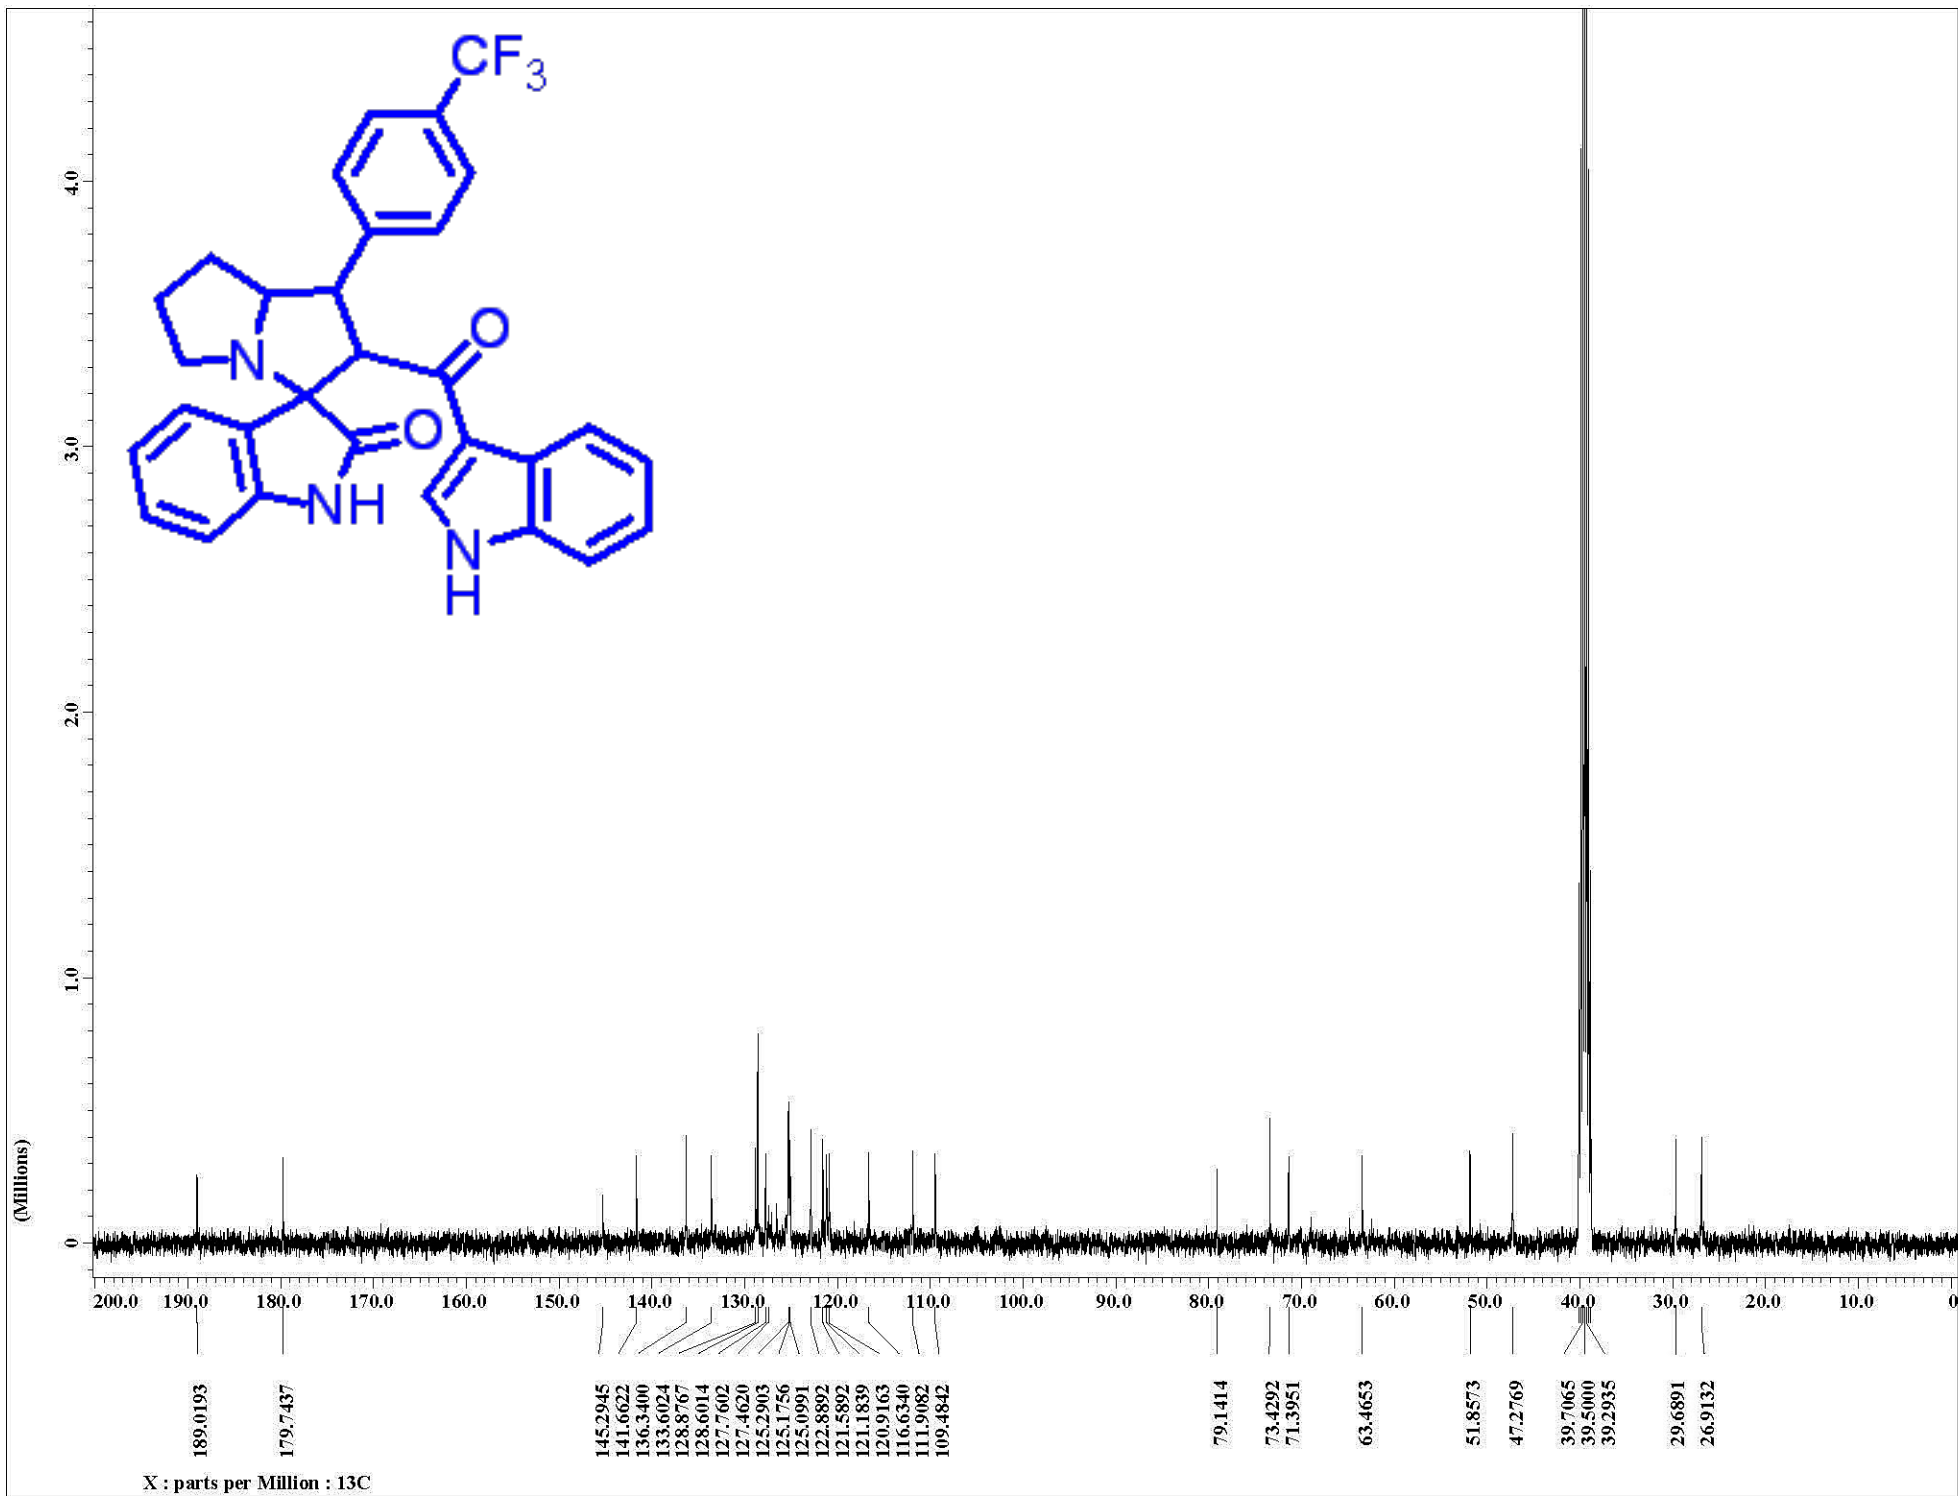

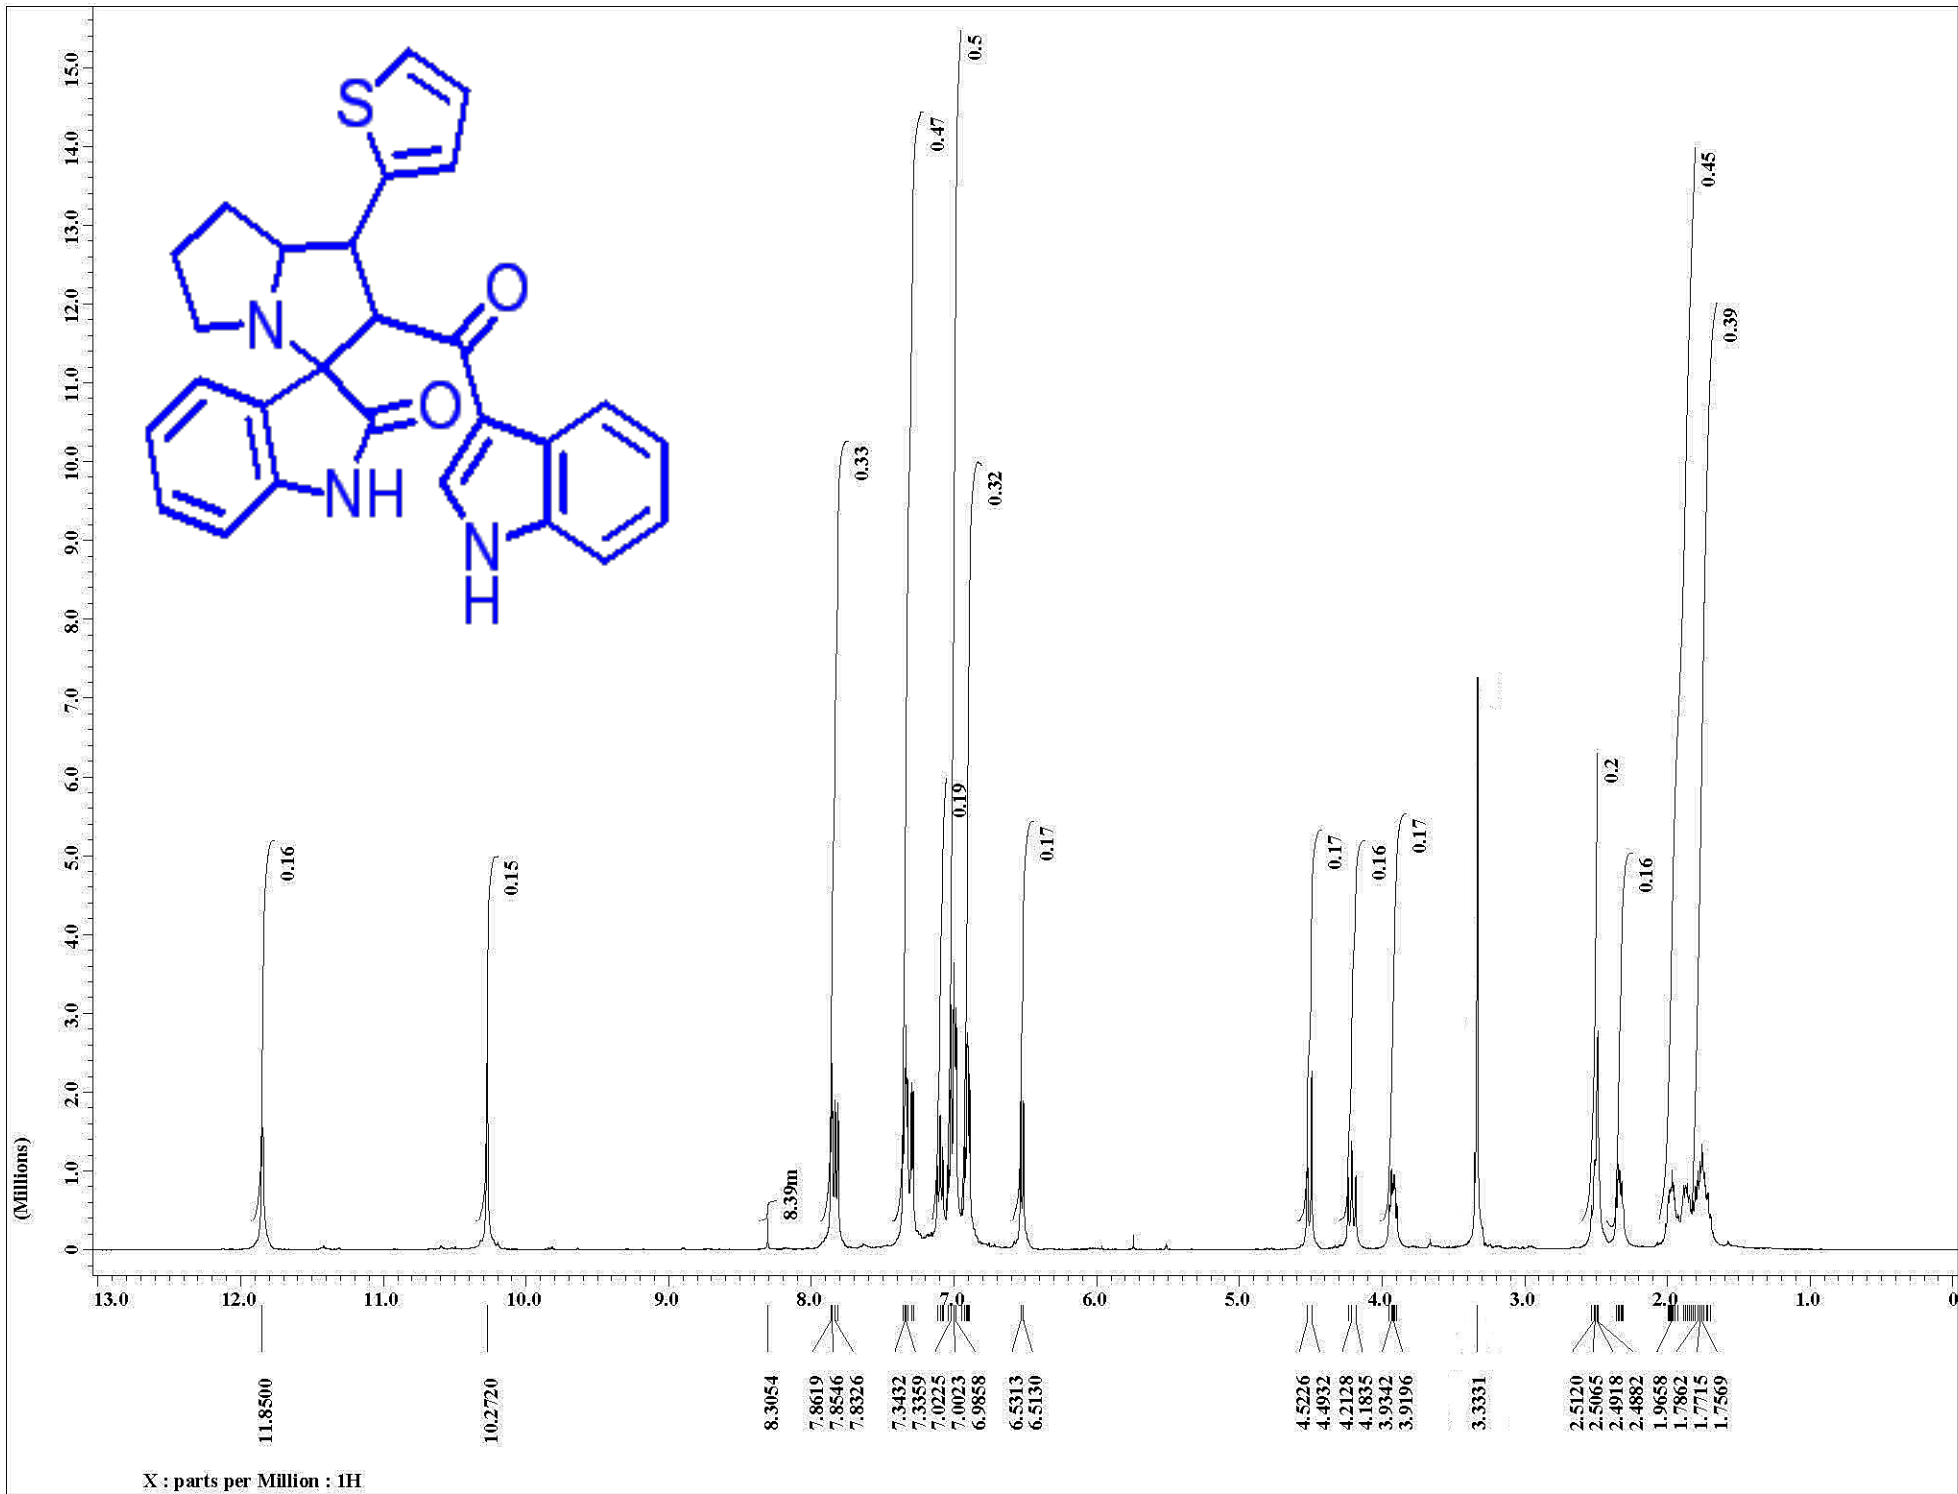

X : parts per Million : 1H

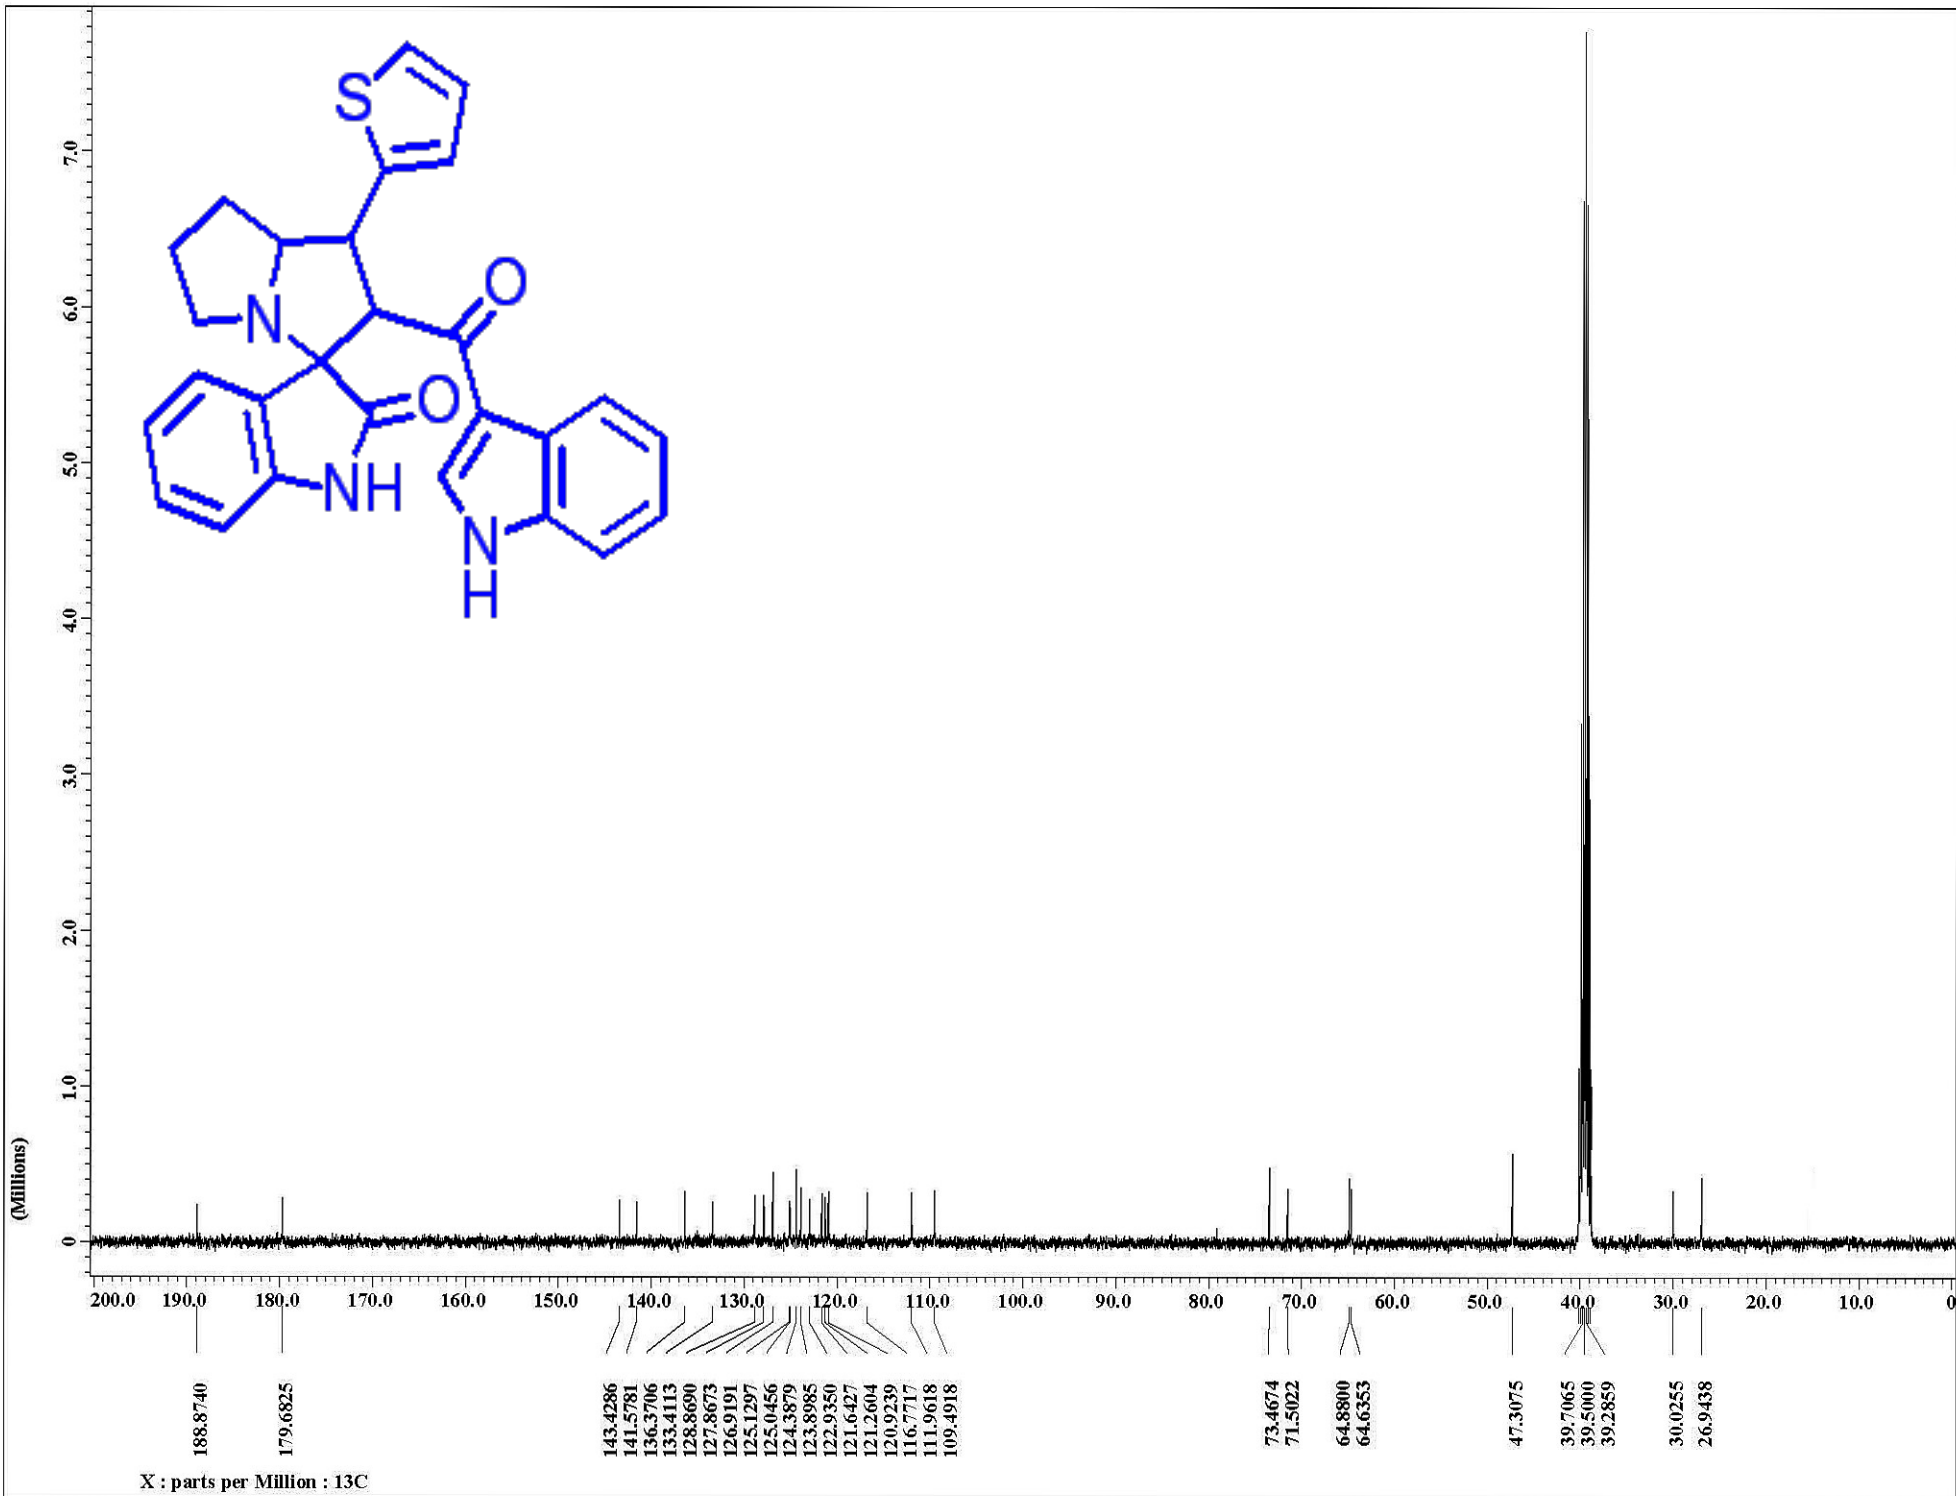

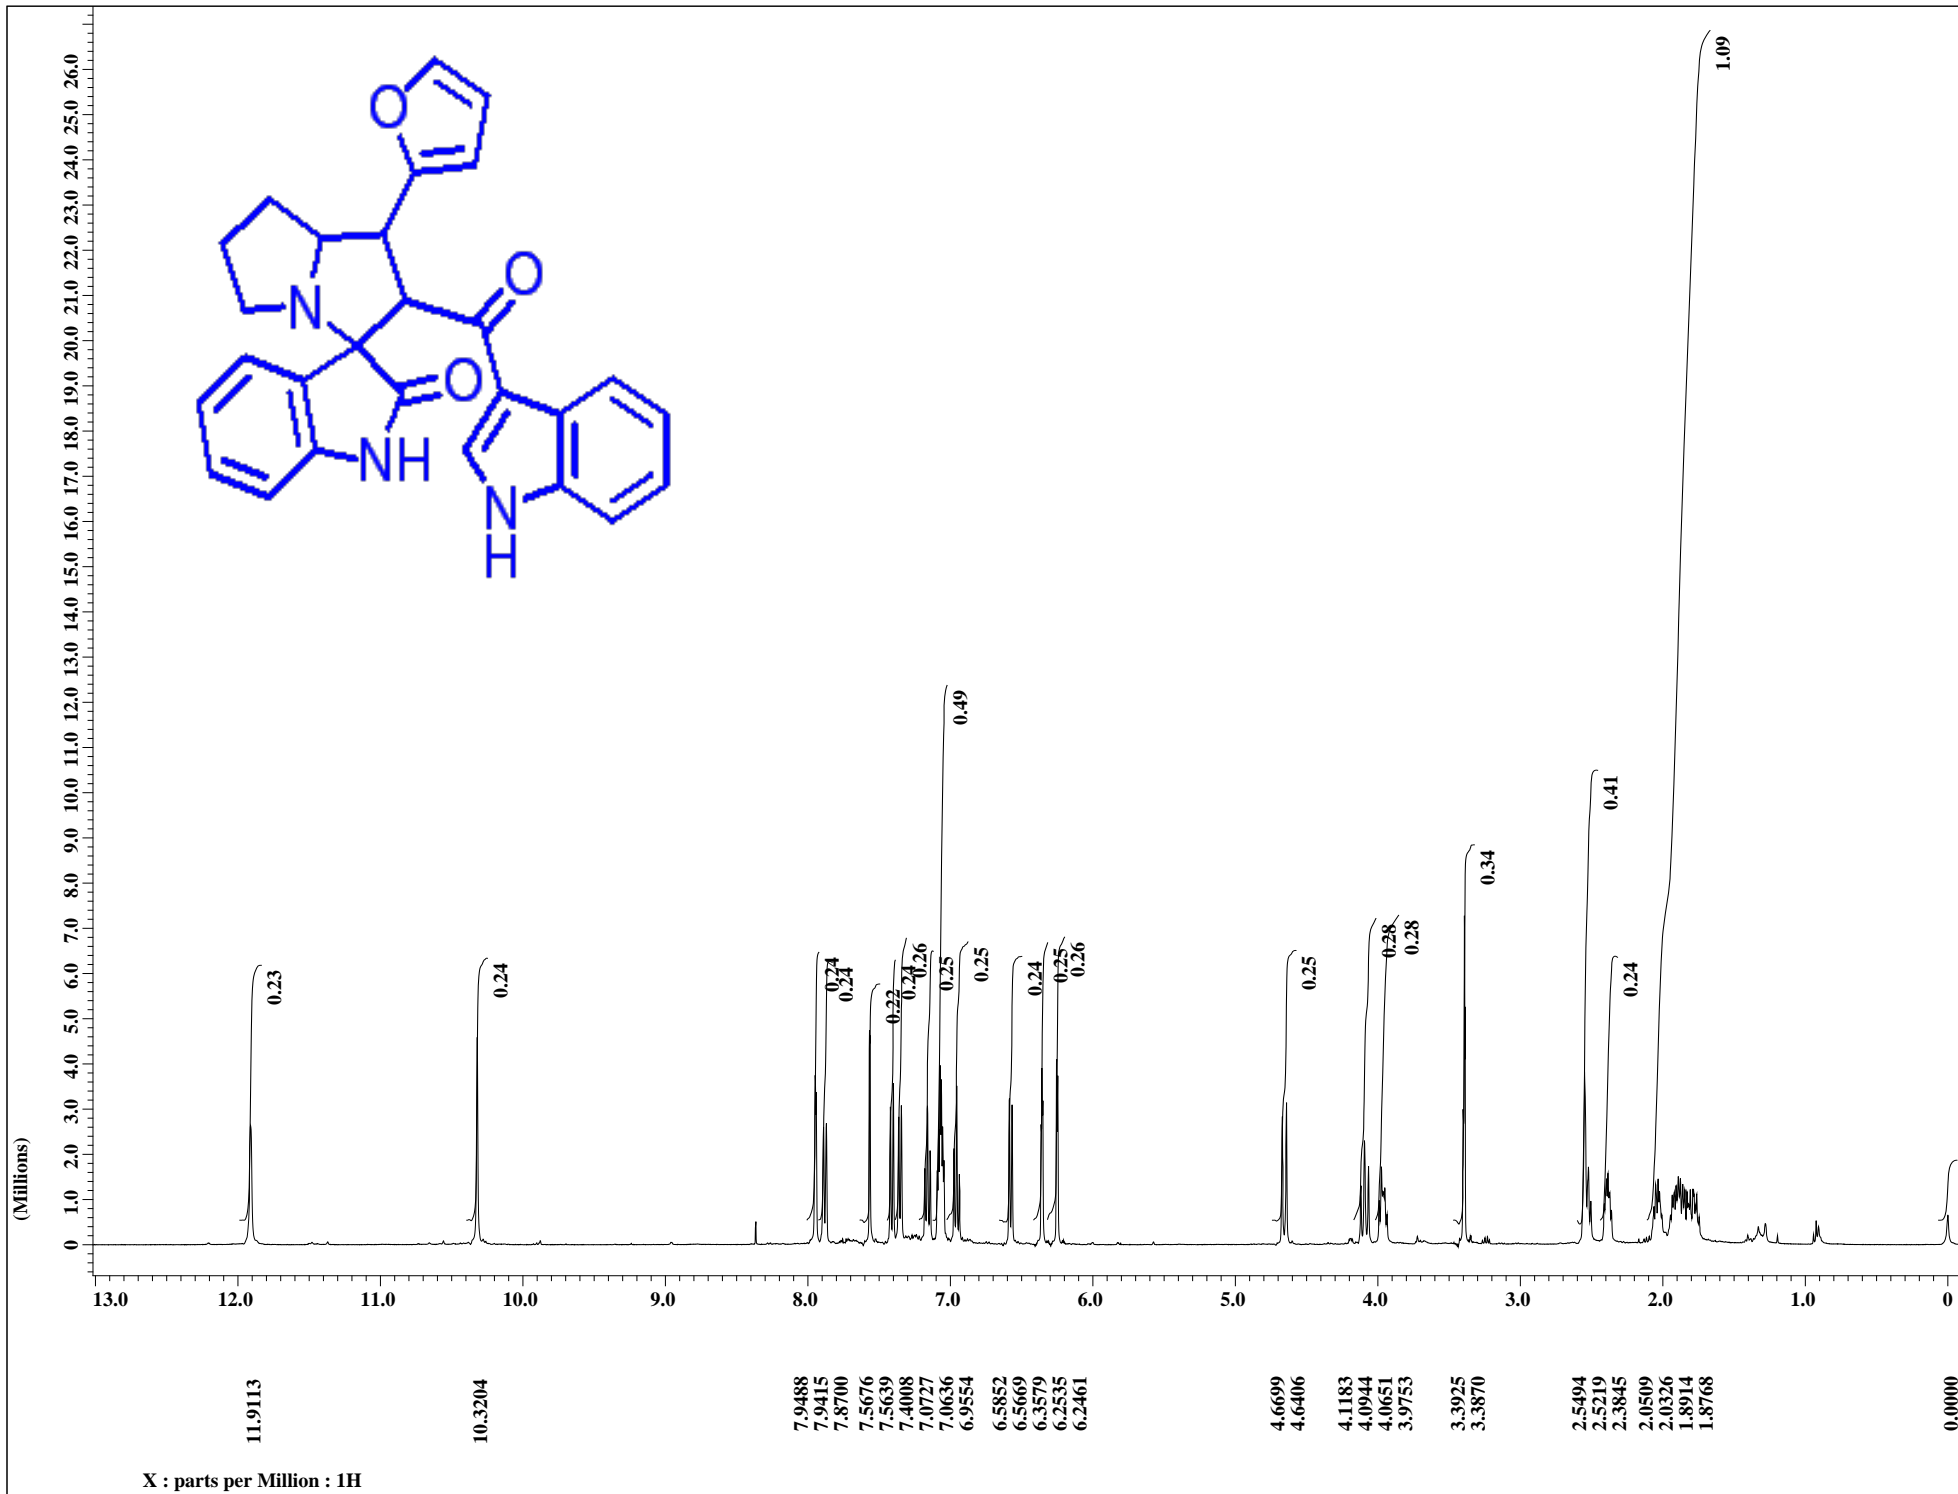

X : parts per Million : 1H

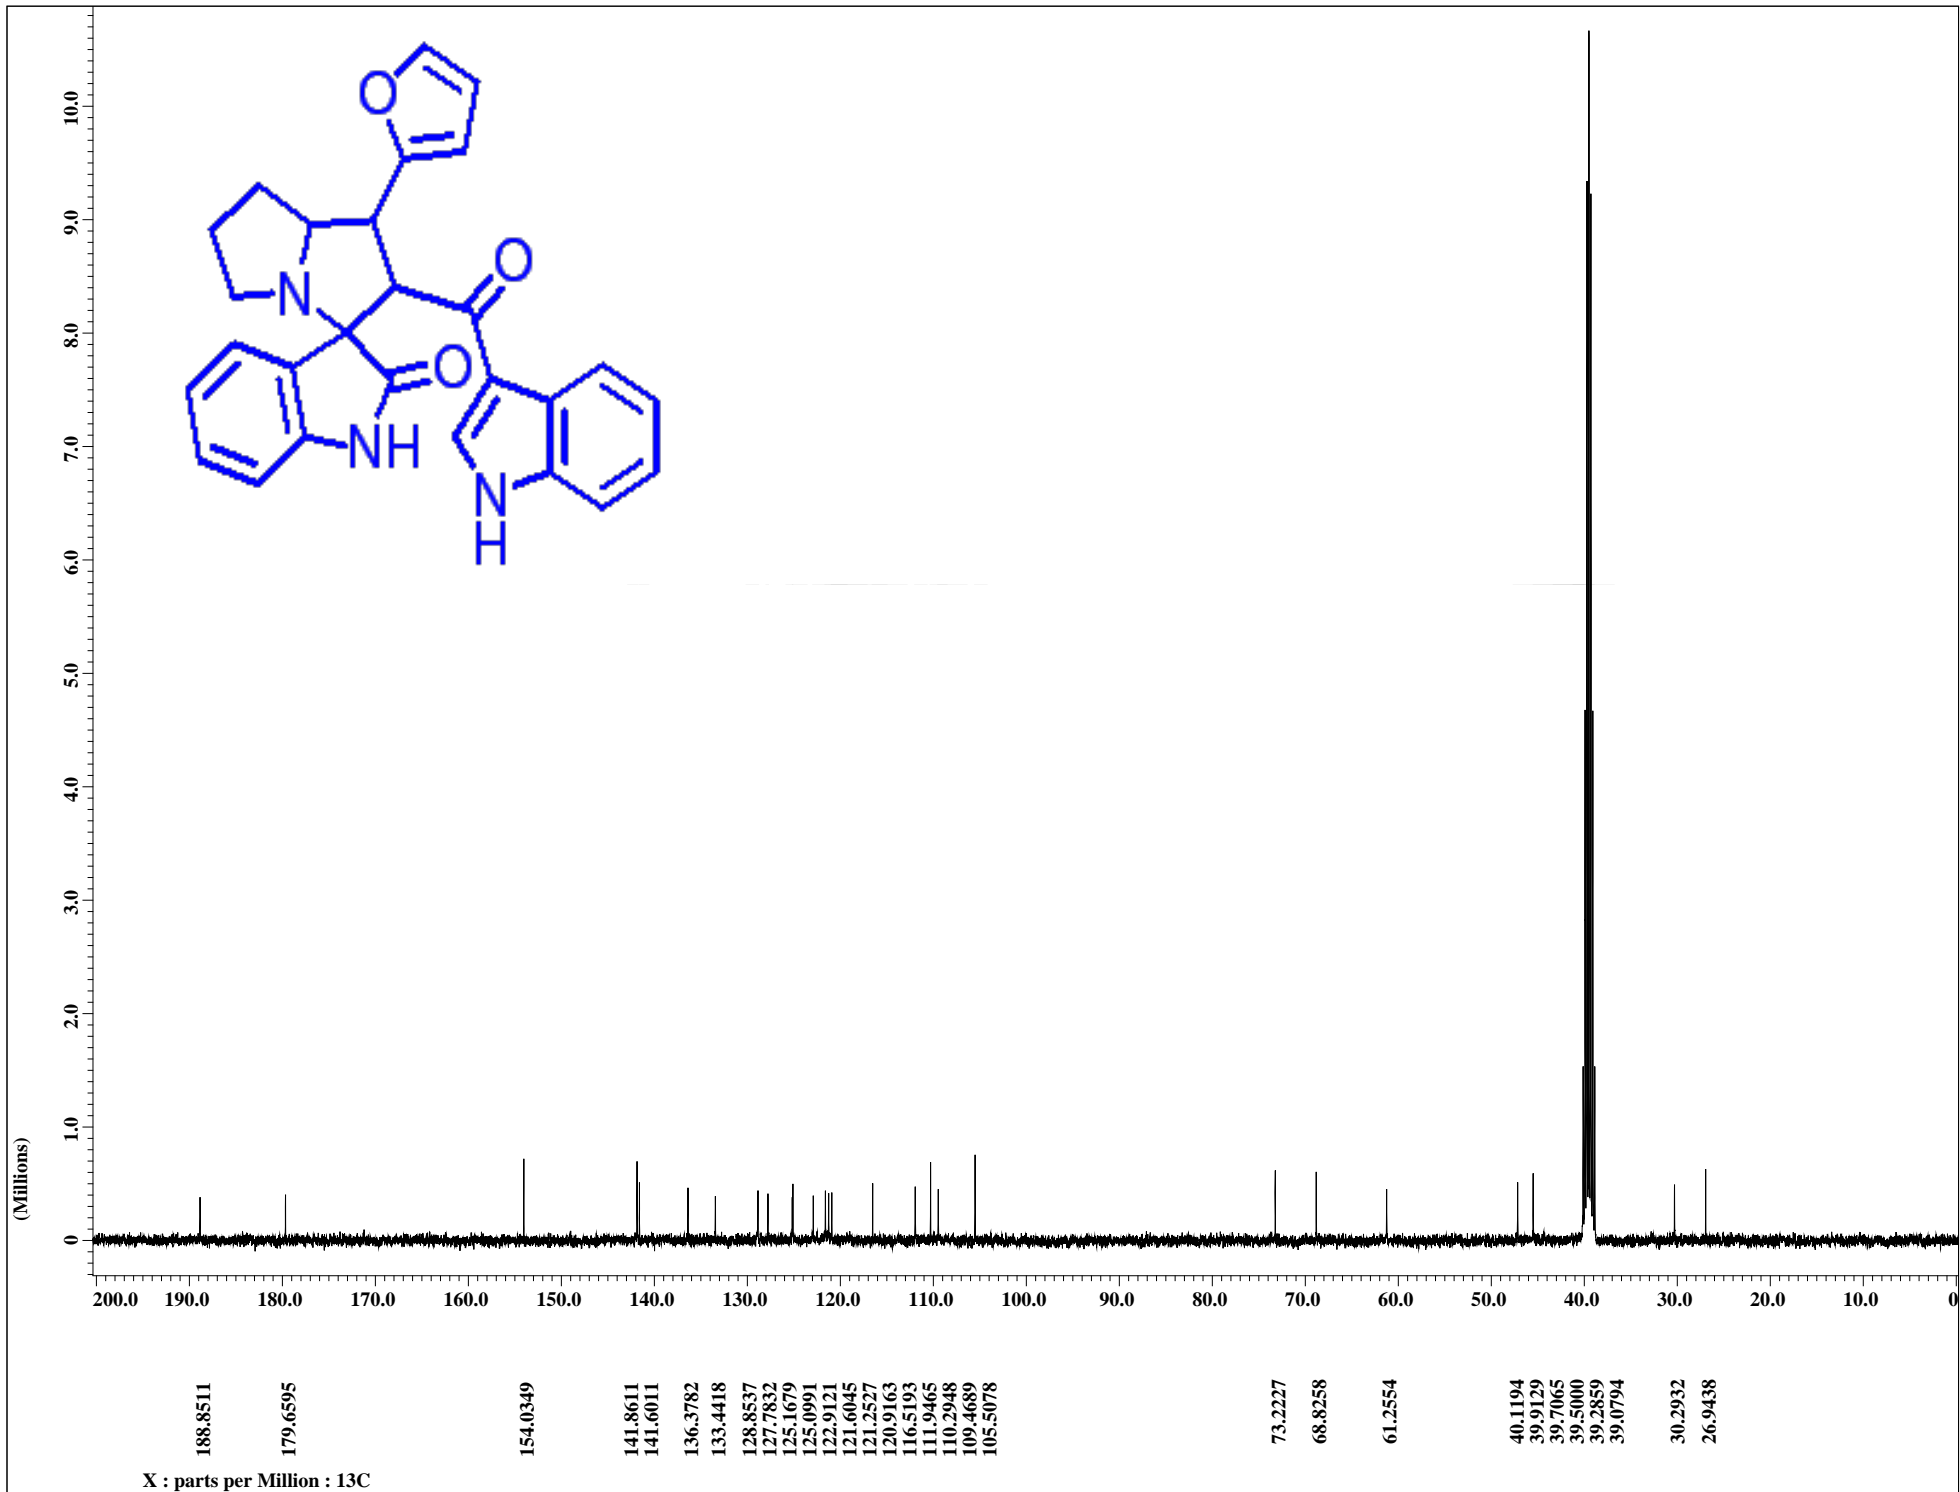



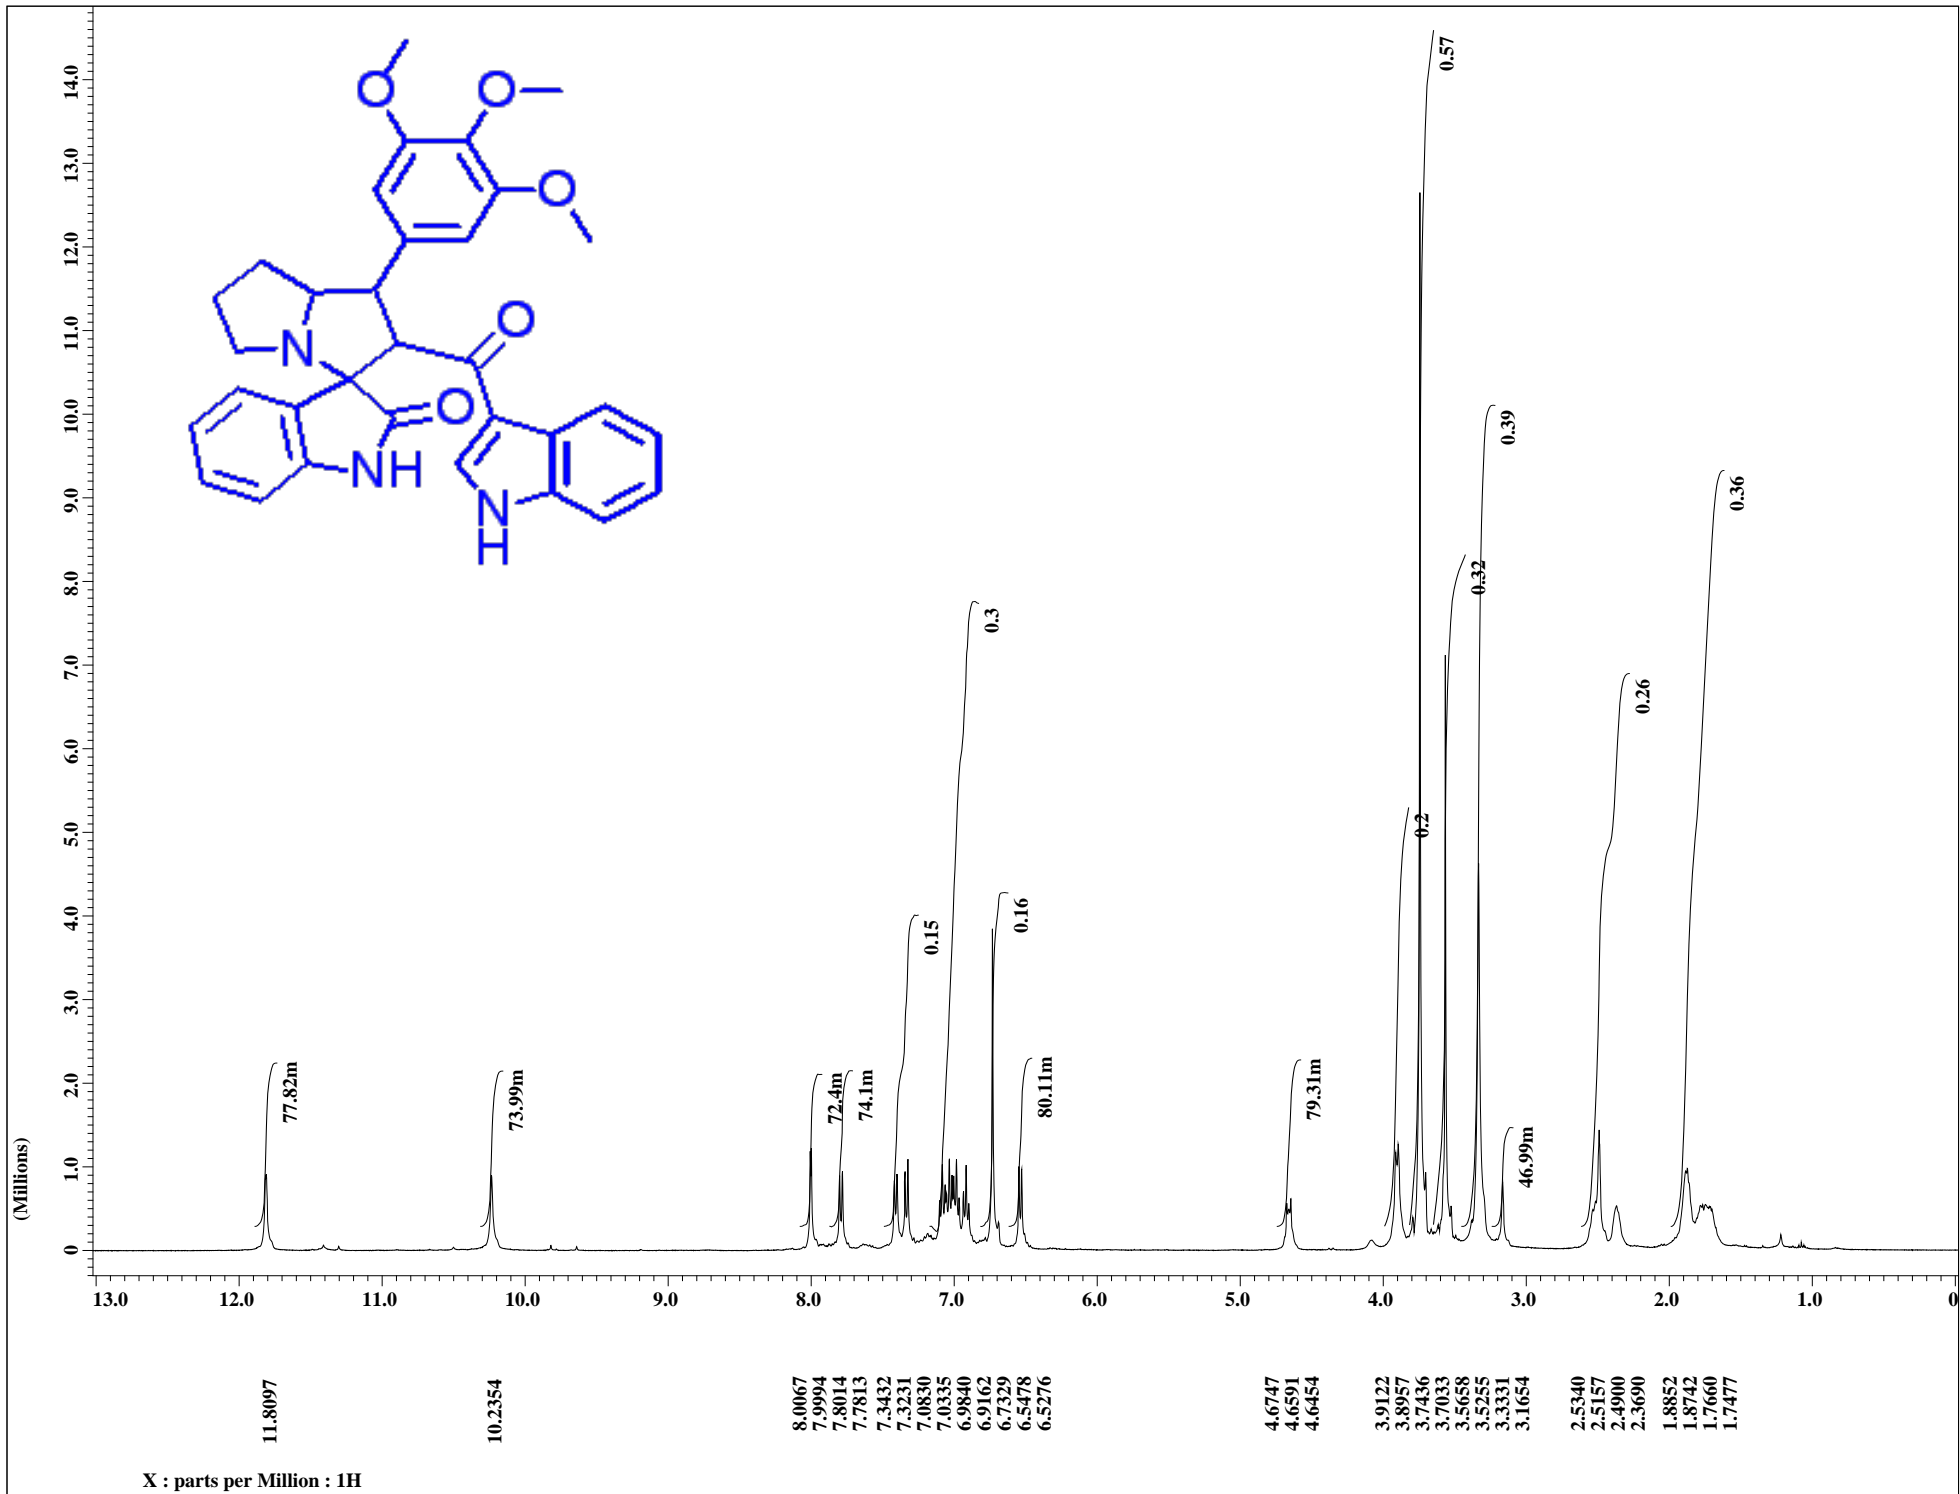

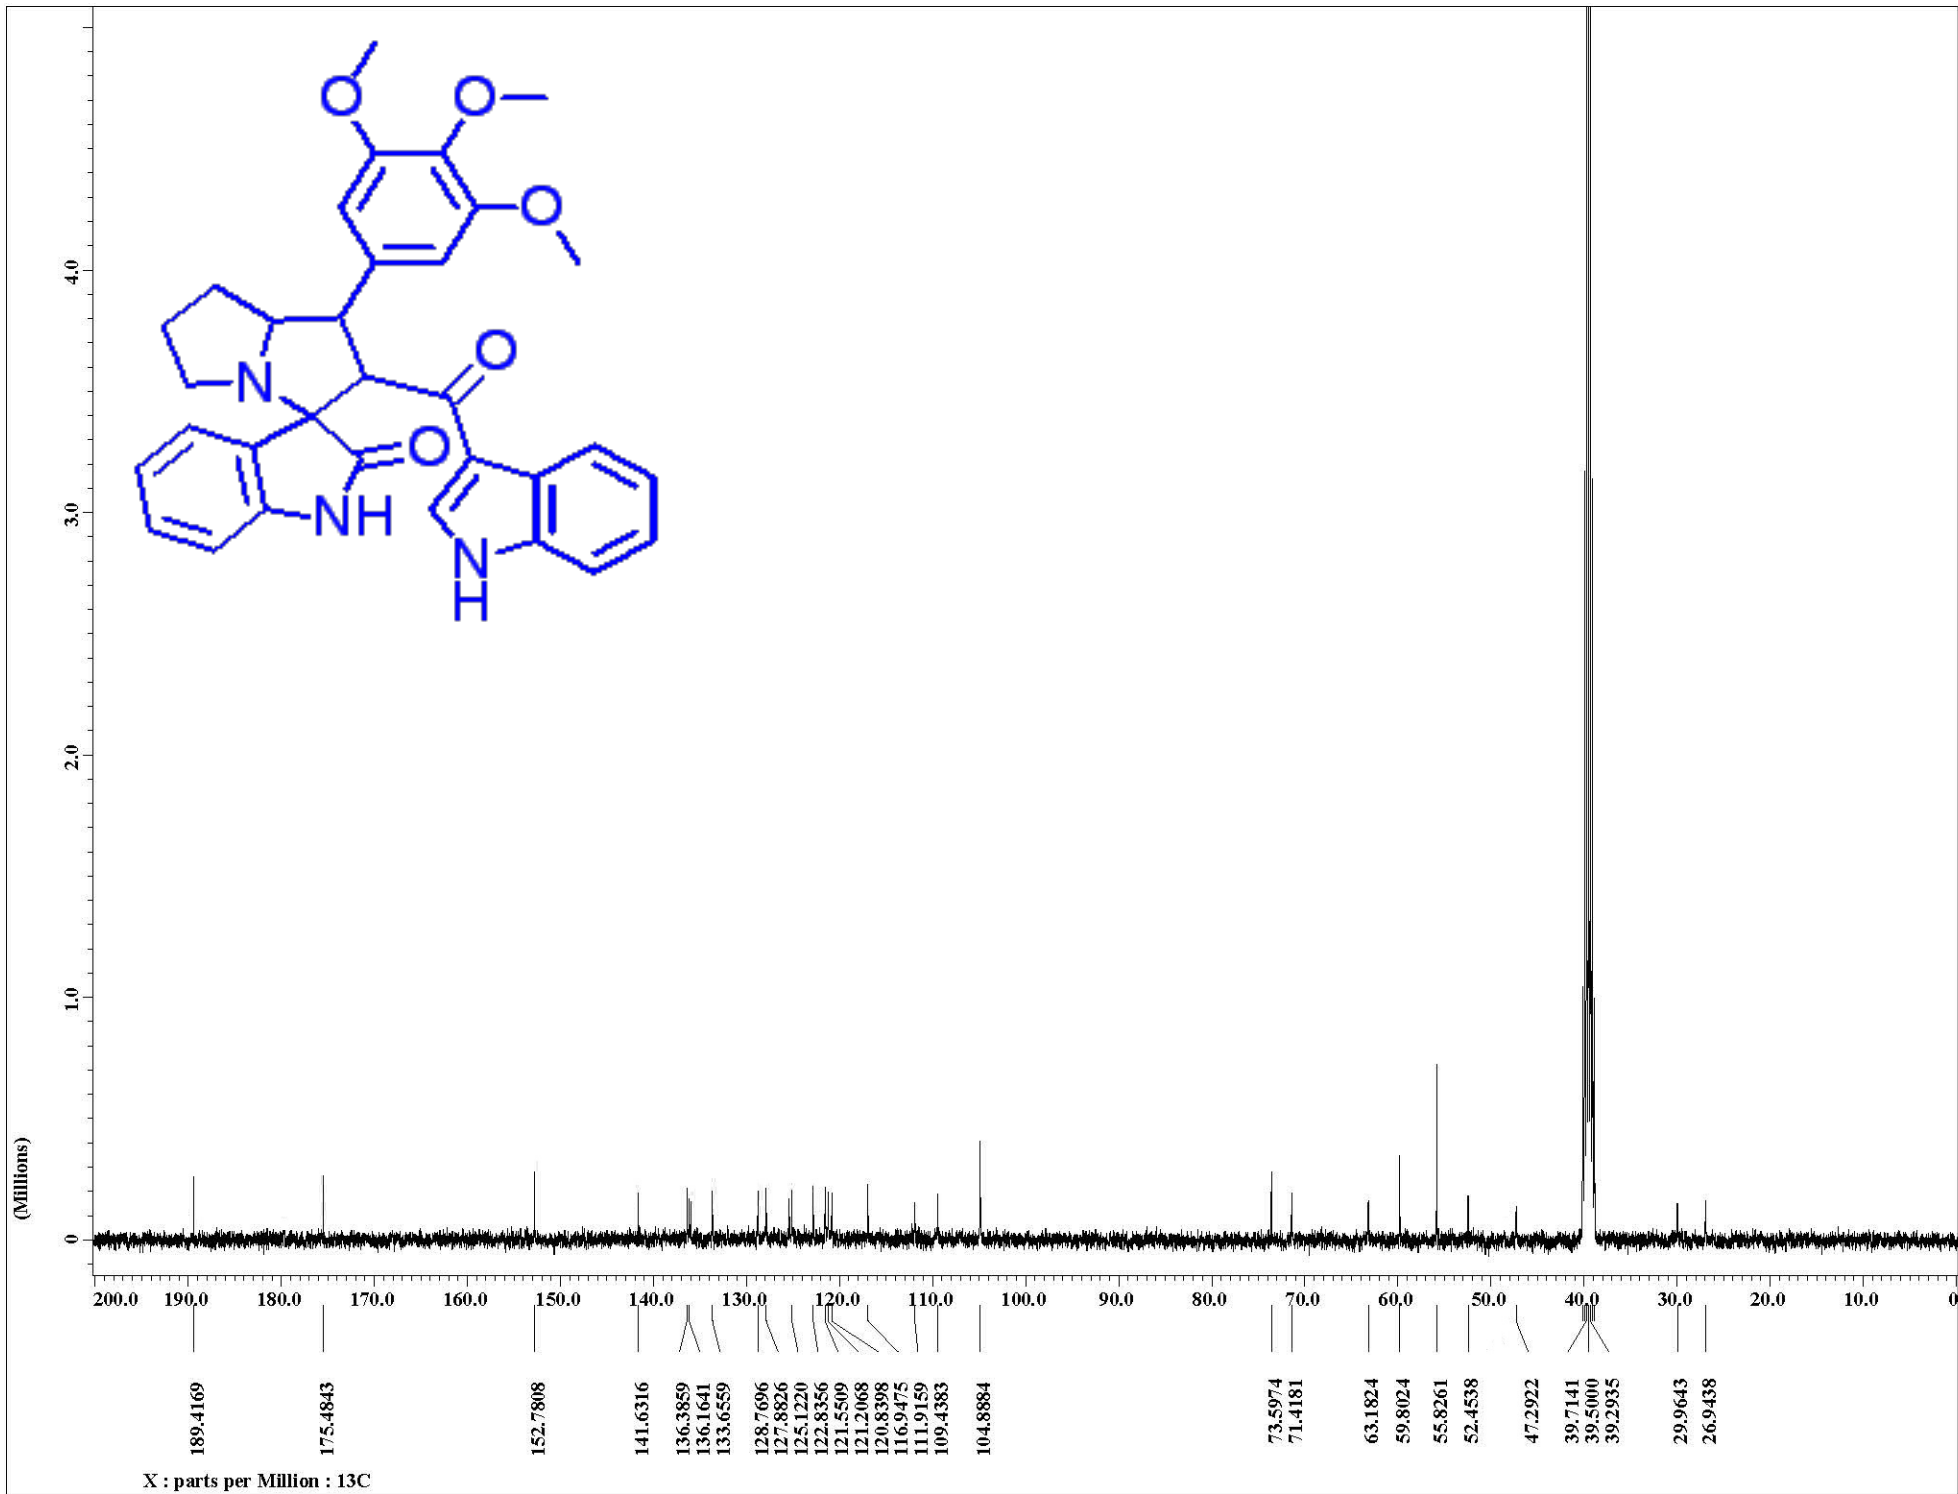

|   | Molecule                                                                                    |   |  |  | VIDA ID | PLP      | Chemgauss3 | OEChemscore | Screenscore | Consensus Score |
|---|---------------------------------------------------------------------------------------------|-----------------------------------------------------------------------------------|----------------------------------------------------------------------------------|----------------------------------------------------------------------------------|---------|----------|------------|-------------|-------------|-----------------|
| 1 | 4d_14<br>  |  | .                                                                                | .                                                                                | 2       | -43.8969 | -47.0635   | -37.5086    | -111.8020   | 19.0000         |
| 2 | 4m_31<br> | .                                                                                 | .                                                                                | .                                                                                | 3       | -39.6301 | -48.1326   | -36.6915    | -116.3491   | 25.0000         |

|   | Molecule                                                                                   |  |  |  | VIDA ID | PLP      | Chemgauss3 | OEChemscore | Screenscore | Consensus Score |
|---|--------------------------------------------------------------------------------------------|----------------------------------------------------------------------------------|----------------------------------------------------------------------------------|----------------------------------------------------------------------------------|---------|----------|------------|-------------|-------------|-----------------|
| 3 | 4l_18<br> | .                                                                                | .                                                                                | .                                                                                | 4       | -43.2531 | -46.2579   | -35.8414    | -108.6577   | 28.0000         |
| 4 | 4j_6<br> | .                                                                                | .                                                                                | .                                                                                | 5       | -49.8619 | -40.1485   | -35.7006    | -118.3784   | 36.0000         |

|   | Molecule                                                                                   |  |  |  | VIDA ID | PLP      | Chemgauss3 | OEChemscore | Screenscore | Consensus Score |
|---|--------------------------------------------------------------------------------------------|----------------------------------------------------------------------------------|----------------------------------------------------------------------------------|----------------------------------------------------------------------------------|---------|----------|------------|-------------|-------------|-----------------|
| 5 | 5l_32<br> | .                                                                                | .                                                                                | .                                                                                | 6       | -40.9698 | -51.1818   | -34.2032    | -98.4348    | 38.0000         |
| 6 | 4b_3<br> | .                                                                                | .                                                                                | .                                                                                | 7       | -42.8749 | -43.2095   | -36.8631    | -106.8663   | 39.0000         |

|   | Molecule                                                                                    |  |  |  | VIDA ID | PLP      | Chemgauss3 | OEChemscore | Screenscore | Consensus Score |
|---|---------------------------------------------------------------------------------------------|----------------------------------------------------------------------------------|----------------------------------------------------------------------------------|----------------------------------------------------------------------------------|---------|----------|------------|-------------|-------------|-----------------|
| 7 | 5m_51<br>  | .                                                                                | .                                                                                | .                                                                                | 8       | -38.9010 | -47.8791   | -33.5604    | -112.7466   | 39.0000         |
| 8 | 4e_11<br> | .                                                                                | .                                                                                | .                                                                                | 9       | -46.8264 | -42.1867   | -36.7480    | -107.3709   | 40.0000         |

|    | Molecule |                                                                                    |   | VIDA ID | PLP | Chemgauss3 | OEChemscore | Screenscore | Consensus Score |           |         |
|----|----------|------------------------------------------------------------------------------------|---|---------|-----|------------|-------------|-------------|-----------------|-----------|---------|
| 9  | 4n_6     | 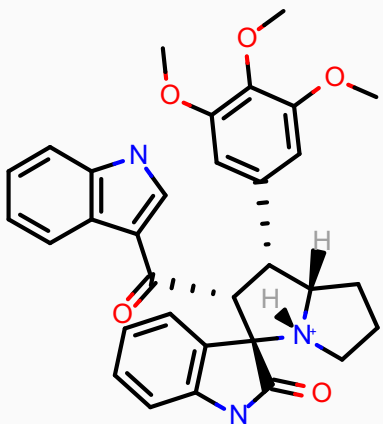  | . | .       | .   | 10         | -49.8126    | -36.6365    | -35.8107        | -124.9373 | 41.0000 |
| 10 | 4k_3     |  | . | .       | .   | 11         | -44.0345    | -44.3111    | -32.1663        | -112.3442 | 42.0000 |

|    | Molecule                                                                                    |  |  |  | VIDA ID | PLP      | Chemgauss3 | OEChemscore | Screenscore | Consensus Score |
|----|---------------------------------------------------------------------------------------------|----------------------------------------------------------------------------------|----------------------------------------------------------------------------------|----------------------------------------------------------------------------------|---------|----------|------------|-------------|-------------|-----------------|
| 11 | 4h_17<br>  | .                                                                                | .                                                                                | .                                                                                | 12      | -47.2948 | -39.5843   | -33.4473    | -115.7956   | 50.0000         |
| 12 | 5d_12<br> | .                                                                                | .                                                                                | .                                                                                | 13      | -32.2426 | -51.3031   | -36.9214    | -93.1185    | 50.0000         |



|    | Molecule                                                                                   |  |  |  | VIDA ID | PLP      | Chemgauss3 | OEChemscore | Screenscore | Consensus Score |
|----|--------------------------------------------------------------------------------------------|----------------------------------------------------------------------------------|----------------------------------------------------------------------------------|----------------------------------------------------------------------------------|---------|----------|------------|-------------|-------------|-----------------|
| 13 | 5n_3<br>  | *                                                                                | *                                                                                | *                                                                                | 14      | -36.5671 | -44.1508   | -35.2216    | -93.2587    | 59.0000         |
| 14 | 4f_1<br> | *                                                                                | *                                                                                | *                                                                                | 15      | -39.4647 | -39.8280   | -33.1119    | -107.6050   | 71.0000         |

|    | Molecule                                                                                        |  |  |  | VIDA ID | PLP      | Chemgauss3 | OEChemscore | Screenscore | Consensus Score |
|----|-------------------------------------------------------------------------------------------------|----------------------------------------------------------------------------------|----------------------------------------------------------------------------------|----------------------------------------------------------------------------------|---------|----------|------------|-------------|-------------|-----------------|
| 15 | 5LAW-Lig_7<br> | .                                                                                | .                                                                                | .                                                                                | 16      | -37.2815 | -50.3208   | -31.8426    | -84.3965    | 73.0000         |
| 16 | 5a_6<br>      | .                                                                                | .                                                                                | .                                                                                | 17      | -33.1745 | -43.8700   | -32.7218    | -95.3957    | 74.0000         |

|    | Molecule                                                                                    |  |  |  | VIDA ID | PLP      | Chemgauss3 | OEChemscore | Screenscore | Consensus Score |
|----|---------------------------------------------------------------------------------------------|----------------------------------------------------------------------------------|----------------------------------------------------------------------------------|----------------------------------------------------------------------------------|---------|----------|------------|-------------|-------------|-----------------|
| 17 | st1_66<br> | .                                                                                | .                                                                                | .                                                                                | 18      | -36.7414 | -44.1902   | -31.4586    | -94.0793    | 74.0000         |
| 18 | 5h_9<br>  | .                                                                                | .                                                                                | .                                                                                | 19      | -41.0206 | -35.6290   | -35.9141    | -84.9015    | 76.0000         |

|    | Molecule                                                                                   |   |   | VIDA ID | PLP | Chemgauss3 | OEChemscore | Screenscore | Consensus Score |         |
|----|--------------------------------------------------------------------------------------------|---|---|---------|-----|------------|-------------|-------------|-----------------|---------|
| 19 | st7_3<br>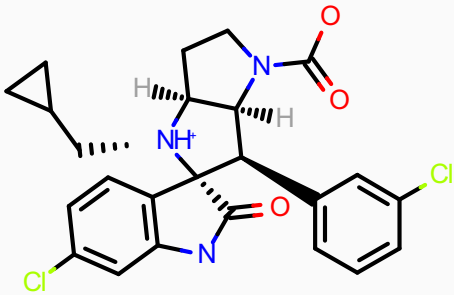 | . | . | .       | 20  | -33.3921   | -51.2094    | -27.8704    | -94.1628        | 77.0000 |
| 20 | 4a_6<br> | . | . | .       | 21  | -34.3374   | -43.0117    | -33.9697    | -85.6030        | 78.0000 |

|    | Molecule                                                                                    |  |  |  | VIDA ID | PLP      | Chemgauss3 | OEChemscore | Screenscore | Consensus Score |
|----|---------------------------------------------------------------------------------------------|----------------------------------------------------------------------------------|----------------------------------------------------------------------------------|----------------------------------------------------------------------------------|---------|----------|------------|-------------|-------------|-----------------|
| 21 | st4_44<br> | .                                                                                | .                                                                                | .                                                                                | 22      | -42.7818 | -39.8367   | -30.2014    | -104.7276   | 78.0000         |
| 22 | 5f_1<br>  | .                                                                                | .                                                                                | .                                                                                | 23      | -33.1035 | -43.3786   | -33.4818    | -86.6951    | 80.0000         |

|    | Molecule                                                                                    |  |  |  | VIDA ID | PLP      | Chemgauss3 | OEChemscore | Screenscore | Consensus Score |
|----|---------------------------------------------------------------------------------------------|----------------------------------------------------------------------------------|----------------------------------------------------------------------------------|----------------------------------------------------------------------------------|---------|----------|------------|-------------|-------------|-----------------|
| 23 | st5_23<br> | .                                                                                | .                                                                                | .                                                                                | 24      | -42.2645 | -38.7011   | -29.3169    | -108.2522   | 81.0000         |
| 24 | 5j_2<br>  | .                                                                                | .                                                                                | .                                                                                | 25      | -34.2389 | -43.5267   | -33.6259    | -81.3622    | 82.0000         |

|    | Molecule                                                                                   |  |  |  | VIDA ID | PLP      | Chemgauss3 | OEChemscore | Screenscore | Consensus Score |
|----|--------------------------------------------------------------------------------------------|----------------------------------------------------------------------------------|----------------------------------------------------------------------------------|----------------------------------------------------------------------------------|---------|----------|------------|-------------|-------------|-----------------|
| 25 | 4i_12<br> | .                                                                                | .                                                                                | .                                                                                | 26      | -35.0521 | -43.6876   | -31.8044    | -90.2029    | 82.0000         |
| 26 | 5b_6<br> | .                                                                                | .                                                                                | .                                                                                | 27      | -31.1570 | -43.8512   | -33.1818    | -85.8385    | 84.0000         |

|    | Molecule                                                                                   |  |  |  | VIDA ID | PLP      | Chemgauss3 | OEChemscore | Screenscore | Consensus Score |
|----|--------------------------------------------------------------------------------------------|----------------------------------------------------------------------------------|----------------------------------------------------------------------------------|----------------------------------------------------------------------------------|---------|----------|------------|-------------|-------------|-----------------|
| 27 | 4g_6<br>  | *                                                                                | *                                                                                | *                                                                                | 28      | -42.5365 | -36.5579   | -30.6523    | -97.2936    | 86.0000         |
| 28 | 4c_3<br> | *                                                                                | *                                                                                | *                                                                                | 29      | -33.7504 | -43.4569   | -30.7180    | -85.7023    | 92.0000         |



|    | Molecule                                                                                    |  |  |  | VIDA ID | PLP      | Chemgauss3 | OEChemscore | Screenscore | Consensus Score |
|----|---------------------------------------------------------------------------------------------|----------------------------------------------------------------------------------|----------------------------------------------------------------------------------|----------------------------------------------------------------------------------|---------|----------|------------|-------------|-------------|-----------------|
| 29 | st2_73<br> | *                                                                                | *                                                                                | *                                                                                | 30      | -38.8238 | -43.0550   | -32.0881    | -69.8469    | 96.0000         |
| 30 | 5i_1<br>  | *                                                                                | *                                                                                | *                                                                                | 31      | -32.6082 | -42.3921   | -33.2965    | -82.0229    | 97.0000         |

|    | Molecule                                                                                      |  |  |  | VIDA ID | PLP      | Chemgauss3 | OEChemscore | Screenscore | Consensus Score |
|----|-----------------------------------------------------------------------------------------------|----------------------------------------------------------------------------------|----------------------------------------------------------------------------------|----------------------------------------------------------------------------------|---------|----------|------------|-------------|-------------|-----------------|
| 31 | 5k_1<br>     | .                                                                                | .                                                                                | .                                                                                | 32      | -24.8977 | -51.7531   | -27.6202    | -83.3487    | 98.0000         |
| 32 | st3_176<br> | .                                                                                | .                                                                                | .                                                                                | 33      | -37.1112 | -30.5460   | -33.1862    | -82.3946    | 100.0000        |

|    | Molecule                                                                                    |  |  |  | VIDA ID | PLP      | Chemgauss3 | OEChemscore | Screenscore | Consensus Score |
|----|---------------------------------------------------------------------------------------------|----------------------------------------------------------------------------------|----------------------------------------------------------------------------------|----------------------------------------------------------------------------------|---------|----------|------------|-------------|-------------|-----------------|
| 33 | 5g_6<br>   | .                                                                                | .                                                                                | .                                                                                | 34      | -28.9542 | -42.4108   | -32.2288    | -83.4253    | 101.0000        |
| 34 | 5e_10<br> | .                                                                                | .                                                                                | .                                                                                | 35      | -22.5473 | -50.6644   | -28.1813    | -73.9543    | 107.0000        |

|    | Molecule |                                                                                     |   | VIDA ID | PLP | Chemgauss3 | OEChemscore | Screenscore | Consensus Score |          |          |
|----|----------|-------------------------------------------------------------------------------------|---|---------|-----|------------|-------------|-------------|-----------------|----------|----------|
| 35 | 5c_1     | 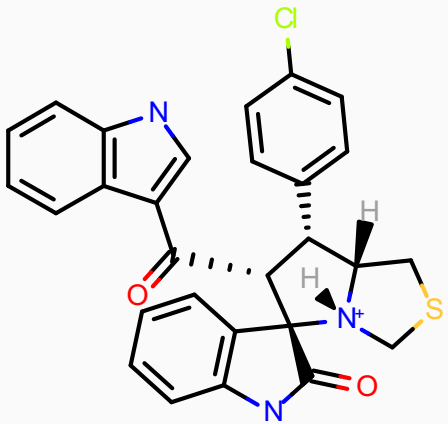   | . | .       | .   | 36         | -28.2499    | -41.9340    | -32.1666        | -80.8915 | 111.0000 |
| 36 | st6_64   |   | . | .       | .   | 37         | -28.0238    | -41.4120    | -28.8875        | -75.0506 | 124.0000 |
| 37 | st8_15   |  | . | .       | .   | 38         | -27.9871    | -38.7313    | -27.3032        | -70.0984 | 136.0000 |
